# Supplementary material for: Direct access to 2-(hetero)arylated pyridines from 6-substituted 2-bromopyridines via phosphine-free palladium-catalyzed C–H bond arylations: the importance of the C6 substituent
Source: Royal Society of Chemistry journal article supplement (doi:10.1039/c6ra01861k), 2016-01-01

Supporting Information for:

## Direct Access to 2-(Hetero)arylated Pyridines from 6-Substituted 2-Bromopyridines *via* Phosphine-Free Palladium-Catalyzed C–H Bond Arylations: The Importance of the C6 Substituent

Wided Hagui,<sup>a,b,c</sup> Néji Besbes,<sup>c</sup> Ezzeddine Srasra,<sup>c</sup> Jean-François Soulé\*<sup>a</sup> and Henri Doucet\*<sup>a</sup>

<sup>a</sup> Institut des Sciences Chimiques de Rennes, UMR 6226 CNRS-Université de Rennes 1 " Organométalliques, Matériaux et Catalyse", Campus de Beaulieu, 35042 Rennes, France.

<sup>b</sup> Université de Tunis El Manar, Faculté des Sciences de Tunis, Campus Universitaire El-Manar, 2092 El Manar Tunis, Tunisia.

<sup>c</sup> Laboratoire Physicochimie des Matériaux Minéraux et leurs Applications, Centre National des Recherches en Sciences des Matériaux, Technopole de Bordj Cedria, Soliman, 8027, Tunisia

**General information:** All reactions were carried out under argon atmosphere with standard Schlenk techniques. DMA was purchased from Acros Organics and was not purified before use. <sup>1</sup>H NMR spectra were recorded on Bruker GPX (400 MHz) spectrometer. Chemical shifts (δ) were reported in parts per million relative to residual chloroform (7.26 ppm for <sup>1</sup>H; 77.0 ppm for <sup>13</sup>C), constants were reported in Hertz. <sup>1</sup>H NMR assignment abbreviations were the following: singlet (s), doublet (d), triplet (t), quartet (q), doublet of doublets (dd), doublet of triplets (dt), and multiplet (m). <sup>13</sup>C NMR spectra were recorded at 100 MHz on the same spectrometer and reported in ppm. All reagents were weighed and handled in air.

**General Procedure A:** As a typical experiment, the reaction of 2,6-dibromopyridine (355 mg, 1.5 mmol), (hetero)arene derivative (1 mmol), CF<sub>3</sub>CO<sub>2</sub>K (2 equiv. 304 mg) at 150 °C during 5 h in DMA (4 mL) in the presence of Pd(OAc)<sub>2</sub> (1 mol%) (see tables or schemes) under argon affords the desired product after evaporation of the solvent and purification by silica column chromatography.

**General Procedure B:** As a typical experiment, the reaction of 2,5-dibromopyridine (237 mg, 1 mmol), (hetero)arene derivative (2.5 mmol), KOAc (2 equiv., 196 mg) at 150 °C during 16 h in DMA (4 mL) in the presence of Pd(OAc)<sub>2</sub> (1 mol%) (see tables or schemes) under argon affords the desired product after evaporation of the solvent and purification by silica column chromatography.

**General Procedure C:** As a typical experiment, the reaction of the 6-substituted 2-bromopyridine (1 mmol), (hetero)arene derivative (1.5 mmol), KOAc (2 equiv., 196 mg) at 150 °C during 16 h in DMA (4 mL) in the

presence of Pd(OAc)<sub>2</sub> (1 mol%) (see tables or schemes) under argon affords the desired product after evaporation of the solvent and purification by silica column chromatography.

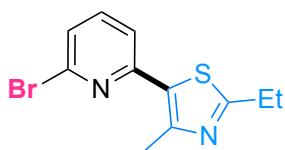

**5-(6-Bromopyridin-2-yl)-2-ethyl-4-methylthiazole (2):** Following the general procedure **A** using 2,6-dibromopyridine (355 mg, 1.5 mmol) and 2-ethyl-4-methylthiazole (127 mg, 1 mmol), the residue was purified by flash chromatography on silica gel to afford the desired compound **2** (249 mg, 88%).

<sup>1</sup>H NMR (400 MHz, CDCl<sub>3</sub>) δ (ppm) 7.51 (t, *J* = 7.8 Hz, 1H), 7.42 (dd, *J* = 1.0 and 7.8 Hz, 1H), 7.29 (dd, *J* = 1.0 and 7.8 Hz, 1H), 2.96 (q, *J* = 7.6 Hz, 2H), 2.61 (s, 3H), 1.36 (t, *J* = 7.6 Hz, 3H).

<sup>13</sup>C NMR (100 MHz, CDCl<sub>3</sub>) δ (ppm) 172.6, 152.8, 150.2, 141.5, 138.7, 130.1, 125.6, 120.2, 27.0, 17.5, 14.1.

Elemental analysis: calcd (%) C<sub>11</sub>H<sub>11</sub>BrN<sub>2</sub>S for (283.18): C 46.66, H 3.92; found: C 46.97, H 3.51.

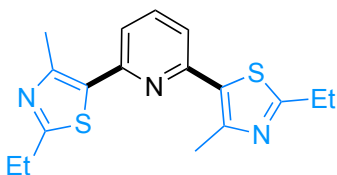

**2,6-Bis(2-ethyl-4-methylthiazol-5-yl)pyridine (3):** Following the general procedure **B** using 2,6-dibromopyridine (237 mg, 1 mmol) and 2-ethyl-4-methylthiazole (318 mg, 2.5 mmol), the residue was purified by flash chromatography on silica gel to afford the desired compound **3** (300 mg, 91%).

91%).

<sup>1</sup>H NMR (300 MHz, CDCl<sub>3</sub>) δ (ppm) 7.54 (t, *J* = 7.7 Hz, 1H), 7.43 (d, *J* = 7.7 Hz, 1H), 7.33 (d, *J* = 7.7 Hz, 1H), 2.98 (q, *J* = 7.6 Hz, 4H), 2.30 (s, 6H), 1.38 (t, *J* = 7.6 Hz, 6H).

<sup>13</sup>C NMR (75 MHz, CDCl<sub>3</sub>) δ (ppm) 172.4, 150.8, 141.5, 138.7, 125.6, 120.2, 26.9, 15.8, 14.1

Elemental analysis: calcd (%) C<sub>17</sub>H<sub>19</sub>N<sub>3</sub>S<sub>2</sub> for (329.48): C 61.97, H 5.81; found: C 62.08, H 5.46.

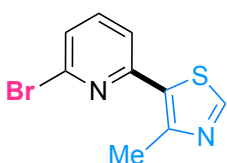

**5-(6-Bromopyridin-2-yl)-4-methylthiazole (4):** Following the general procedure **A** using 2,6-dibromopyridine (355 mg, 1.5 mmol) and 4-methylthiazole (99 mg, 1 mmol), the residue was purified by flash chromatography on silica gel to afford the desired compound **4** (117 mg, 46%).

<sup>1</sup>H NMR (400 MHz, CDCl<sub>3</sub>) δ (ppm) 8.72 (s, 1H), 7.58 (t, *J* = 7.8 Hz, 1H), 7.49 (d, *J* = 7.6 Hz, 1H), 7.37 (d, *J* = 7.7 Hz, 1H), 2.72 (s, 3H).

<sup>13</sup>C NMR (100 MHz, CDCl<sub>3</sub>) δ (ppm) 152.5, 151.4, 141.7, 138.9, 131.3, 126.2, 120.6, 17.6.

Elemental analysis: calcd (%) C<sub>9</sub>H<sub>7</sub>BrN<sub>2</sub>S for (255.13): C 42.37, H 2.77; found: C 42.54, H 3.09.

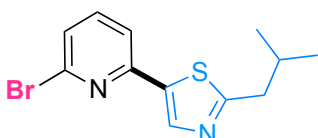

**5-(6-Bromopyridin-2-yl)-2-isobutylthiazole (5):** Following the general procedure **A** using 2,6-dibromopyridine (355 mg, 1.5 mmol) and 2-isobutylthiazole (141 mg, 1 mmol), the residue was purified by flash

chromatography on silica gel to afford the desired compound **5** (232 mg, 78%).

<sup>1</sup>H NMR (400 MHz, CDCl<sub>3</sub>) δ (ppm) 8.11 (s, 1H), 7.55-7.72 (m, 2H), 7.34 (dd, *J* = 3.1 and 5.5 Hz, 1H), 2.89 (d, *J* = 7.2 Hz, 2H), 2.15-2.11 (m, 1H), 1.01 (d, *J* = 6.6 Hz, 6H).

<sup>13</sup>C NMR (100 MHz, CDCl<sub>3</sub>) δ (ppm) 173.0, 151.8, 141.9, 140.3, 138.9, 137.6, 126.4, 118.2, 42.7, 29.9, 22.3.

Elemental analysis: calcd (%) C<sub>12</sub>H<sub>13</sub>BrN<sub>2</sub>S for (297.21): C 48.49, H 4.41; found: C 48.62, H 4.76.

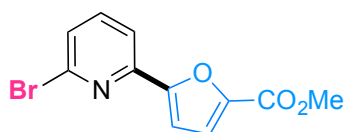

**Methyl 5-(6-bromopyridin-2-yl)furan-2-carboxylate (6):** Following the general procedure **A** using 2,6-dibromopyridine (355 mg, 1.5 mmol) and methyl furan-2-carboxylate (126 mg, 1 mmol), the residue was purified by flash chromatography on silica gel to afford the desired compound **6** (169 mg, 60%).

<sup>1</sup>H NMR (400 MHz, CDCl<sub>3</sub>) δ (ppm) 7.86 (d, *J* = 7.7 Hz, 1H), 7.62 (t, *J* = 7.7 Hz, 1H), 7.43 (d, *J* = 7.7 Hz, 1H), 7.29 (d, *J* = 3.6 Hz, 1H), 7.24 (d, *J* = 3.6 Hz, 1H), 3.94 (s, 3H).

<sup>13</sup>C NMR (100 MHz, CDCl<sub>3</sub>) δ (ppm) 154.2, 150.5, 144.3, 140.1, 137.4, 134.3, 122.8, 115.1, 113.4, 106.6, 47.3.

Elemental analysis: calcd (%) C<sub>11</sub>H<sub>8</sub>BrNO<sub>3</sub> for (282.09): C 46.84, H 2.86; found: C 46.98, H 3.02.

**2-(Benzofuran-2-yl)-6-bromopyridine (7):** Following the general procedure **A** using 2,6-dibromopyridine (355 mg, 1.5 mmol) and benzofuran (118 mg, 1 mmol), the residue was purified by flash chromatography on silica gel to afford the desired compound **7** (233 mg, 85%).

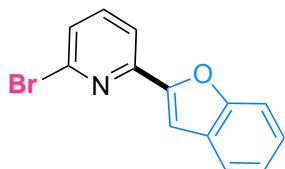

<sup>1</sup>H NMR (400 MHz, CDCl<sub>3</sub>) δ (ppm) 7.90-7.84 (m, 1H), 7.70-7.61 (m, 2H), 7.57 (d, *J* = 7.6 Hz, 1H), 7.54 (s, 1H), 7.43 (d, *J* = 7.6 Hz, 1H), 7.37 (dt, *J* = 1.0 and 7.6 Hz, 1H), 7.32-7.26 (m, 1H).

<sup>13</sup>C NMR (100 MHz, CDCl<sub>3</sub>) δ (ppm) 155.4, 153.6, 150.2, 142.2, 138.9, 128.3, 127.1, 125.6, 123.3, 121.9, 118.2, 111.5, 106.3.

Elemental analysis: calcd (%) C<sub>13</sub>H<sub>8</sub>BrNO for (274.12): C 56.96, H 2.94; found: C 57.18, H 3.06.

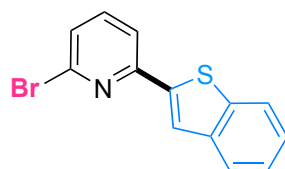

**2-(Benzo[b]thiophen-2-yl)-6-bromopyridine (8):** Following the general procedure **A** using 2,6-dibromopyridine (355 mg, 1.5 mmol) and benzo[b]thiophene (134 mg, 1 mmol), the residue was purified by flash chromatography on silica gel to afford the desired compound **8** (151 mg, 52%).

<sup>1</sup>H NMR (400 MHz, CDCl<sub>3</sub>) δ (ppm) 7.89 (s, 1H), 7.87-7.84 (m, 1H), 7.81 (dd, *J* = 3.5 and 5.6 Hz, 1H), 7.69 (d, *J* = 7.7 Hz, 1H), 7.56 (t, *J* = 7.7 Hz, 1H), 7.42-7.34 (m, 3H).

<sup>13</sup>C NMR (100 MHz, CDCl<sub>3</sub>) δ (ppm) 153.6, 142.6, 142.0, 140.8, 140.2, 138.8, 126.7, 125.4, 124.7, 124.8, 122.6, 122.5, 118.4.

Elemental analysis: calcd (%) C<sub>13</sub>H<sub>8</sub>BrNS for (290.18): C 53.81, H 2.78; found: C 54.06, H 2.56.

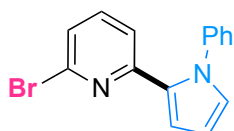

**2-Bromo-6-(1-phenylpyrrol-2-yl)pyridine (9):** Following the general procedure **A** using 2,6-dibromopyridine (355 mg, 1.5 mmol) and 1-phenylpyrrole (143 mg, 1 mmol), the residue was purified by flash chromatography on silica gel to afford the desired compound **9** (215 mg, 72%).

<sup>1</sup>H NMR (400 MHz, CDCl<sub>3</sub>) δ (ppm) 7.39-7.36 (m, 2H), 7.35 (t, *J* = 1.6 Hz, 1H), 7.28 (t, *J* = 6.7 Hz, 1H), 7.24-7.21 (m, 2H), 7.16 (d, *J* = 7.8 Hz, 1H), 6.96 (dd, *J* = 1.8 and 2.7 Hz, 1H), 6.90 (d, *J* = 7.7 Hz, 1H), 6.87 (dd, *J* = 1.8 and 3.7 Hz, 1H), 6.37 (dd, *J* = 2.8 and 3.7 Hz, 1H).

$^{13}\text{C}$  NMR (100 MHz,  $\text{CDCl}_3$ )  $\delta$  (ppm) 152.2, 141.2, 140.7, 137.9, 131.6, 129.0, 127.1, 127.0, 126.0, 124.5, 120.0, 113.9, 109.7.

Elemental analysis: calcd (%)  $\text{C}_{15}\text{H}_{11}\text{BrN}_2$  for (299.17): C 60.22, H 3.71; found: C 60.53, H 2.74.

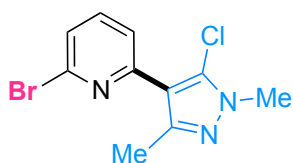

**2-Bromo-6-(5-chloro-1,3-dimethylpyrazol-4-yl)pyridine (10):** Following the general procedure **A** using 2,6-dibromopyridine (355 mg, 1.5 mmol) and 5-chloro-1,3-dimethylpyrazole (131 mg, 1 mmol), the residue was purified by flash chromatography on silica gel to afford the desired compound **10** (80 mg, 28%).

$^1\text{H}$  NMR (400 MHz,  $\text{CDCl}_3$ )  $\delta$  (ppm) 7.55 (t,  $J = 7.6$  Hz, 1H), 7.50 (dd,  $J = 1.1$  and 7.6 Hz, 1H), 7.34 (dd,  $J = 1.1$  and 7.6 Hz, 1H), 3.82 (s, 3H), 2.44 (s, 3H).

$^{13}\text{C}$  NMR (100 MHz,  $\text{CDCl}_3$ )  $\delta$  (ppm) 152.5, 148.0, 141.5, 138.4, 126.3, 125.3, 121.0, 115.2, 36.2, 14.1.

Elemental analysis: calcd (%)  $\text{C}_{10}\text{H}_9\text{BrClN}_3$  for (286.56): C 41.91, H 3.17; found: C 42.05, H 3.35.

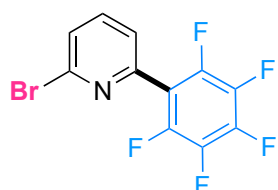

**2-Bromo-6-(perfluorophenyl)pyridine (11):** Following the general procedure **A** using 2,6-dibromopyridine (355 mg, 1.5 mmol) and 1,2,3,4,5-pentafluorobenzene (168 mg, 1 mmol), the residue was purified by flash chromatography on silica gel to afford the desired compound **11** (188 mg, 58%).

$^1\text{H}$  NMR (400 MHz,  $d_6$ -DMSO)  $\delta$  (ppm) 7.91 (t,  $J = 7.8$  Hz, 1H), 7.74 (d,  $J = 7.8$  Hz, 1H), 7.67 (d,  $J = 7.8$  Hz, 1H).

$^{13}\text{C}$  NMR (100 MHz,  $d_6$ -DMSO)  $\delta$  (ppm) 147.9, 144.1 (md,  $J = 246.0$  Hz), 141.0, 140.3, 138.6 (md,  $J = 243.2$  Hz), 138.3 (md,  $J = 243.2$  Hz), 128.1, 125.6, 107.3 (t,  $J = 16.8$  Hz).

Elemental analysis: calcd (%)  $\text{C}_{11}\text{H}_3\text{BrF}_5\text{N}$  for (324.05): C 40.77, H 0.93; found: C 41.02, H 1.07.

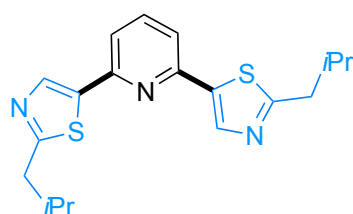

**2,6-Bis(2-isobutylthiazol-5-yl)pyridine (12):** Following the general procedure **B** using 2,6-dibromopyridine (237 mg, 1 mmol) and 2-isobutylthiazole (353 mg, 2.5 mmol), the residue was purified by flash chromatography on silica gel to afford the desired compound **12** (222 mg, 62%).

$^1\text{H}$  NMR (400 MHz,  $\text{CDCl}_3$ )  $\delta$  (ppm) 8.09 (s, 2H), 7.65 (t,  $J = 7.8$  Hz, 1H), 7.44 (d,  $J = 7.8$  Hz, 2H), 2.87 (d,  $J = 7.2$  Hz, 4H), 2.20-2.08 (m, 2H), 1.00 (d,  $J = 6.7$  Hz, 12H).

$^{13}\text{C}$  NMR (100 MHz,  $\text{CDCl}_3$ )  $\delta$  (ppm) 172.6, 150.8, 139.5, 139.1, 137.4, 117.6, 42.7, 29.9, 22.3.

Elemental analysis: calcd (%)  $\text{C}_{19}\text{H}_{23}\text{N}_3\text{S}_2$  for (357.53): C 63.83, H 6.48; found: C 64.05, H 6.59.

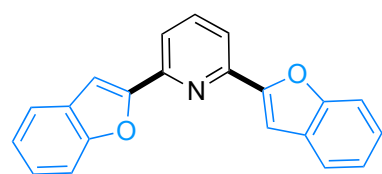

**2,6-Di(benzofuran-2-yl)pyridine (13):** Following the general procedure **B** using 2,6-dibromopyridine (237 mg, 1 mmol) and benzofuran (295 mg, 2.5 mmol), the residue was purified by flash chromatography on silica gel to afford the desired compound **13** (193 mg, 62%).

$^1\text{H}$  NMR (400 MHz,  $\text{CDCl}_3$ )  $\delta$  (ppm) 7.89-7.86 (m, 4H), 7.69 (d,  $J = 7.7$  Hz, 2H), 7.61 (s, 2H), 7.59 (d,  $J = 8.4$  Hz, 2H), 7.36 (t,  $J = 7.4$  Hz, 1H), 7.29 (d,  $J = 7.5$  Hz, 2H).

$^{13}\text{C}$  NMR (100 MHz,  $\text{CDCl}_3$ )  $\delta$  (ppm) 155.4, 155.1, 149.3, 137.5, 128.9, 125.2, 123.2, 121.8, 118.8, 111.5, 105.3.

Elemental analysis: calcd (%)  $\text{C}_{21}\text{H}_{13}\text{NO}_2$  for (311.34): C 81.01, H 4.21; found: C 81.26, H 4.49.

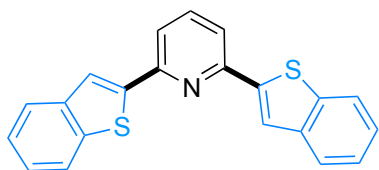

**2,6-Bis(benzo[b]thiophen-2-yl)pyridine (14):** Following the general procedure **B** using 2,6-dibromopyridine (237 mg, 1 mmol) and benzo[b]thiophene (336 mg, 2.5 mmol), the residue was purified by flash chromatography on silica gel to afford the desired compound **14** (192 mg,

56%).

$^1\text{H}$  NMR (400 MHz,  $\text{CDCl}_3$ )  $\delta$  (ppm) 7.92 (s, 2H), 7.89 (d,  $J = 3.7$  Hz, 1H), 7.86-7.82 (m, 2H), 7.81-7.75 (m, 2H), 7.70 (d,  $J = 7.5$  Hz, 2H), 7.40-7.35 (m, 4H).

$^{13}\text{C}$  NMR (100 MHz,  $\text{CDCl}_3$ )  $\delta$  (ppm) 152.3, 144.7, 141.0, 140.5, 137.3, 125.1, 124.5, 124.2, 122.6, 121.4, 118.1.

Elemental analysis: calcd (%)  $\text{C}_{21}\text{H}_{13}\text{NS}_2$  for (343.46): C 73.44, H 3.82; found: C 73.59, H 4.06.

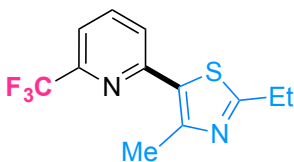

**2-Ethyl-4-methyl-5-(6-(trifluoromethyl)pyridin-2-yl)thiazole (15):** Following the general procedure **C** using 2-bromo-6-(trifluoromethyl)pyridine (272 mg, 1 mmol) and 2-ethyl-4-methylthiazole (191 mg, 1.5 mmol), the residue was purified by flash chromatography on silica gel to afford the desired compound **15** (250

mg, 92%).

$^1\text{H}$  NMR (400 MHz,  $\text{CDCl}_3$ )  $\delta$  (ppm) 7.85 (t,  $J = 7.9$  Hz, 1H), 7.64 (d,  $J = 8.0$  Hz, 1H), 7.50 (d,  $J = 7.7$  Hz, 1H), 2.99 (q,  $J = 7.6$  Hz, 2H), 2.69 (s, 3H), 1.39 (t,  $J = 7.6$  Hz, 3H).

$^{13}\text{C}$  NMR (100 MHz,  $\text{CDCl}_3$ )  $\delta$  (ppm) 172.7, 152.5, 151.0, 148.0 (q,  $J = 34.8$  Hz), 137.9, 130.0, 124.1, 121.3 (q,  $J = 276.5$  Hz), 117.6 (q,  $J = 2.7$  Hz), 27.0, 17.6, 14.1.

Elemental analysis: calcd (%)  $\text{C}_{12}\text{H}_{11}\text{F}_3\text{N}_2\text{S}$  for (272.29): C 52.93, H 4.07; found: C 53.12, H 4.29.

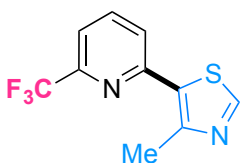

**4-Methyl-5-(6-(trifluoromethyl)pyridin-2-yl)thiazole (16):** Following the general procedure **C** using 2-bromo-6-(trifluoromethyl)pyridine (272 mg, 1 mmol) and 4-methylthiazole (150 mg, 1.5 mmol), the residue was purified by flash chromatography on silica gel to afford the desired compound **16** (220 mg, 90%).

$^1\text{H}$  NMR (400 MHz,  $\text{CDCl}_3$ )  $\delta$  (ppm) 8.73 (s, 1H), 7.90 (t,  $J = 7.9$  Hz, 1H), 7.71 (d,  $J = 7.9$  Hz, 1H), 7.55 (d,  $J = 7.9$  Hz, 1H), 2.76 (s, 3H).

$^{13}\text{C}$  NMR (100 MHz,  $\text{CDCl}_3$ )  $\delta$  (ppm) 152.5, 152.2, 152.1, 148.2 (q,  $J = 35.0$  Hz), 138.2, 131.1, 124.4, 121.3 (q,  $J = 276.5$  Hz), 118.2 (q,  $J = 2.7$  Hz), 17.6.

Elemental analysis: calcd (%)  $\text{C}_{10}\text{H}_7\text{F}_3\text{N}_2\text{S}$  for (244.24): C 49.18, H 2.89; found: C 49.35, H 3.12.

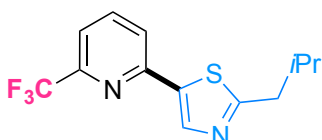

**2-Isobutyl-5-(6-(trifluoromethyl)pyridin-2-yl)thiazole (17):** Following the general procedure **C** using 2-bromo-6-(trifluoromethyl)pyridine (272 mg, 1 mmol) and 2-isobutylthiazole (212 mg, 1.5 mmol), the residue was purified by

flash chromatography on silica gel to afford the desired compound **17** (269 mg, 94%).

$^1\text{H}$  NMR (400 MHz,  $\text{CDCl}_3$ )  $\delta$  (ppm) 8.14 (s, 1H), 7.82 (t,  $J = 7.8$  Hz, 1H), 7.73 (d,  $J = 7.8$  Hz, 1H), 7.49 (d,  $J = 7.8$  Hz, 1H), 2.86 (d,  $J = 7.2$  Hz, 2H), 2.15-2.08 (m, 1H), 0.98 (d,  $J = 6.7$  Hz, 6H).

$^{13}\text{C}$  NMR (100 MHz,  $\text{CDCl}_3$ )  $\delta$  (ppm) 173.4, 151.4, 148.2 (q,  $J = 34.8$  Hz), 140.5, 138.1, 137.9, 121.9, 121.2 (q,  $J = 276.2$  Hz), 118.5 (q,  $J = 2.7$  Hz), 42.6, 30.3, 22.2.

Elemental analysis: calcd (%)  $\text{C}_{13}\text{H}_{13}\text{F}_3\text{N}_2\text{S}$  for (286.32): C 54.54, H 4.58; found: C 54.76, H 4.86.

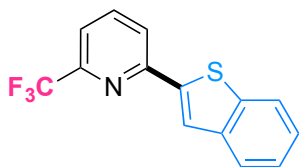

**2-(Benzo[b]thiophen-2-yl)-6-(trifluoromethyl)pyridine (18):** Following the general procedure **C** using 2-bromo-6-(trifluoromethyl)pyridine (272 mg, 1 mmol) and benzo[b]thiophene (201 mg, 1.5 mmol), the residue was purified by flash chromatography on silica gel to afford the desired compound **18** (190 mg, 68%).

$^1\text{H}$  NMR (400 MHz,  $\text{CDCl}_3$ )  $\delta$  (ppm) 7.94 (s, 1H), 7.91-7.81 (m, 4H), 7.57 (dd,  $J = 2.2$  and 6.4 Hz, 1H), 7.42-7.36 (m, 2H).

$^{13}\text{C}$  NMR (100 MHz,  $\text{CDCl}_3$ )  $\delta$  (ppm) 153.1, 148.2 (q,  $J = 34.8$  Hz), 143.0, 141.0, 140.2, 138.0, 125.8, 124.7, 124.5, 122.8, 122.6, 122.0, 121.3 (d,  $J = 276.6$  Hz), 118.8 (q,  $J = 2.8$  Hz).

Elemental analysis: calcd (%)  $\text{C}_{14}\text{H}_8\text{F}_3\text{NS}$  for (279.28): C 60.21, H 2.89; found: C 60.47, H 3.09.

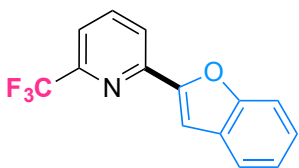

**2-(Benzofuran-2-yl)-6-(trifluoromethyl)pyridine (19):** Following the general procedure **C** using 2-bromo-6-(trifluoromethyl)pyridine (272 mg, 1 mmol) and benzofuran (177 mg, 1.5 mmol), the residue was purified by flash chromatography on silica gel to afford the desired compound **19** (155 mg, 59%).

$^1\text{H}$  NMR (400 MHz,  $\text{CDCl}_3$ )  $\delta$  (ppm) 8.08 (d,  $J = 8.0$  Hz, 1H), 7.96 (t,  $J = 8.0$  Hz, 1H), 7.72-7.66 (m, 1H), 7.63 (s, 1H), 7.59 (dd,  $J = 0.8$  and 9.2 Hz, 2H), 7.39 (ddd,  $J = 1.4$ , 7.3 and 8.3 Hz, 1H), 7.33-7.27 (m, 1H).

$^{13}\text{C}$  NMR (100 MHz,  $\text{CDCl}_3$ )  $\delta$  (ppm) 155.5, 153.8, 149.7, 148.5 (q,  $J = 34.9$  Hz), 138.2, 128.7, 125.7, 123.42, 122.0, 121.8, 121.4 (q,  $J = 270.8$  Hz), 119.1 (q,  $J = 2.7$  Hz), 111.5, 106.6.

Elemental analysis: calcd (%)  $\text{C}_{14}\text{H}_8\text{F}_3\text{NO}$  for (263.22): C 63.88, H 3.06; found: C 64.03, H 3.21.

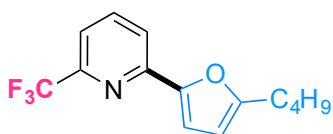

**2-(5-Butylfuran-2-yl)-6-(trifluoromethyl)pyridine (20):** Following the general procedure **C** using 2-bromo-6-(trifluoromethyl)pyridine (272 mg, 1 mmol) and 2-butylfuran (186 mg, 1.5 mmol), the residue was purified by flash chromatography on silica gel to afford the desired compound **20** (240 mg,

89%).

$^1\text{H}$  NMR (400 MHz,  $\text{CDCl}_3$ )  $\delta$  (ppm) 7.84-7.78 (m, 2H), 7.44 (dd,  $J = 1.2$  and 7.3 Hz, 1H), 7.11 (d,  $J = 3.3$  Hz, 1H), 6.15 (d,  $J = 3.3$  Hz, 1H), 2.72 (t,  $J = 7.6$  Hz, 2H), 1.73-1.66 (m, 2H), 1.43 (quint.,  $J = 7.4$  Hz, 2H), 0.95 (t,  $J = 7.4$  Hz, 3H).

$^{13}\text{C}$  NMR (100 MHz,  $\text{CDCl}_3$ )  $\delta$  (ppm) 158.8, 150.8, 150.1, 148.0 (q,  $J = 34.5$  Hz), 137.7, 122.9, 121.5 (q,  $J = 275.1$  Hz), 117.4 (q,  $J = 2.9$  Hz), 111.5, 107.9, 30.1, 28.0, 22.3, 13.8.

Elemental analysis: calcd (%)  $\text{C}_{14}\text{H}_{14}\text{F}_3\text{NO}$  for (269.26): C 62.45, H 5.24; found: C 62.58, H 5.37.

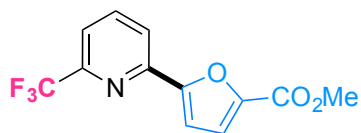

**Methyl 5-(6-(trifluoromethyl)pyridin-2-yl)furan-2-carboxylate (21):**

Following the general procedure **C** using 2-bromo-6-(trifluoromethyl)pyridine (272 mg, 1 mmol) and 2-butylfuran (189 mg, 1.5 mmol), the residue was purified by flash chromatography on silica gel to afford the desired

compound **21** (192 mg, 71%).

<sup>1</sup>H NMR (400 MHz, CDCl<sub>3</sub>) δ (ppm) 8.06 (d, *J* = 8.0 Hz, 1H), 7.94 (t, *J* = 8.0 Hz, 1H), 7.60 (d, *J* = 8.0 Hz, 1H), 7.28-7.26 (m, 2H), 3.93 (s, 3H).

<sup>13</sup>C NMR (100 MHz, CDCl<sub>3</sub>) δ (ppm) 158.9, 155.4, 148.6, 148.6 (q, *J* = 34.5 Hz), 145.0, 138.3, 121.8, 121.3 (q, *J* = 269.4 Hz), 119.9, 119.5 (q, *J* = 2.7 Hz), 111.8, 52.1.

Elemental analysis: calcd (%) C<sub>12</sub>H<sub>8</sub>F<sub>3</sub>NO<sub>3</sub> for (271.20): C 53.15, H 2.97; found: C 53.32, H 3.19.

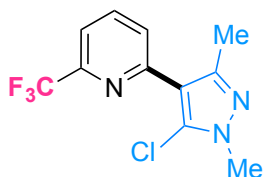

**2-(5-Chloro-1,3-dimethyl-1H-pyrazol-4-yl)-6-(trifluoromethyl)pyridine (22):**

Following the general procedure **C** using 2-bromo-6-(trifluoromethyl)pyridine (272 mg, 1 mmol) and 5-chloro-1,3-dimethylpyrazole (196 mg, 1.5 mmol), the residue was purified by flash chromatography on silica gel to afford the desired compound

**22** (234 mg, 85%).

<sup>1</sup>H NMR (400 MHz, CDCl<sub>3</sub>) δ (ppm) 7.88 (t, *J* = 7.9 Hz, 1H), 7.79 (d, *J* = 8.0 Hz, 1H), 7.55 (d, *J* = 7.1 Hz, 1H), 3.85 (s, 3H), 2.49 (s, 3H).

<sup>13</sup>C NMR (100 MHz, CDCl<sub>3</sub>) δ (ppm) 152.2, 148.5, 147.9 (q, *J* = 34.6 Hz), 137.5, 126.4, 124.6, 121.6 (q, *J* = 276.3 Hz), 117.4 (q, *J* = 2.7 Hz), 115.3, 36.2, 14.3.

Elemental analysis: calcd (%) C<sub>11</sub>H<sub>9</sub>ClF<sub>3</sub>N<sub>3</sub> for (275.66): C 47.93, H 3.29; found: C 47.81, H 3.08.

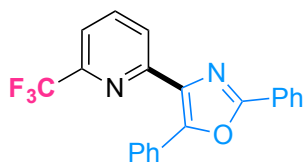

**2,5-Diphenyl-4-(6-(trifluoromethyl)pyridin-2-yl)oxazole (23):** Following the general procedure **C** using 2-bromo-6-(trifluoromethyl)pyridine (272 mg, 1 mmol) and 2,5-diphenyloxazole (332 mg, 1.5 mmol), the residue was purified by flash chromatography on silica gel to afford the desired compound **23** (311 mg, 85%).

<sup>1</sup>H NMR (400 MHz, CDCl<sub>3</sub>) δ (ppm) 8.36 (d, *J* = 8.2 Hz, 1H), 8.32 (dd, *J* = 1.8 and 7.8 Hz, 2H), 8.23-8.19 (m, 2H), 7.98 (t, *J* = 8.0 Hz, 1H), 7.64 (d, *J* = 7.3 Hz, 1H), 7.57-7.43 (m, 6H).

<sup>13</sup>C NMR (100 MHz, CDCl<sub>3</sub>) δ (ppm) 159.8, 152.5, 149.6, 147.2 (q, *J* = 34.9 Hz), 137.9, 134.9, 130.6, 129.4, 128.9, 128.4, 128.2, 128.1, 127.0, 126.6, 125.3, 121.6 (q, *J* = 273.5 Hz), 118.9 (q, *J* = 2.7 Hz).

Elemental analysis: calcd (%) C<sub>21</sub>H<sub>13</sub>F<sub>3</sub>N<sub>2</sub>O for (366.34): C 68.85, H 3.58; found: C 68.65, H 3.91.

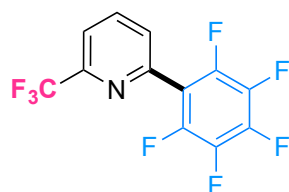

**2-(Perfluorophenyl)-6-(trifluoromethyl)pyridine (24):** Following the general procedure **C** using 2-bromo-6-(trifluoromethyl)pyridine (272 mg, 1 mmol) and 1,2,3,4,5-pentafluorobenzene (252 mg, 1.5 mmol), the residue was purified by flash chromatography on silica gel to afford the desired compound **24** (266 mg, 85%).

<sup>1</sup>H NMR (400 MHz, *d*<sub>6</sub>-DMSO) δ (ppm) 7.98 (t, *J* = 7.9 Hz, 1H), 7.70 (d, *J* = 7.9 Hz, 1H), 7.65 (d, *J* = 7.9 Hz, 1H).



$^{13}\text{C}$  NMR (100 MHz,  $d_6$ -DMSO)  $\delta$  (ppm) 148.5, 147.2 (q,  $J = 34.5$  Hz), 144.7 (dm,  $J = 245.8$  Hz), 140.1, 138.6 (tdd,  $J = 5.3, 12.7$  and 238.9 Hz), 138.1 (tt,  $J = 4.8$  and 13.8 Hz), 129.9, 121.8 (q,  $J = 270.0$  Hz), 121.0, 107.9 (t,  $J = 16.3$  Hz).

Elemental analysis: calcd (%)  $\text{C}_{12}\text{H}_3\text{F}_8\text{N}$  for (313.15): C 46.03, H 0.97; found: C 46.29, H 0.58.

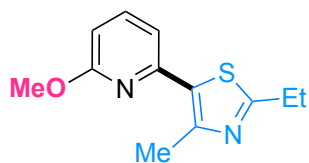

**2-Ethyl-5-(6-methoxypyridin-2-yl)-4-methylthiazole (25):** Following the general procedure **C** using 2-bromo-6-methoxypyridine (188 mg, 1 mmol) and 2-ethyl-4-methylthiazole (191 mg, 1.5 mmol), the residue was purified by flash chromatography on silica gel to afford the desired compound **25** (124 mg, 53%).

$^1\text{H}$  NMR (400 MHz,  $\text{CDCl}_3$ )  $\delta$  (ppm) 7.56 (t,  $J = 7.8$  Hz, 1H), 7.06 (d,  $J = 7.4$  Hz, 1H), 6.61 (d,  $J = 8.2$  Hz, 1H), 3.96 (s, 3H), 2.99 (q,  $J = 7.6$  Hz, 2H), 2.69 (s, 3H), 1.40 (t,  $J = 7.6$  Hz, 3H).

$^{13}\text{C}$  NMR (100 MHz,  $\text{CDCl}_3$ )  $\delta$  (ppm) 171.4, 163.4, 149.2, 149.1, 139.0, 131.7, 114.2, 108.7, 53.4, 27.0, 17.7, 14.2.

Elemental analysis: calcd (%)  $\text{C}_{12}\text{H}_{14}\text{N}_2\text{OS}$  for (234.32): C 61.51, H 6.02; found: C 62.84, H 6.29.

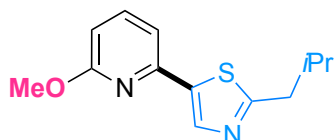

**2-Isobutyl-5-(6-methoxypyridin-2-yl)thiazole (26):** Following the general procedure **C** using 2-bromo-6-methoxypyridine (188 mg, 1 mmol) and 2-isobutylthiazole (212 mg, 1.5 mmol), the residue was purified by flash chromatography on silica gel to afford the desired compound **26** (154 mg,

62%).

$^1\text{H}$  NMR (400 MHz,  $\text{CDCl}_3$ )  $\delta$  (ppm) 8.10 (s, 1H), 7.56 (t,  $J = 7.8$  Hz, 1H), 7.18 (d,  $J = 7.4$  Hz, 1H), 6.62 (d,  $J = 8.2$  Hz, 1H), 3.97 (s, 3H), 2.89 (d,  $J = 7.2$  Hz, 2H), 2.17-2.10 (m, 1H), 1.03 (d,  $J = 6.6$  Hz, 6H).

$^{13}\text{C}$  NMR (100 MHz,  $\text{CDCl}_3$ )  $\delta$  (ppm) 171.7, 163.7, 148.2, 139.4, 139.1, 112.1, 109.5, 53.4, 42.7, 29.9, 22.3.

Elemental analysis: calcd (%)  $\text{C}_{13}\text{H}_{16}\text{N}_2\text{OS}$  for (248.34): C 62.87, H 6.49; found: C 62.91, H 6.59.

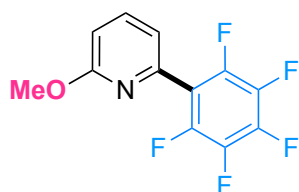

**2-Methoxy-6-(perfluorophenyl)pyridine (27):** Following the general procedure **C** using 2-bromo-6-methoxypyridine (188 mg, 1 mmol) and 1,2,3,4,5-pentafluorobenzene (252 mg, 1.5 mmol), the residue was purified by flash chromatography on silica gel to afford the desired compound **27** (88 mg, 32%).

$^1\text{H}$  NMR (400 MHz,  $d_6$ -DMSO)  $\delta$  (ppm) 7.84 (t,  $J = 7.8$  Hz, 1H), 7.18 (d,  $J = 7.3$  Hz, 1H), 6.89 (d,  $J = 8.3$  Hz, 1H), 3.85 (s, 3H).

$^{13}\text{C}$  NMR (100 MHz,  $d_6$ -DMSO)  $\delta$  (ppm) 163.3, 144.5, 144.2 (md,  $J = 241.5$  Hz), 139.7, 138.2 (md,  $J = 239.7$  Hz), 138.0 (md,  $J = 239.7$  Hz), 119.1, 110.6, 108.6 (t,  $J = 18.7$  Hz), 53.2.

Elemental analysis: calcd (%)  $\text{C}_{12}\text{H}_6\text{F}_5\text{NO}$  for (275.18): C 52.38, H 2.20; found: C 52.49, H 2.49.

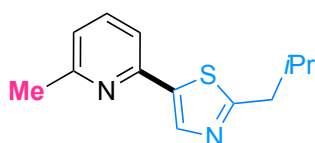

**2-Isobutyl-5-(6-methylpyridin-2-yl)thiazole (28):** Following the general procedure **C** using 2-bromo-6-methylpyridine (172 mg, 1 mmol) and 2-isobutylthiazole (212 mg, 1.5 mmol), the residue was purified by flash chromatography on silica gel to afford the desired compound **28** (84 mg, 36%).



$^1\text{H}$  NMR (400 MHz,  $\text{CDCl}_3$ )  $\delta$  (ppm) 8.09 (s, 1H), 7.6 (t,  $J = 7.7$  Hz, 1H), 7.45 (d,  $J = 7.8$  Hz, 1H), 7.05 (d,  $J = 7.5$  Hz, 1H), 2.91 (d,  $J = 7.3$  Hz, 2H), 2.58 (s, 3H), 2.24-2.10 (m, 1H), 1.04 (d,  $J = 6.7$  Hz, 6H).

$^{13}\text{C}$  NMR (100 MHz,  $\text{CDCl}_3$ )  $\delta$  (ppm) 171.9, 158.8, 150.2, 139.7, 139.0, 136.9, 121.9, 116.6, 42.7, 29.9, 24.5, 22.4.

Elemental analysis: calcd (%)  $\text{C}_{13}\text{H}_{16}\text{N}_2\text{S}$  for (232.34): C 67.20, H 6.94; found: C 67.49, H 7.18.

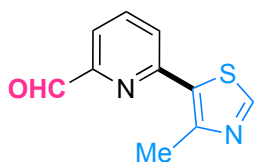

**6-(4-Methylthiazol-5-yl)picolinaldehyde (29):** Following the general procedure **C** using 6-bromopicolinaldehyde (186 mg, 1 mmol) and 4-methylthiazole (150 mg, 1.5 mmol), the residue was purified by flash chromatography on silica gel to afford the desired compound **29** (86 mg, 42%).

$^1\text{H}$  NMR (400 MHz,  $\text{CDCl}_3$ )  $\delta$  (ppm) 10.11 (s, 1H), 8.80 (s, 1H), 7.97 (t,  $J = 7.6$  Hz, 1H), 7.90 (d,  $J = 7.7$  Hz, 1H), 7.82 (d,  $J = 7.7$  Hz, 1H), 2.80 (s, 3H).

$^{13}\text{C}$  NMR (100 MHz,  $\text{CDCl}_3$ )  $\delta$  (ppm) 193.2, 152.8, 152.7, 152.6, 152.3, 151.4, 137.9, 125.8, 119.4, 17.7.

Elemental analysis: calcd (%)  $\text{C}_{10}\text{H}_8\text{N}_2\text{OS}$  for (204.25): C 58.81, H 3.95; found: C 58.54, H 4.24.

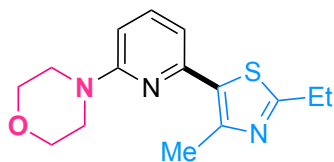

**4-(6-(2-Ethyl-4-methylthiazol-5-yl)pyridin-2-yl)morpholine (30):** Following the general procedure **C** using 4-(6-bromopyridin-2-yl)morpholine (243 mg, 1 mmol) and 2-ethyl-4-methylthiazole (191 mg, 1.5 mmol), the residue was purified by flash chromatography on silica gel to afford the desired compound

**30** (255 mg, 88%).

$^1\text{H}$  NMR (400 MHz,  $\text{CDCl}_3$ )  $\delta$  (ppm) 7.50 (dd,  $J = 7.5$  and 8.5 Hz, 1H), 6.89 (d,  $J = 7.5$  Hz, 1H), 6.49 (d,  $J = 8.5$  Hz, 1H), 3.82 (dd,  $J = 4.6$  and 5.5 Hz, 4H), 3.53 (dd,  $J = 4.1$  and 5.6 Hz, 4H), 2.97 (q,  $J = 7.6$  Hz, 2H), 2.65 (s, 3H), 1.38 (t,  $J = 7.6$  Hz, 3H).

$^{13}\text{C}$  NMR (75 MHz,  $\text{CDCl}_3$ )  $\delta$  (ppm) 171.4, 158.9, 149.9, 148.6, 138.2, 132.9, 111.4, 104.8, 66.8, 45.5, 27.1, 17.9, 14.4.

Elemental analysis: calcd (%)  $\text{C}_{15}\text{H}_{19}\text{N}_3\text{OS}$  for (289.40): C 62.26, H 6.62; found: C 62.37, H 6.20.

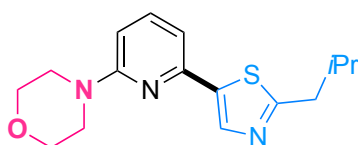

**4-(6-(2-Isobutylthiazol-5-yl)pyridin-2-yl)morpholine (31):** Following the general procedure **C** using 4-(6-bromopyridin-2-yl)morpholine (243 mg, 1 mmol) and 2-isobutylthiazole (212 mg, 1.5 mmol), the residue was purified by flash chromatography on silica gel to afford the desired compound **31**

(264 mg, 87%).

$^1\text{H}$  NMR (400 MHz,  $\text{CDCl}_3$ )  $\delta$  (ppm) 8.04 (s, 1H), 7.49 (dd,  $J = 7.5$  and 8.6 Hz, 1H), 7.00 (d,  $J = 7.5$  Hz, 1H), 6.50 (d,  $J = 8.6$  Hz, 1H), 3.83 (dd,  $J = 4.0$  and 5.3 Hz, 4H), 3.54 (dd,  $J = 4.0$  and 5.3 Hz, 4H), 2.86 (d,  $J = 7.2$  Hz, 2H), 2.23-2.05 (m, 1H), 1.01 (d,  $J = 6.7$  Hz, 6H).

$^{13}\text{C}$  NMR (75 MHz,  $\text{CDCl}_3$ )  $\delta$  (ppm) 171.7, 159.1, 148.9, 140.5, 138.8, 138.3, 109.2, 105.4, 66.9, 45.4, 42.8, 30.0, 22.4.

Elemental analysis: calcd (%)  $\text{C}_{16}\text{H}_{21}\text{N}_3\text{OS}$  for (303.42): C 63.34, H 6.98; found: C 63.54, H 7.18.

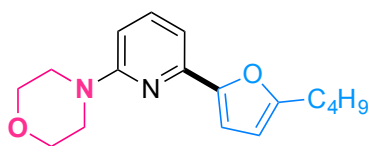

**4-(6-(5-Butylfuran-2-yl)pyridin-2-yl)morpholine (32):** Following the general procedure **C** using 4-(6-bromopyridin-2-yl)morpholine (243 mg, 1 mmol) and 2-butylfuran (186 mg, 1.5 mmol), the residue was purified by flash chromatography on silica gel to afford the desired compound **32** (218 mg, 76%).

$^1\text{H}$  NMR (400 MHz,  $\text{CDCl}_3$ )  $\delta$  (ppm) 7.53 (dd,  $J = 7.6$  and  $8.4$  Hz, 1H), 7.07 (d,  $J = 7.6$  Hz, 1H), 6.90 (d,  $J = 3.3$  Hz, 1H), 6.50 (d,  $J = 8.4$  Hz, 1H), 6.11 (d,  $J = 3.3$  Hz, 1H), 3.87 (dd,  $J = 4.3$  and  $5.6$  Hz, 4H), 3.57 (dd,  $J = 4.3$  and  $5.6$  Hz, 4H), 2.71 (t,  $J = 7.5$  Hz, 2H), 1.69 (quint.,  $J = 7.5$  Hz, 2H), 1.49-1.41 (m, 2H), 0.96 (t,  $J = 7.3$  Hz, 3H).

$^{13}\text{C}$  NMR (75 MHz,  $\text{CDCl}_3$ )  $\delta$  (ppm) 170.9, 159.2, 152.8, 148.0, 138.2, 125.8, 115.8, 108.4, 105.0, 67.0, 45.8, 30.4, 28.2, 22.5, 14.0.

Elemental analysis: calcd (%)  $\text{C}_{17}\text{H}_{22}\text{N}_2\text{O}_2$  for (286.38): C 71.30, H 7.74; found: C 71.56, H 7.58.

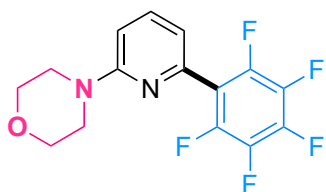

**4-(6-(Perfluorophenyl)pyridin-2-yl)morpholine (33):** Following the general procedure **C** using 4-(6-bromopyridin-2-yl)morpholine (243 mg, 1 mmol) and 1,2,3,4,5-pentafluorobenzene (252 mg, 1.5 mmol), the residue was purified by flash chromatography on silica gel to afford the desired compound **33** (211 mg, 64%).

$^1\text{H}$  NMR (400 MHz,  $\text{CDCl}_3$ )  $\delta$  (ppm) 7.32 (t,  $J = 7.9$  Hz, 1H), 6.80 (d,  $J = 7.6$  Hz, 1H), 6.52 (d,  $J = 8.6$  Hz, 1H), 3.83 (dd,  $J = 4.3$  and  $5.6$  Hz, 4H), 3.52 (dd,  $J = 4.3$  and  $5.6$  Hz, 4H),

$^{13}\text{C}$  NMR (75 MHz,  $\text{CDCl}_3$ )  $\delta$  (ppm) 171.6, 159.3, 144.9 (dm,  $J = 250.1$  Hz), 138.2 (dm,  $J = 249.8$  Hz), 127.8 (dm,  $J = 248.9$  Hz), 138.0, 115.6, 107.1, 102.0 (t,  $J = 25.0$  Hz), 66.6, 45.3.

Elemental analysis: calcd (%)  $\text{C}_{15}\text{H}_{11}\text{F}_5\text{N}_2\text{O}$  for (330.25): C 54.55, H 3.36; found: C 54.20, H 3.43.

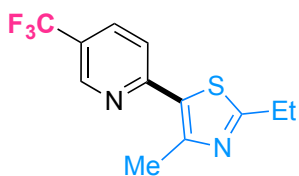

**2-Ethyl-4-methyl-5-(5-(trifluoromethyl)pyridin-2-yl)thiazole (34):** The reaction of 2-bromo-5-(trifluoromethyl)pyridine (226 mg, 1 mmol), 2-ethyl-4-methylthiazole (191 mg, 1.5 mmol), KOAc (196 mg, 2 equiv.) at  $150^\circ\text{C}$  during 16 h in DMA (4 mL) in the presence of  $\text{PdCl}(\text{C}_3\text{H}_5)(\text{dppb})$  (12 mg, 2 mol%) under argon affords after evaporation of the solvent and purification by silica column

chromatography the desired product **34** (142 mg, 52%).

$^1\text{H}$  NMR (400 MHz,  $\text{CDCl}_3$ )  $\delta$  (ppm) 8.78 (s, 1H), 7.87 (dd,  $J = 2.4$  and  $8.4$  Hz, 1H), 7.57 (d,  $J = 8.4$  Hz, 1H), 2.95 (q,  $J = 7.6$  Hz, 2H), 2.63 (s, 3H), 1.35 (t,  $J = 7.6$  Hz, 3H).

$^{13}\text{C}$  NMR (100 MHz,  $\text{CDCl}_3$ )  $\delta$  (ppm) 173.7, 155.5, 151.1, 146.7 (q,  $J = 4.1$  Hz), 134.0 (q,  $J = 3.5$  Hz), 131.0, 124.2 (q,  $J = 28.6$  Hz), 123.7 (q,  $J = 273.5$  Hz), 120.9, 27.3, 18.0, 14.3.

Elemental analysis: calcd (%)  $\text{C}_{12}\text{H}_{11}\text{F}_3\text{N}_2\text{S}$  for (272.28): C 52.93, H 4.07; found: C 53.17, H 4.01.

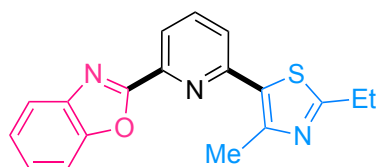

**2-(6-(2-Ethyl-4-methylthiazol-5-yl)pyridin-2-yl)benzoxazole (38):** The reaction of 5-(6-bromopyridin-2-yl)-2-ethyl-4-methylthiazole (**2**) (283 mg, 1 mmol), benzoxazole (179 mg, 1.5 mmol),  $\text{Cs}_2\text{CO}_3$  (650 mg, 2 equiv.) at

150 °C during 16 h in DMF (4 mL) in the presence of PdCl(C<sub>3</sub>H<sub>5</sub>)(dppb)<sup>1</sup> (12 mg, 2 mol%) under argon affords after evaporation of the solvent and purification by silica column chromatography the desired product **38** (238 mg, 74%).

<sup>1</sup>H NMR (400 MHz, CDCl<sub>3</sub>) δ (ppm) 8.25 (d, *J* = 7.8 Hz, 1H), 7.92 (t, *J* = 7.8 Hz, 1H), 7.86 (dd, *J* = 2.1 and 7.3 Hz, 1H), 7.71-7.68 (m, 1H), 7.66 (d, *J* = 7.8 Hz, 1H), 7.47-7.36 (m, 2H), 3.06 (q, *J* = 7.6 Hz, 2H), 2.76 (s, 3H), 1.44 (t, *J* = 7.6 Hz, 3H).

<sup>13</sup>C NMR (100 MHz, CDCl<sub>3</sub>) δ (ppm) 172.7, 161.3, 152.6, 151.2, 150.1, 146.1, 141.8, 137.7, 131.0, 126.1, 124.9, 123.6, 121.3, 120.7, 111.4, 27.1, 17.4, 14.3.

Elemental analysis: calcd (%) C<sub>18</sub>H<sub>15</sub>N<sub>3</sub>OS for (321.39): C 67.27, H 4.70; found: C 67.39, H 4.55.

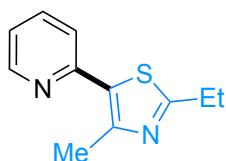

**2-Ethyl-4-methyl-5-(pyridin-2-yl)thiazole (1):** Autoclave was charged with 5-(6-bromopyridin-2-yl)-2-ethyl-4-methylthiazole (**2**) (283 mg, 1 mmol), Et<sub>3</sub>N (270 μL; 2 mmol), Pd/C (29 mg, 10% of the weight of the 2-bromopyridine derivative) and MeOH (5 mL) and pressurized with hydrogen (3-5 bar). The crude mixture was stirred at 20

°C during 16 h, and then the reaction was cooled down and filtered in the pad of Celite. After evaporation of the solvent and purification on silica gel **1** was isolated in 96% (0.196 g) yield.

<sup>1</sup>H NMR (400 MHz, CDCl<sub>3</sub>) δ (ppm) 8.51 (d, *J* = 4.9 Hz, 1H), 7.62 (ddd, *J* = 1.9, 7.5 and 8.0 Hz, 1H), 7.44 (d, *J* = 8.0 Hz, 1H), 7.06 (dd, *J* = 4.9 and 7.5 Hz, 1H), 2.91 (q, *J* = 7.6 Hz, 2H), 2.56 (s, 3H), 1.31 (t, *J* = 7.6 Hz, 3H).

<sup>13</sup>C NMR (100 MHz, CDCl<sub>3</sub>) δ (ppm) 172.1, 152.0, 149.8, 148.9, 136.6, 132.1, 121.6, 121.6, 27.1, 17.5, 14.3.

Elemental analysis: calcd (%) C<sub>11</sub>H<sub>12</sub>N<sub>2</sub>S for (204.29): C 64.67, H 5.92; found: C 64.98, H 6.27.

<sup>1</sup> Cantat, T.; Génin, E.; Giroud, C.; Meyer, G.; Jutand, A. *J. Organomet. Chem.* **2003**, 687, 365-376.

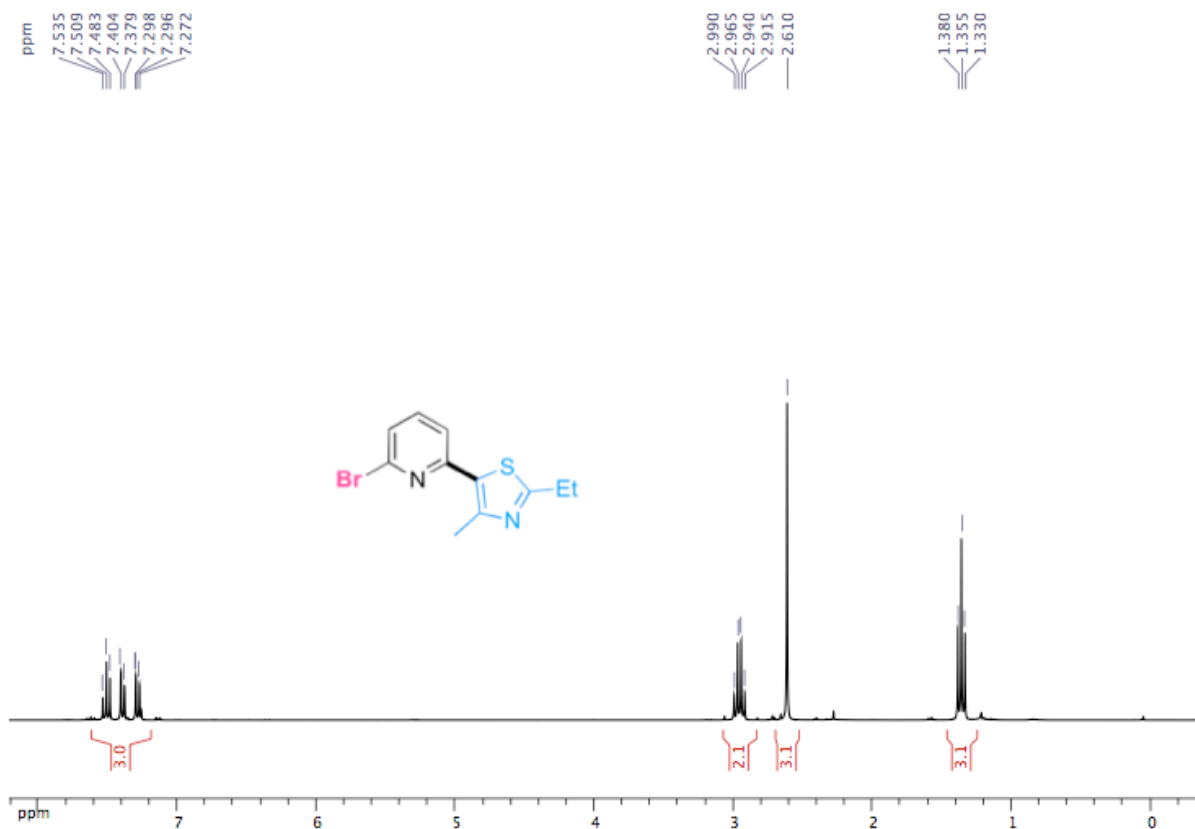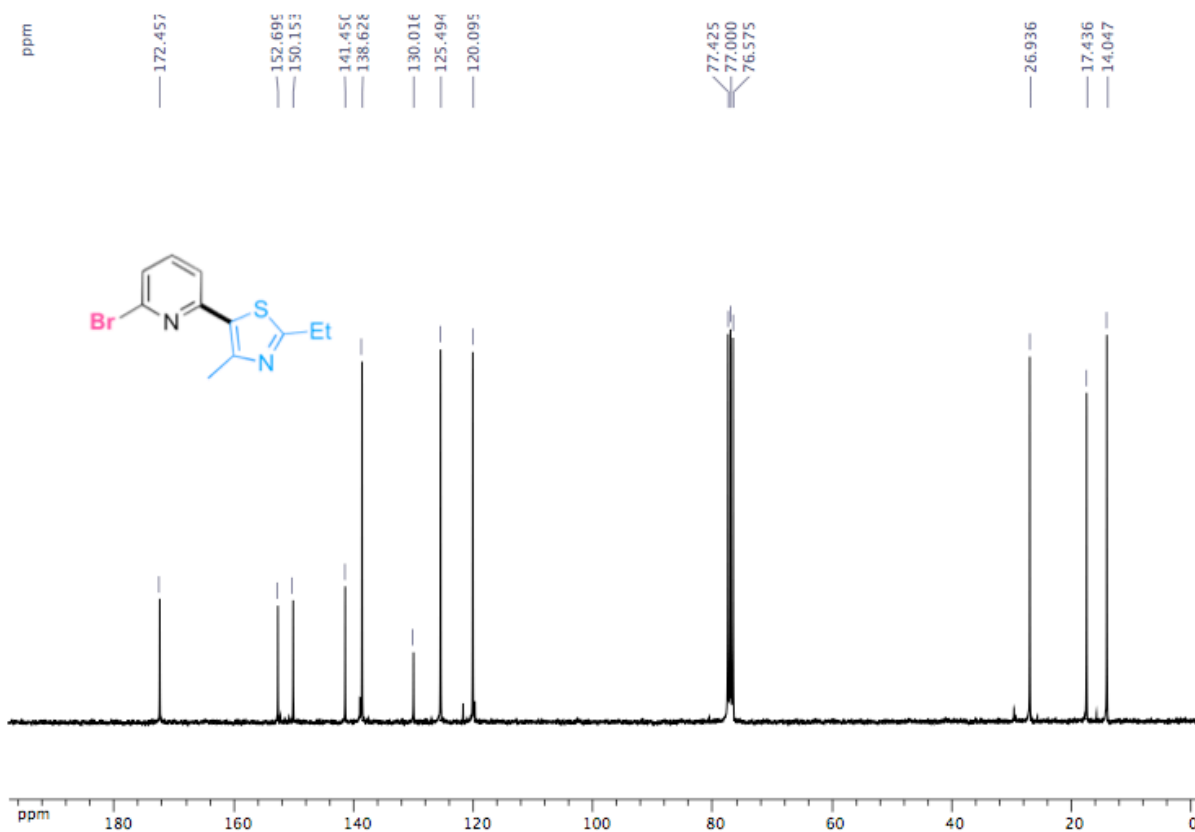

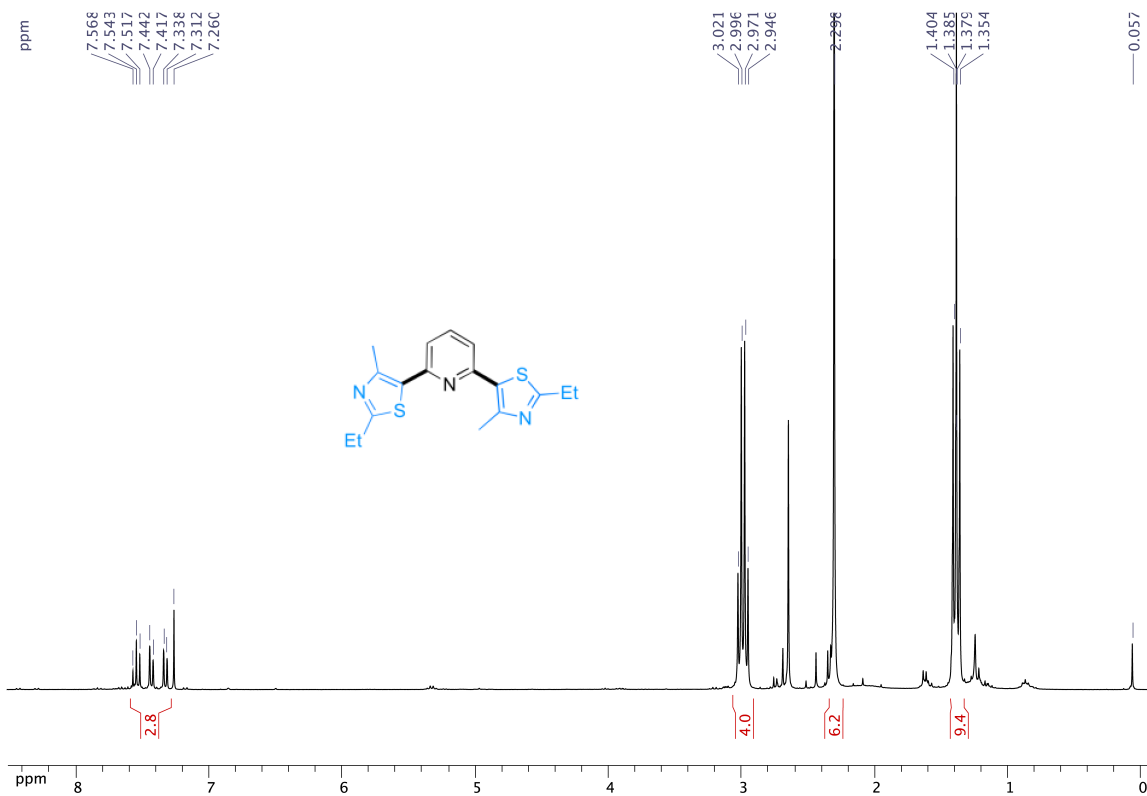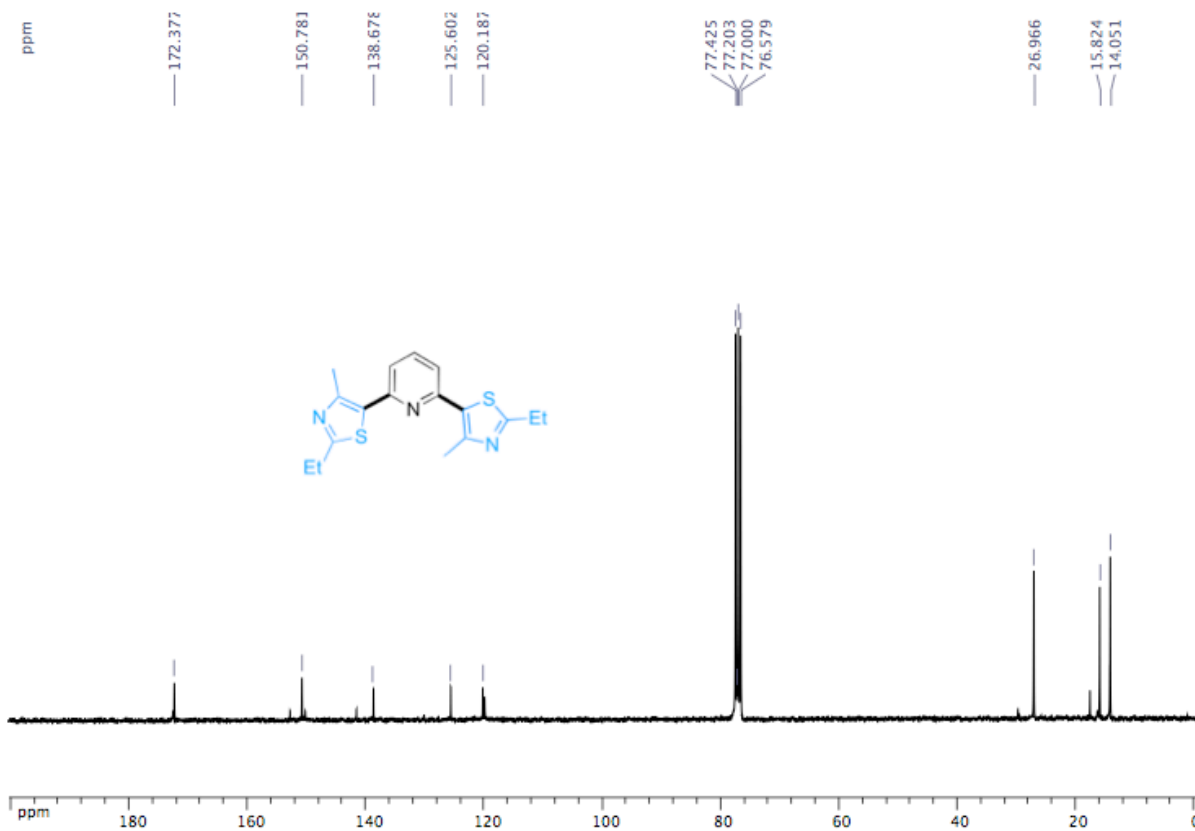

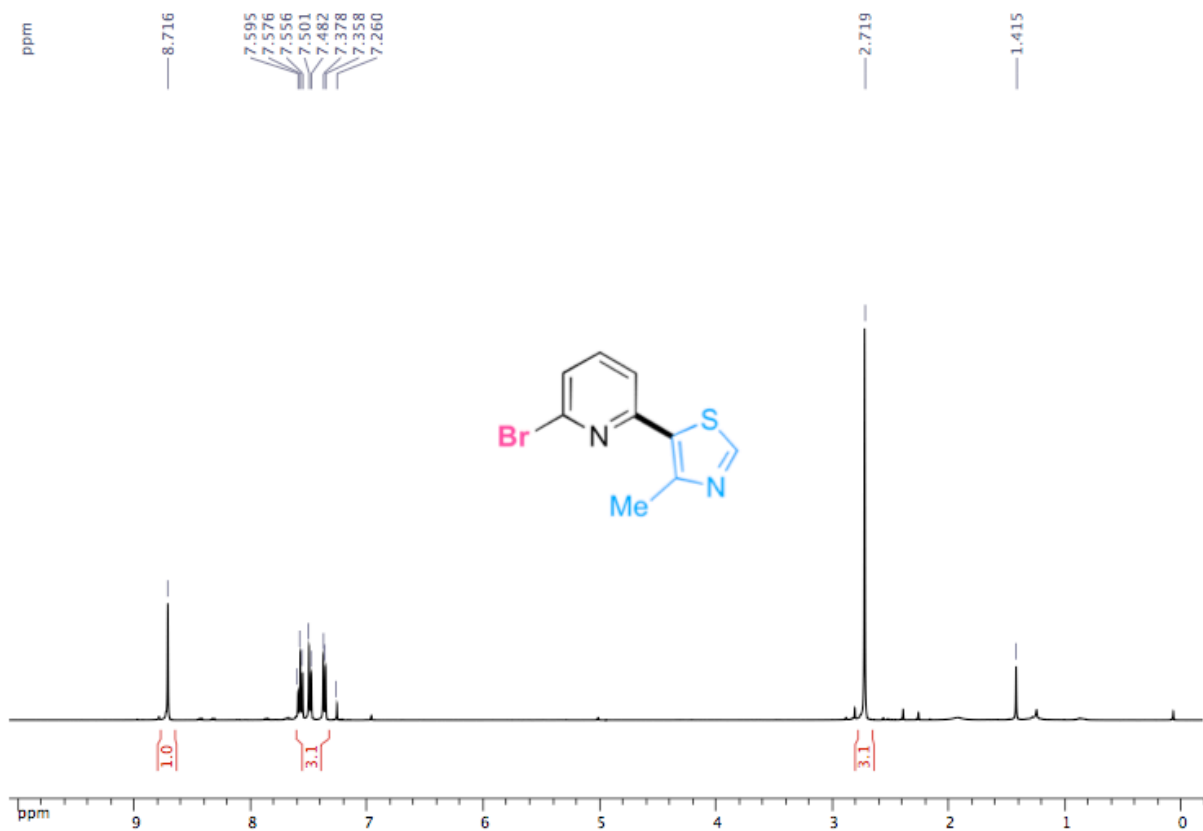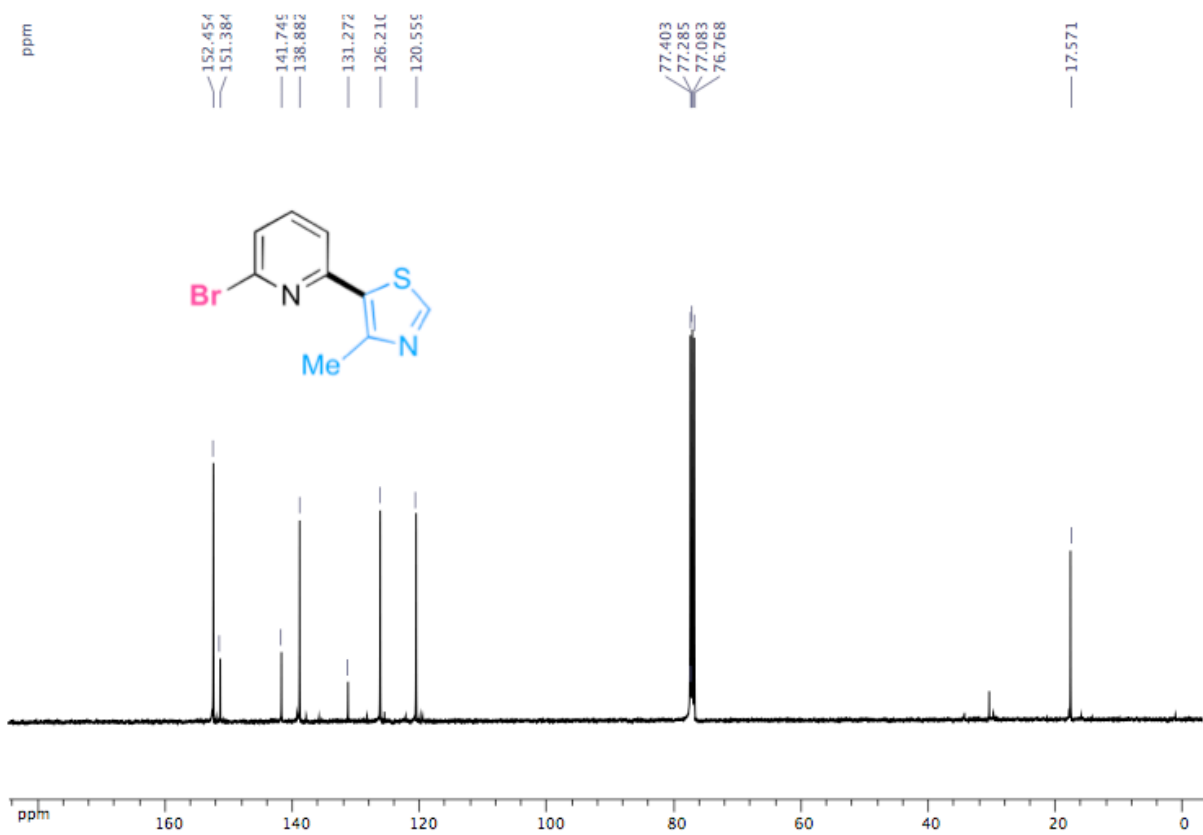

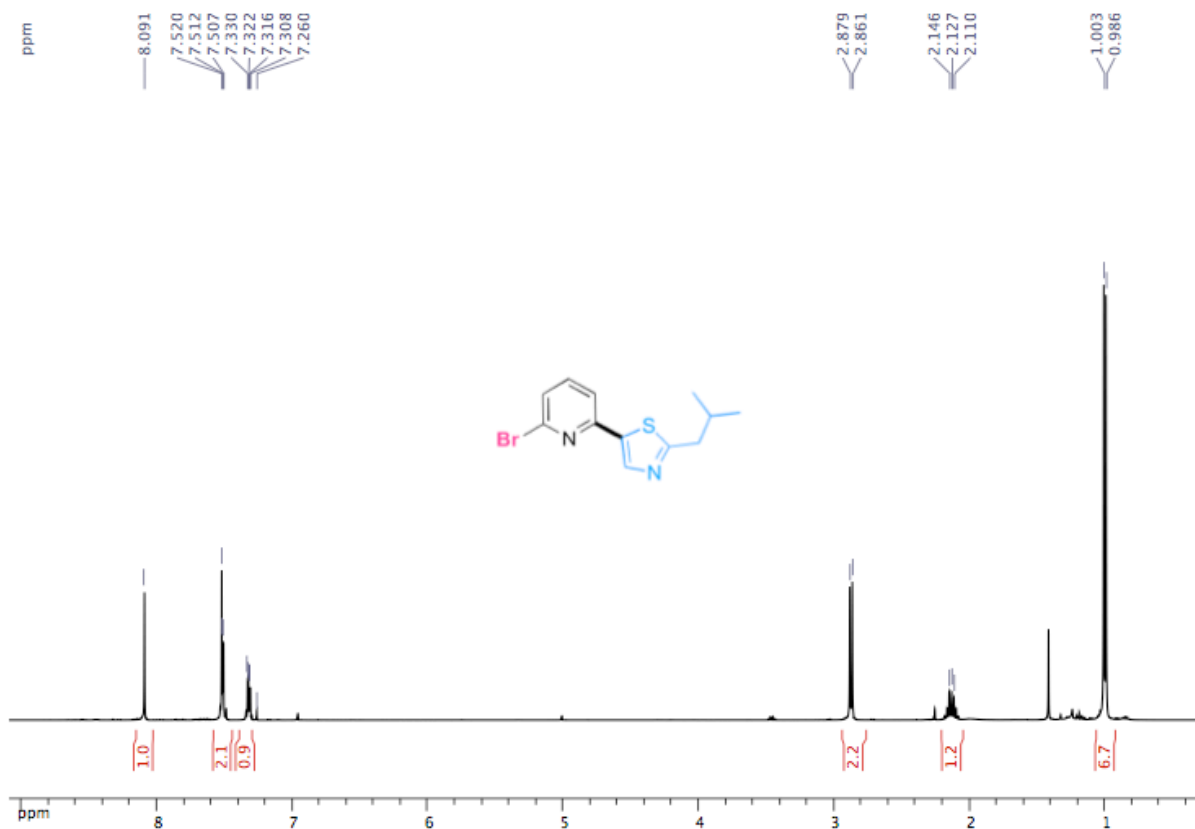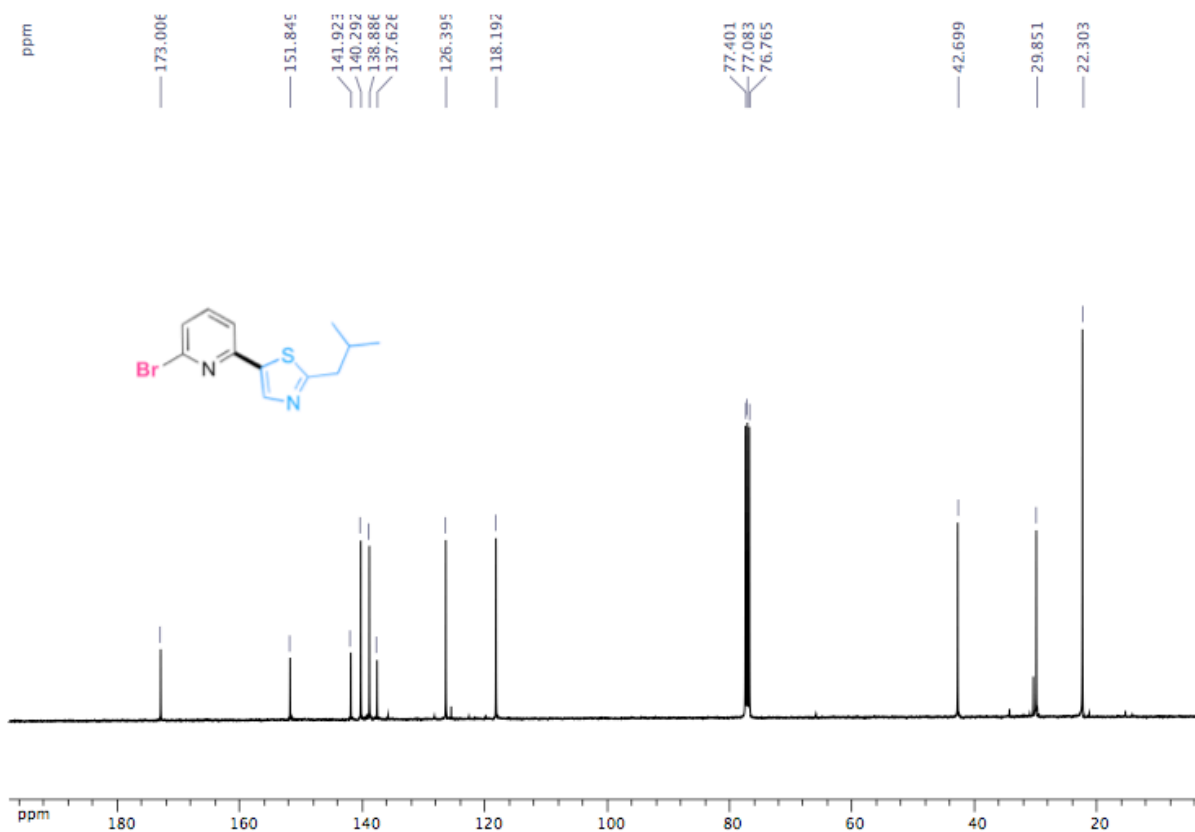



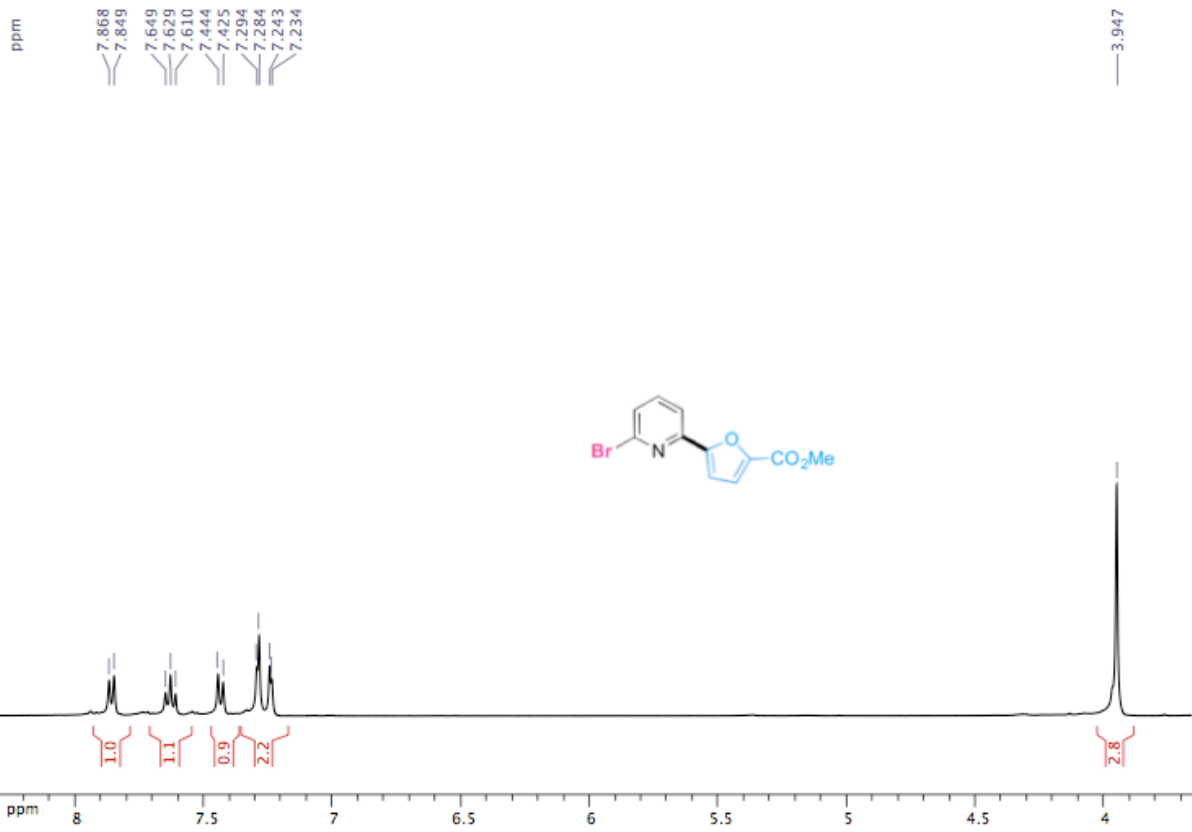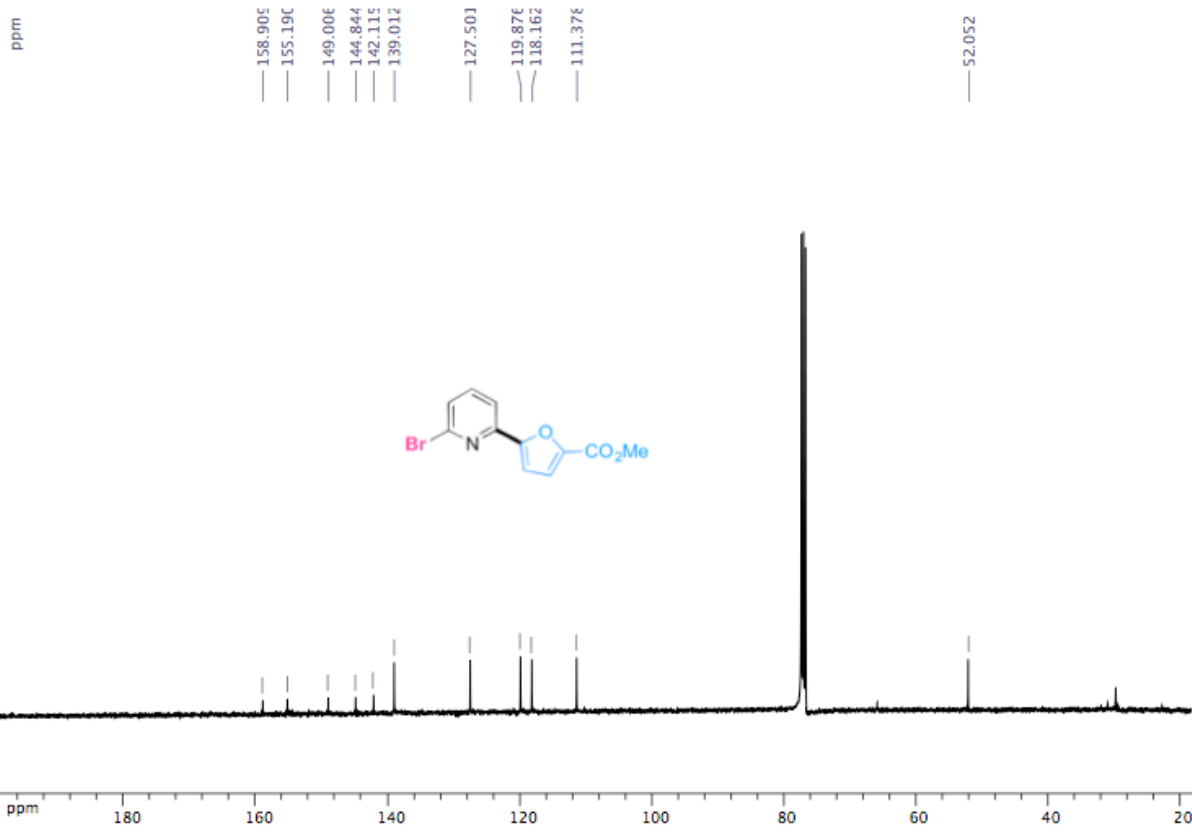

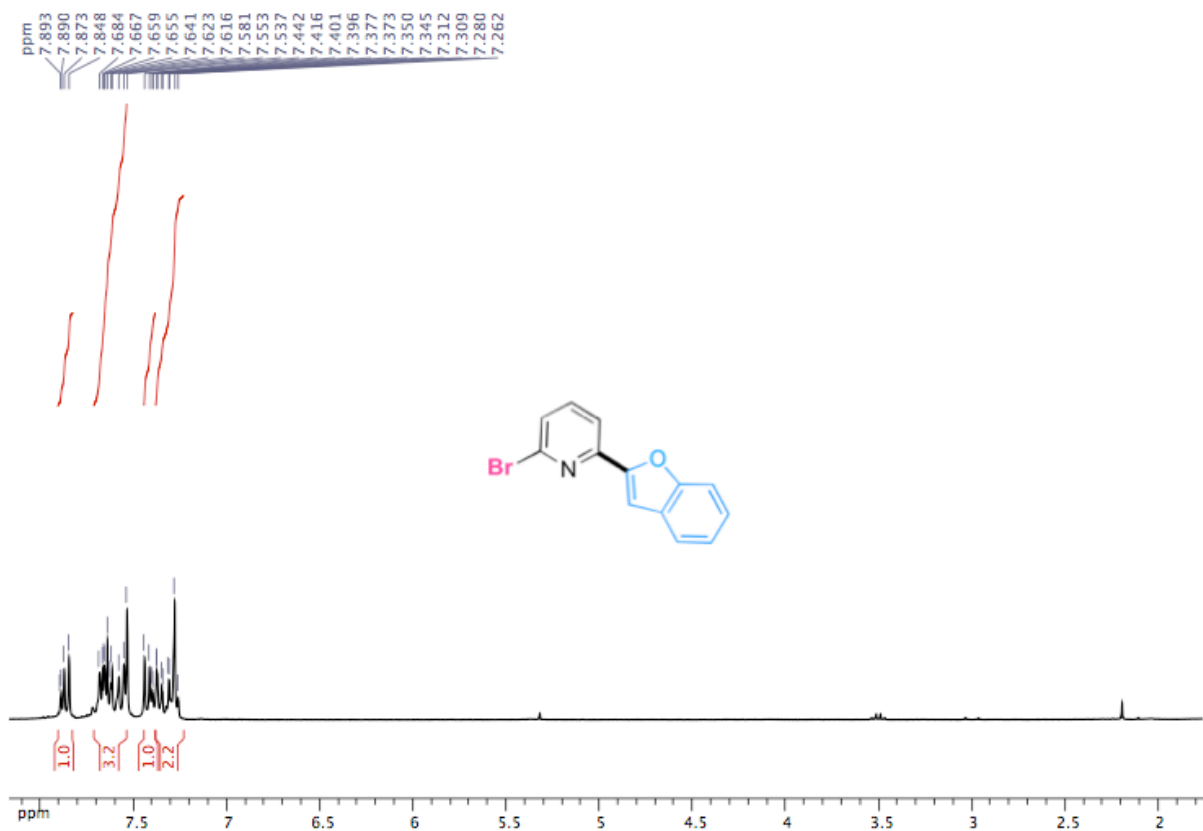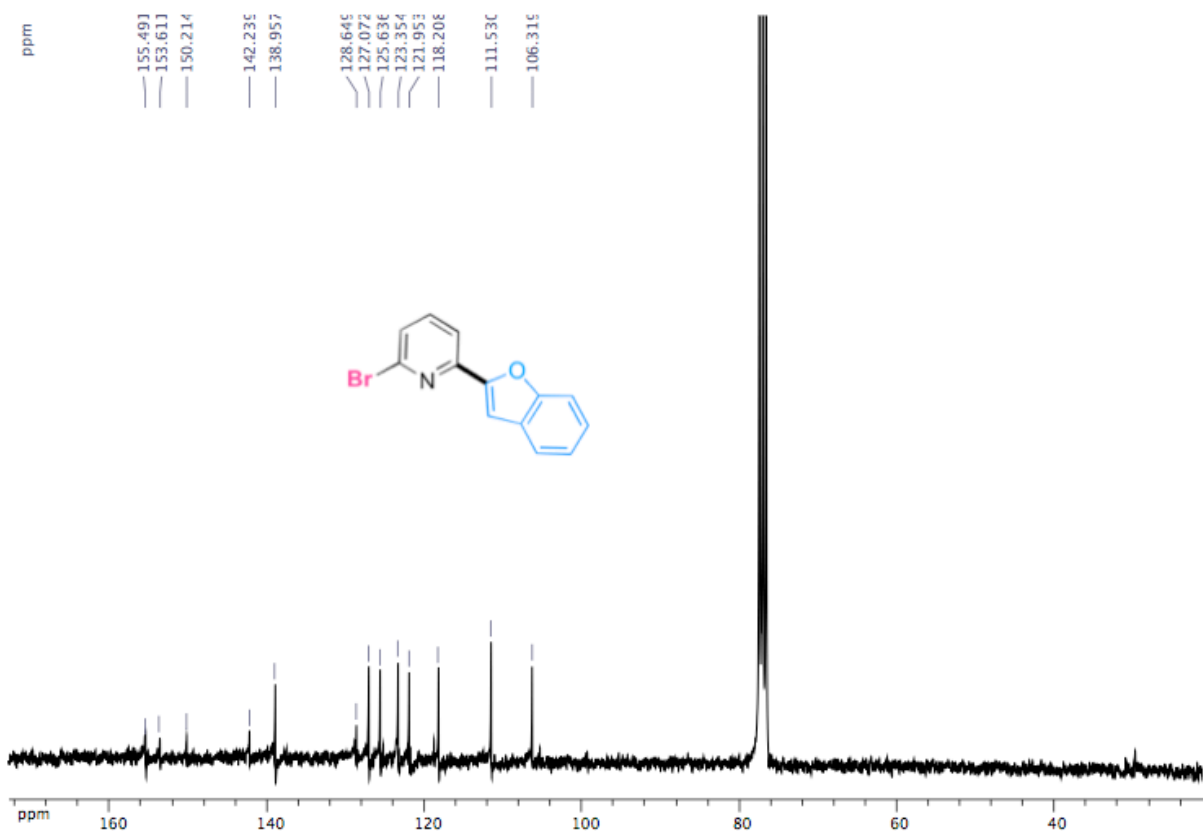

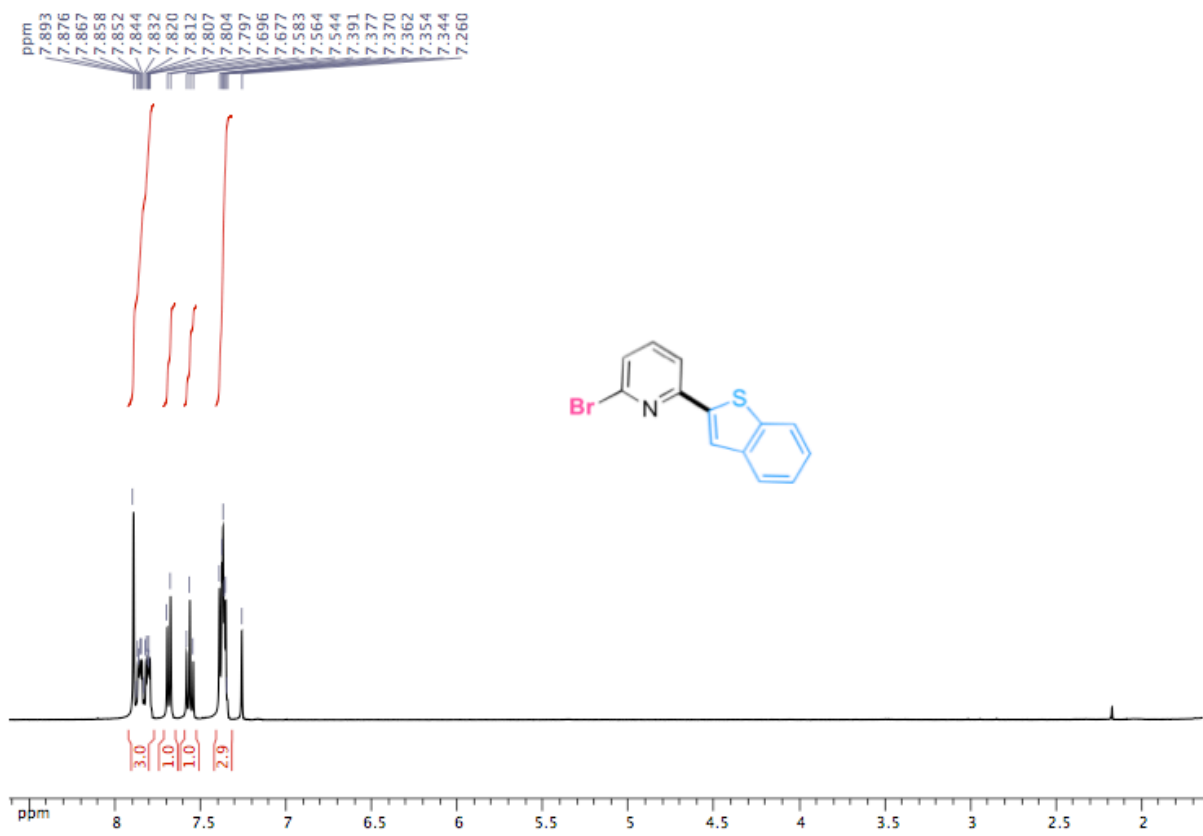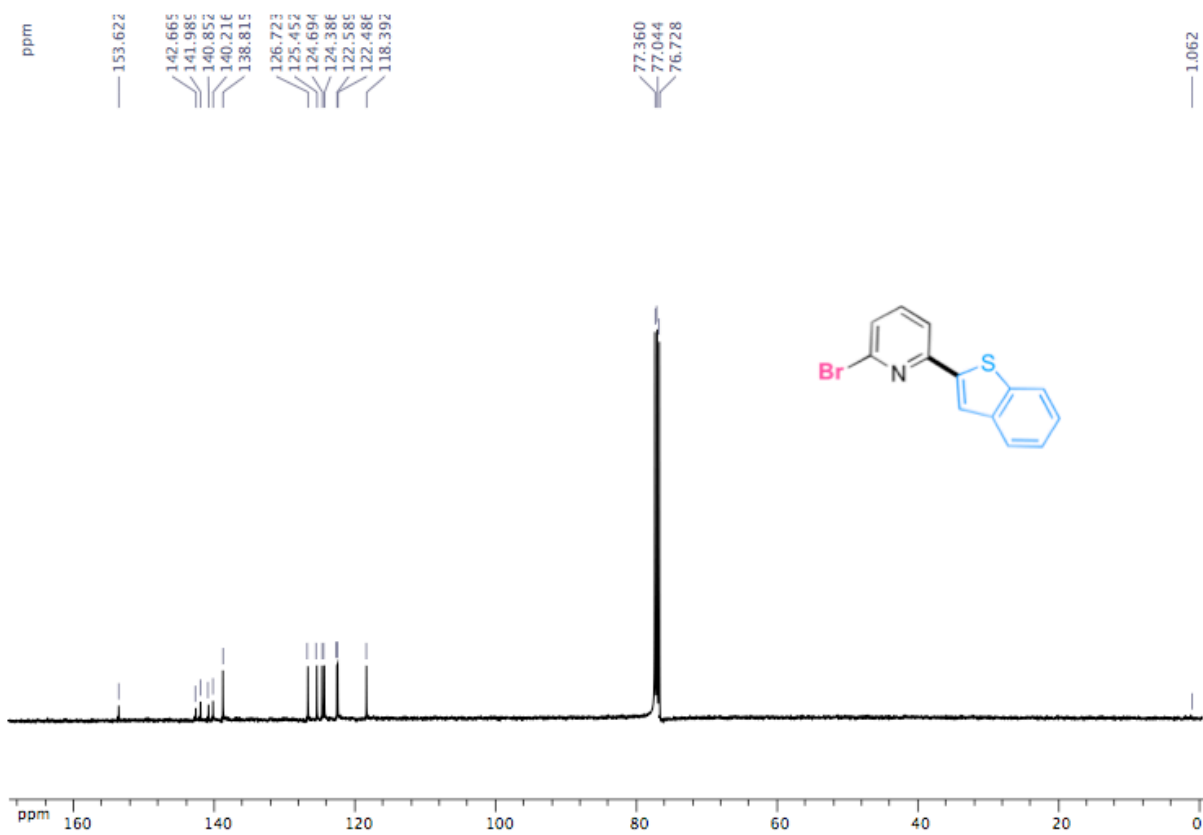

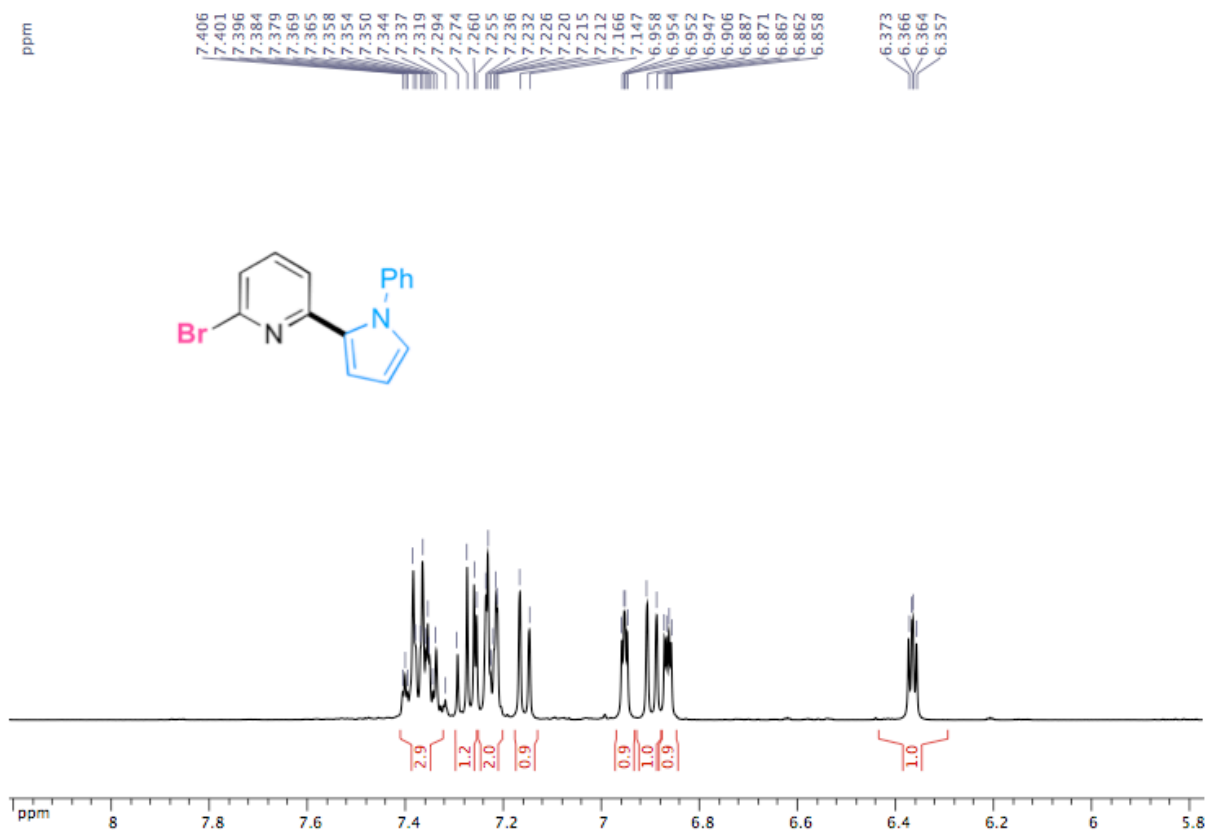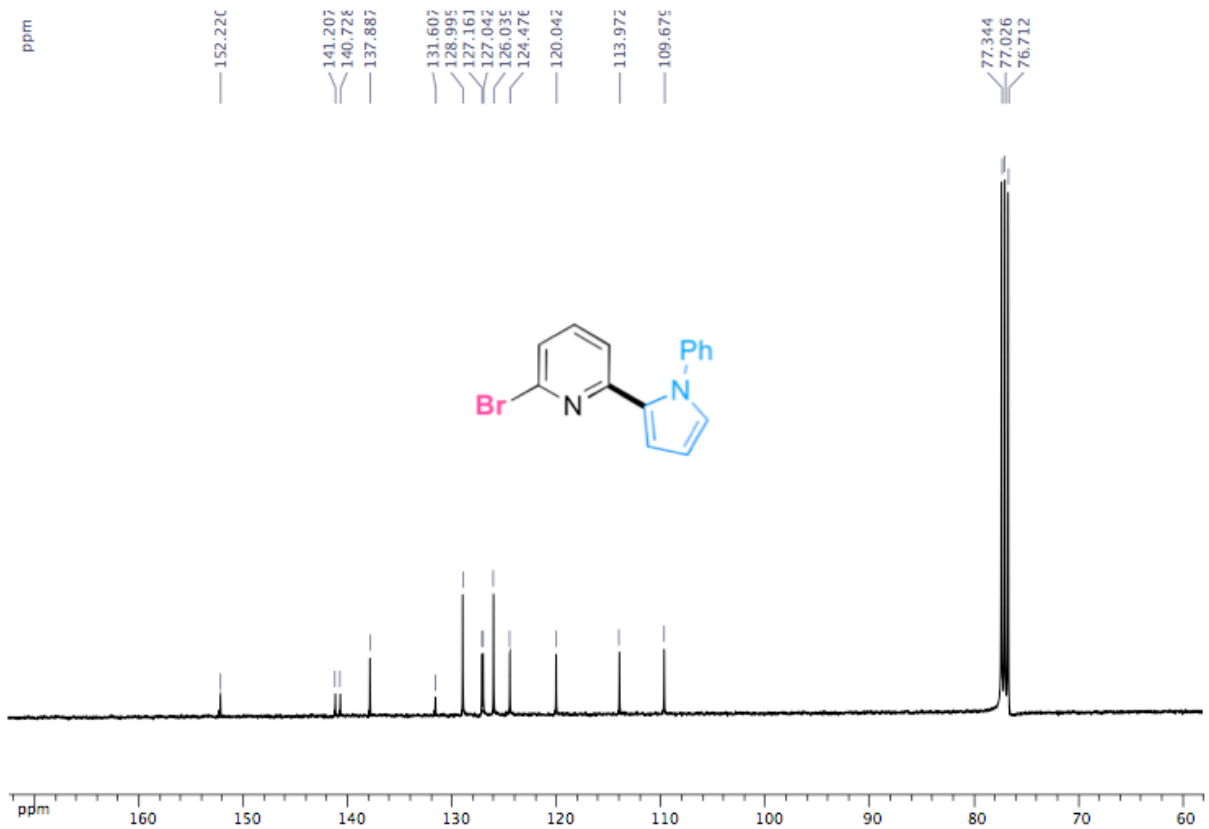

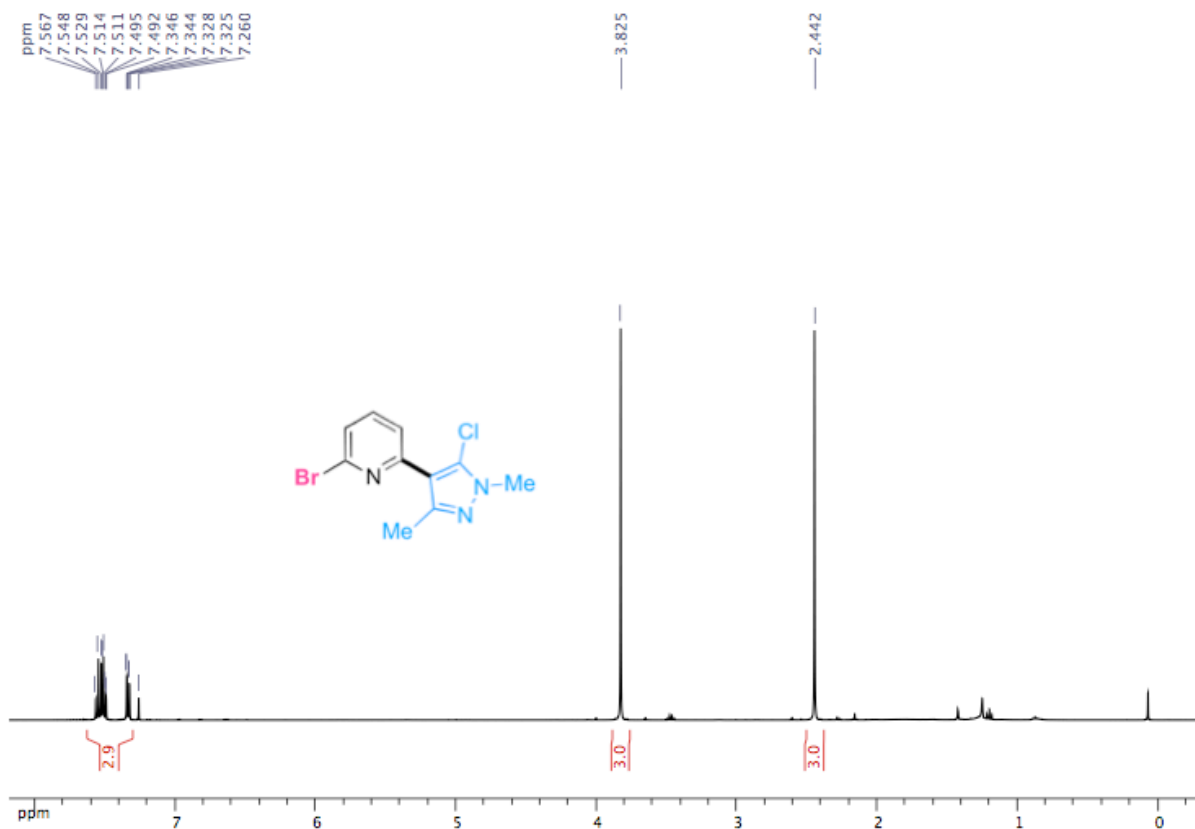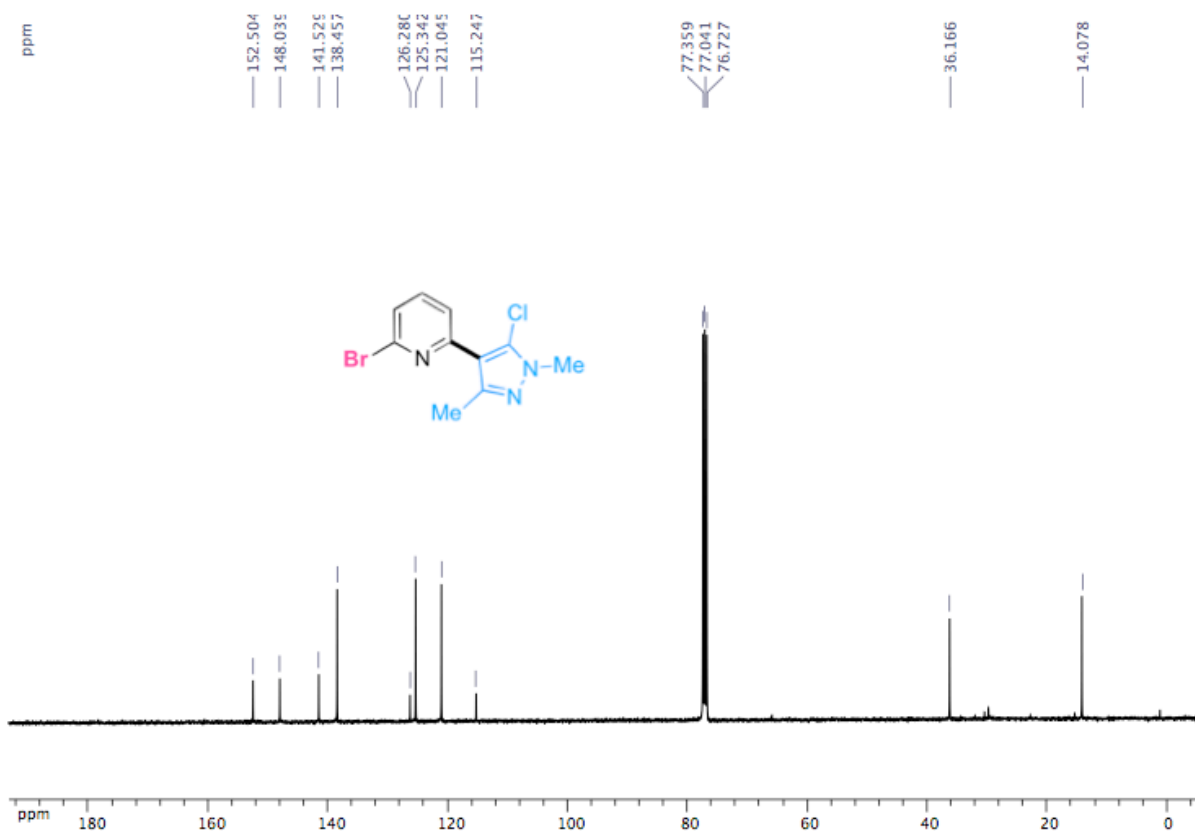

ppm

7.935  
7.916  
7.896  
7.751  
7.732  
7.687  
7.669

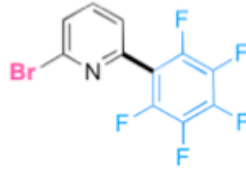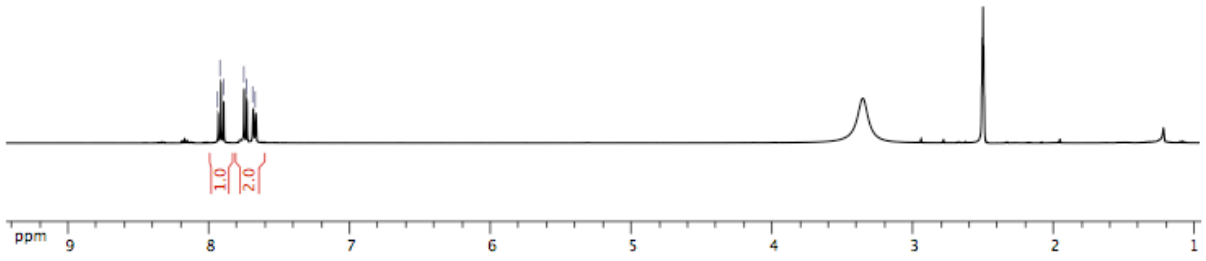

ppm

147.944  
145.313  
142.910  
140.982  
140.281  
139.205  
137.455

128.065  
125.545

107.463  
107.295  
107.130

40.138  
39.927  
39.721  
39.303  
39.093  
38.886

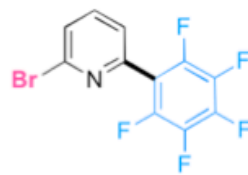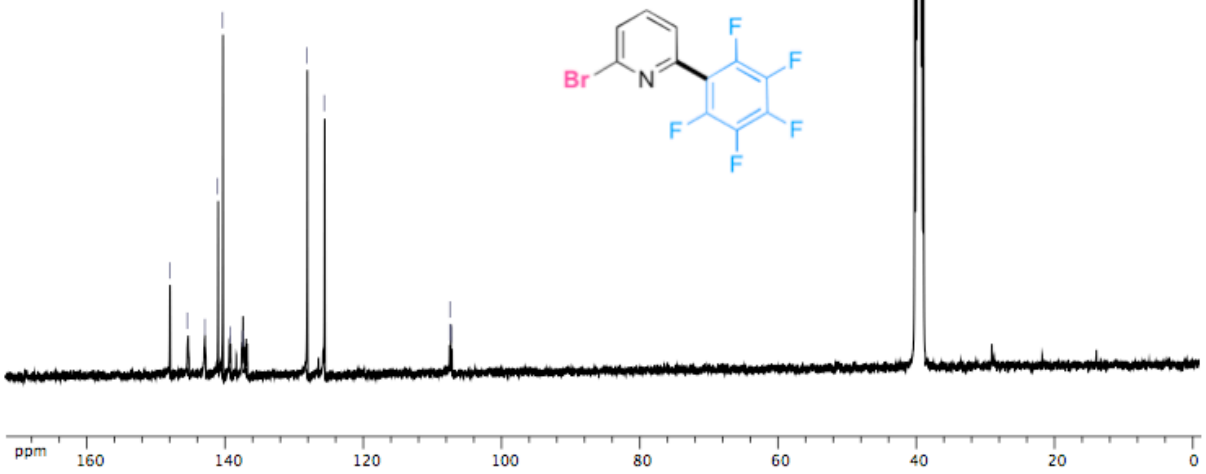

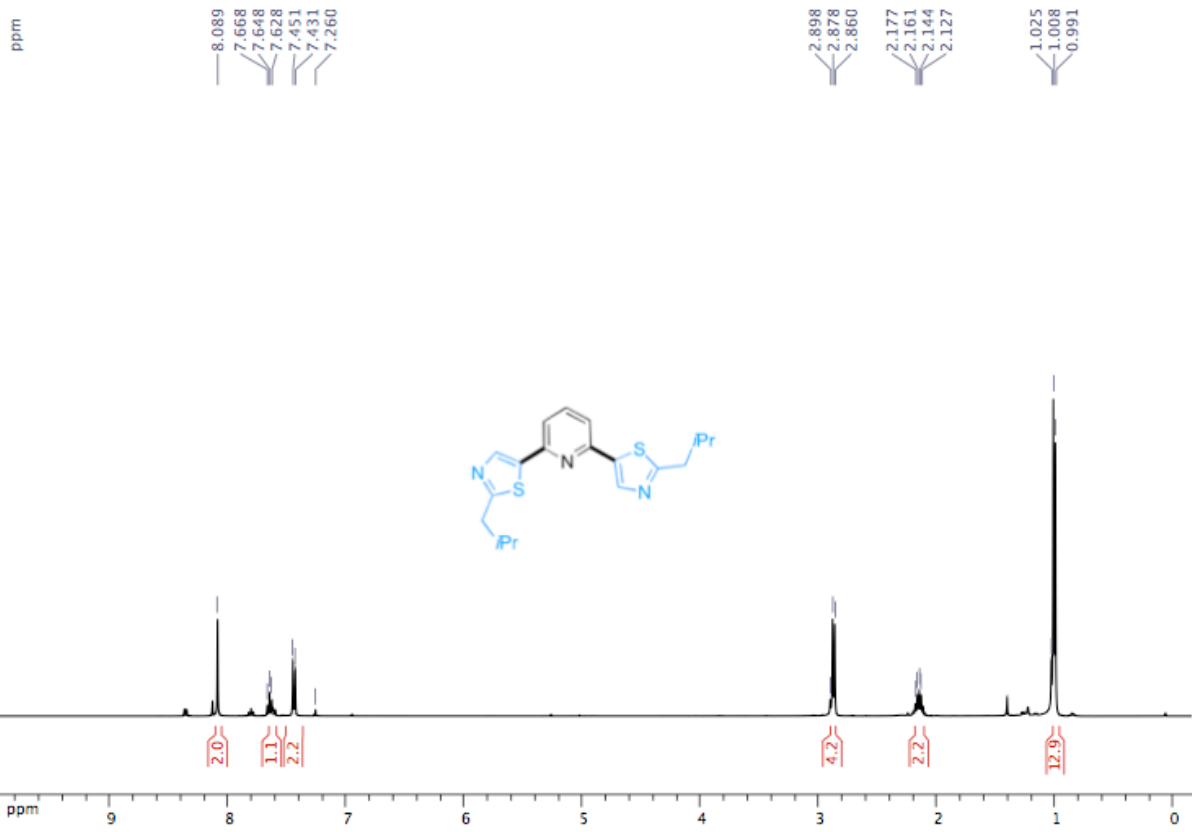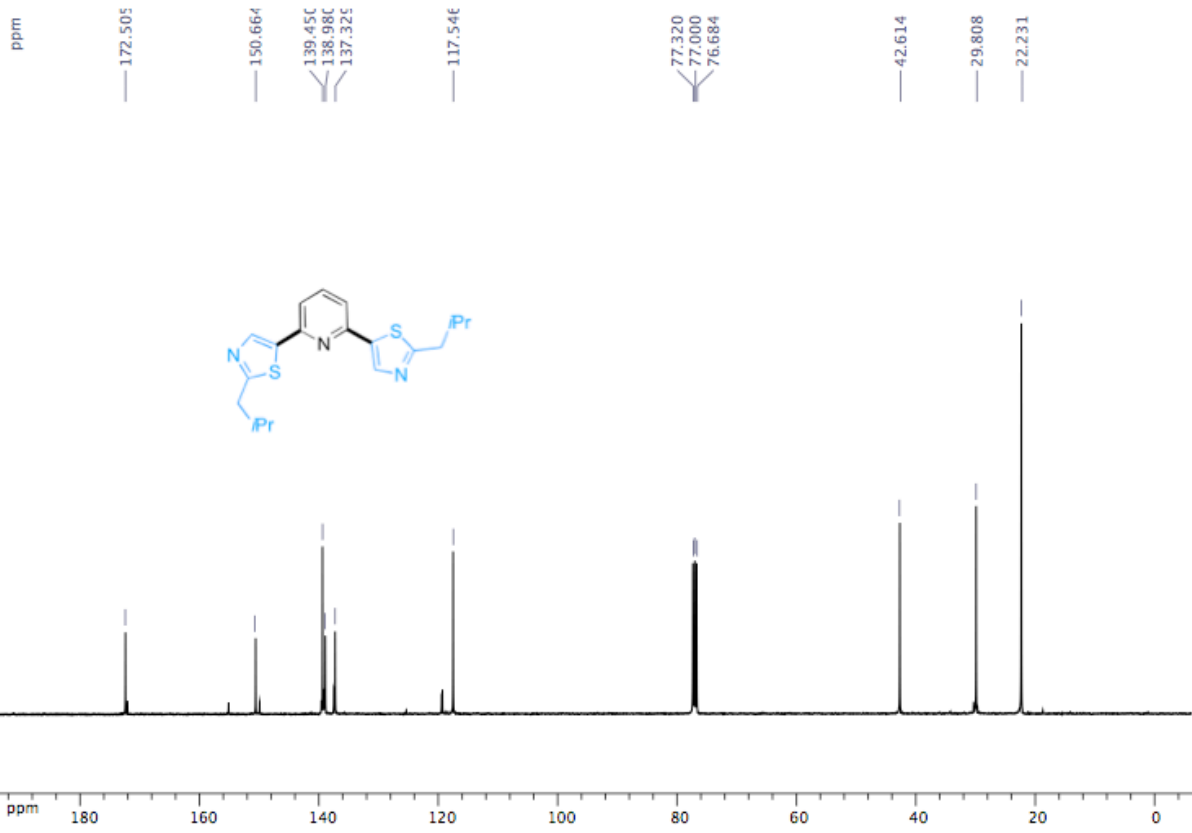



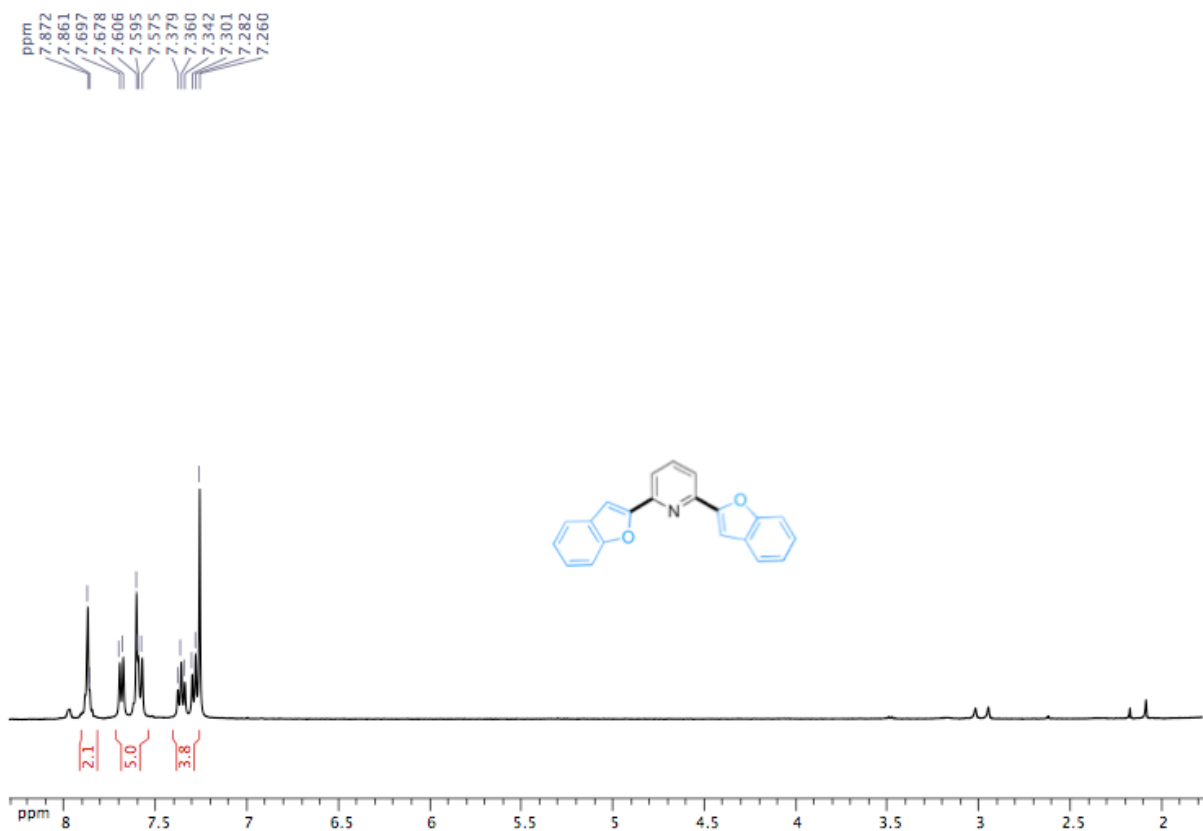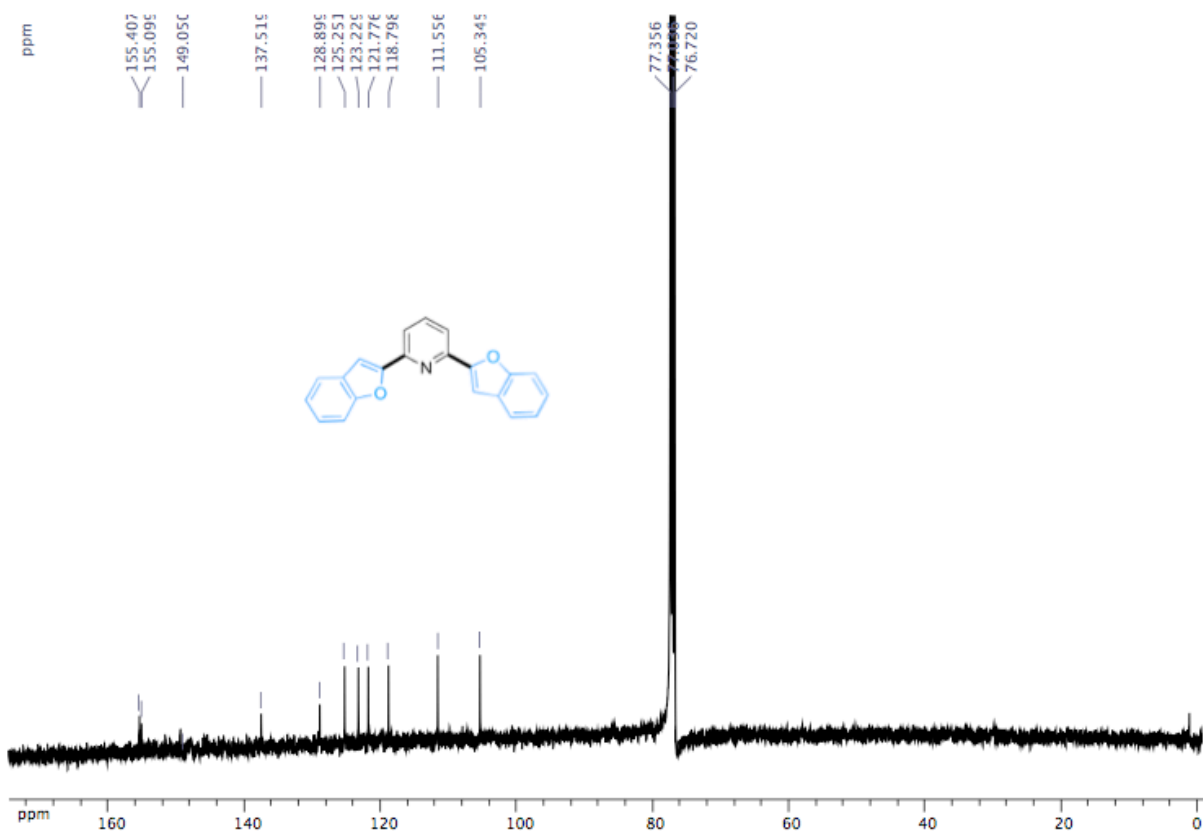

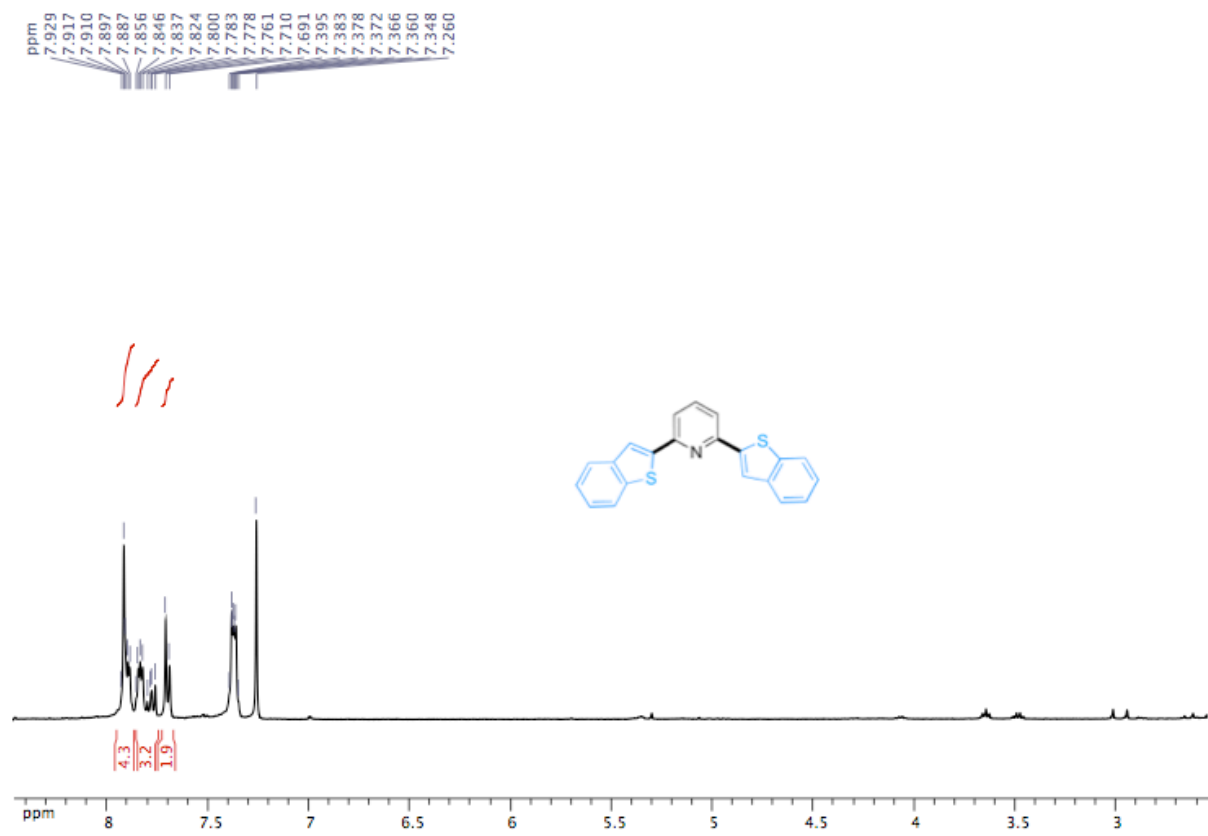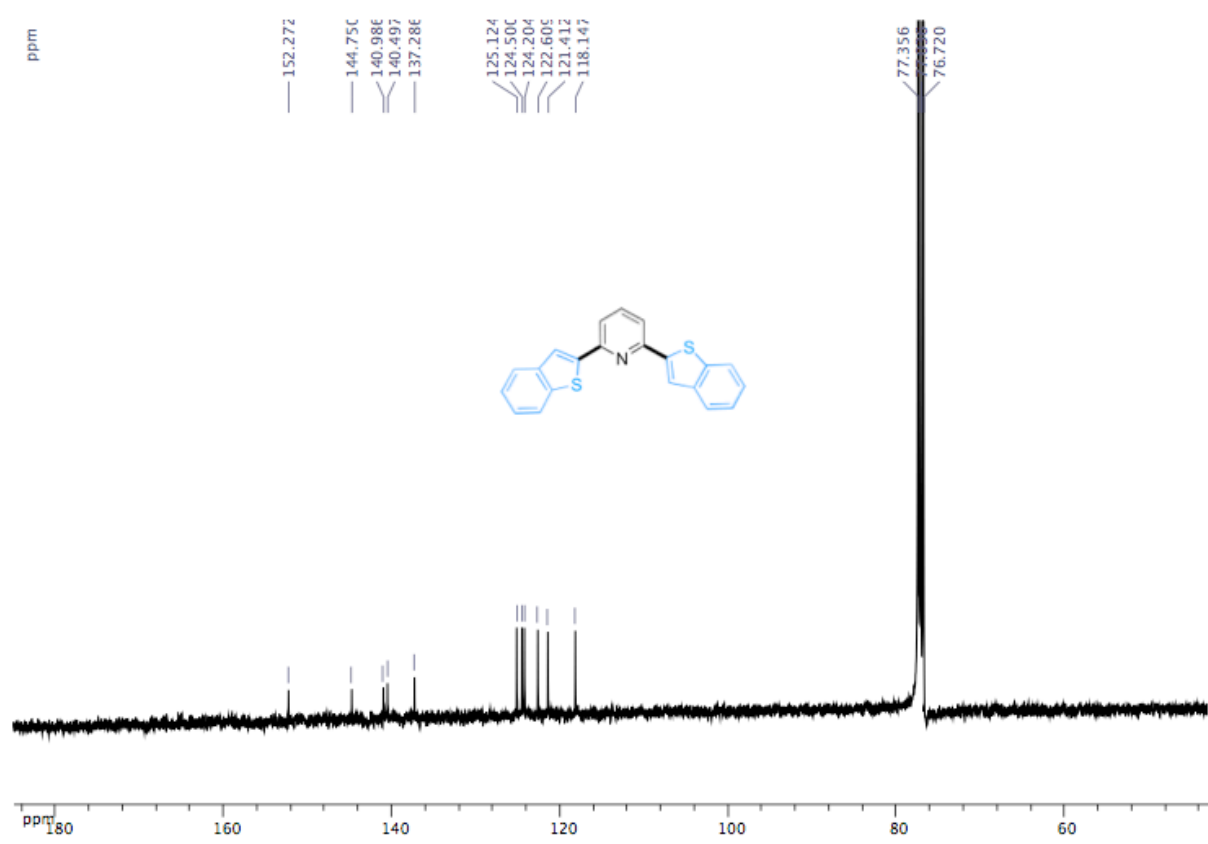

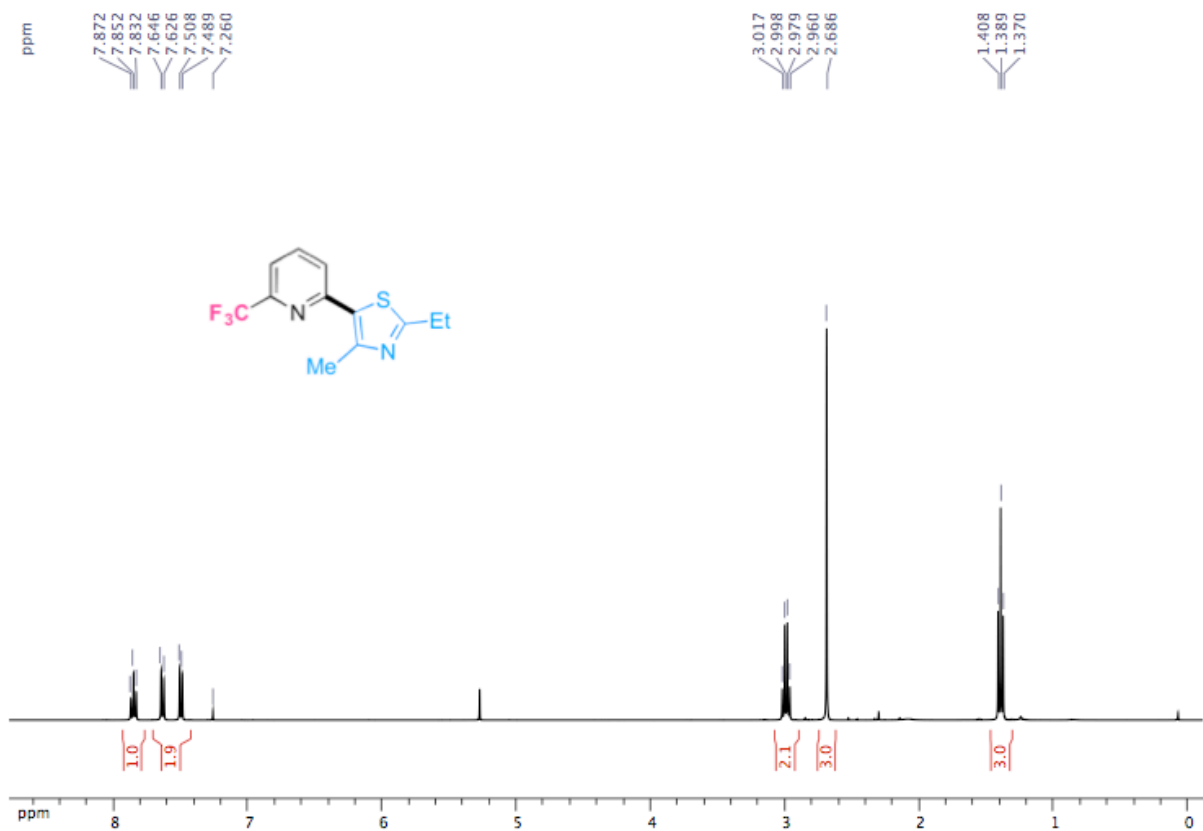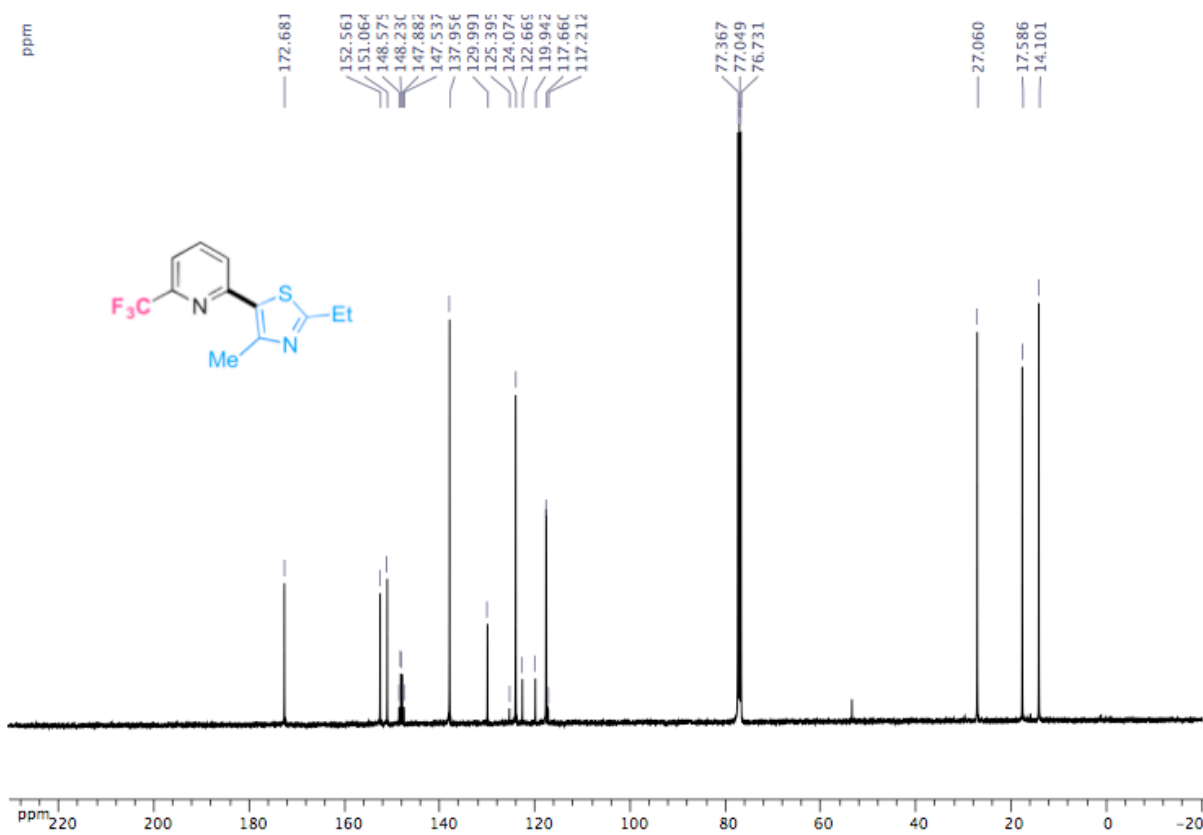

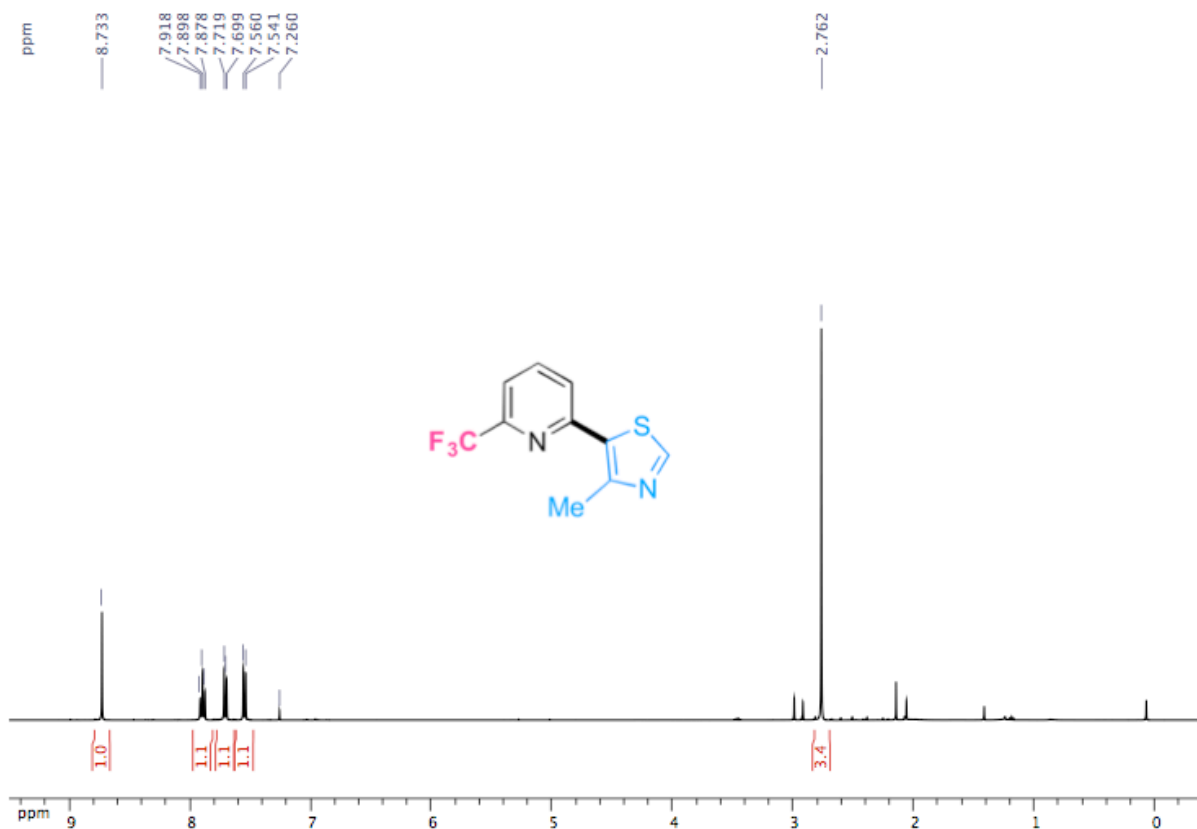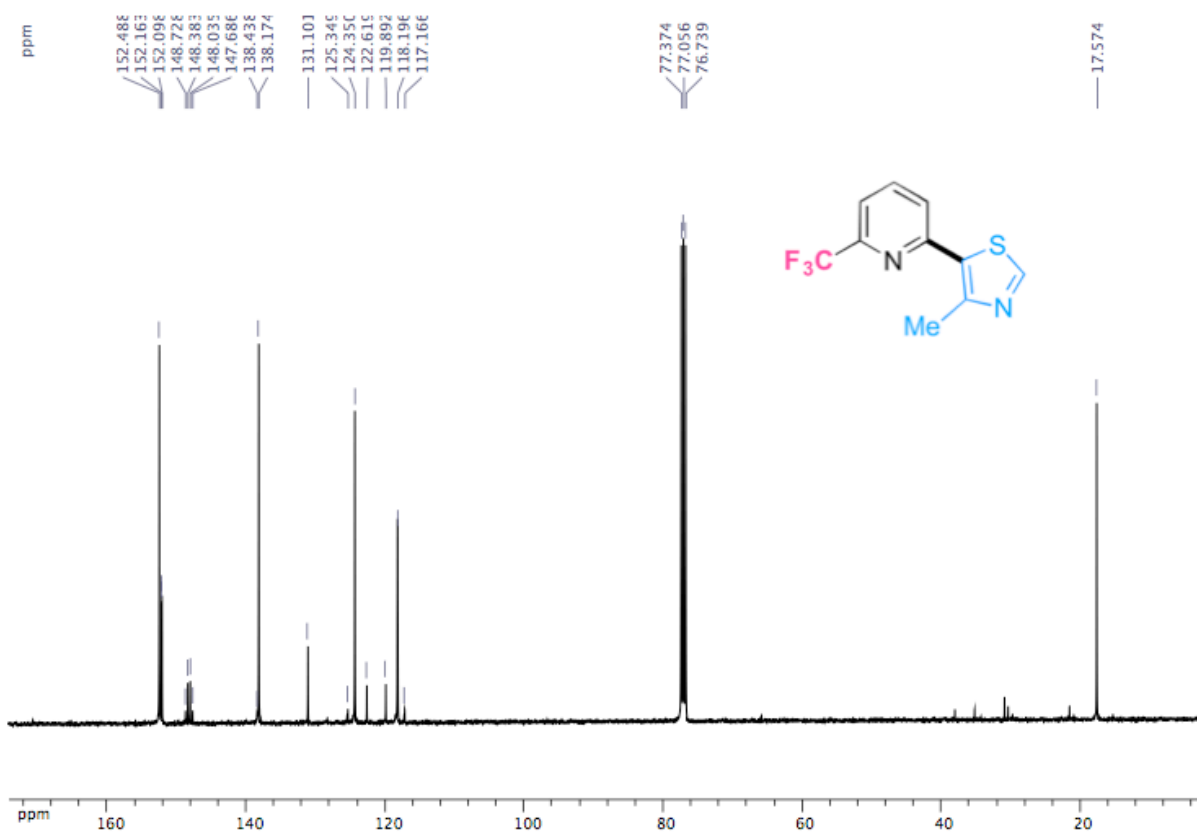

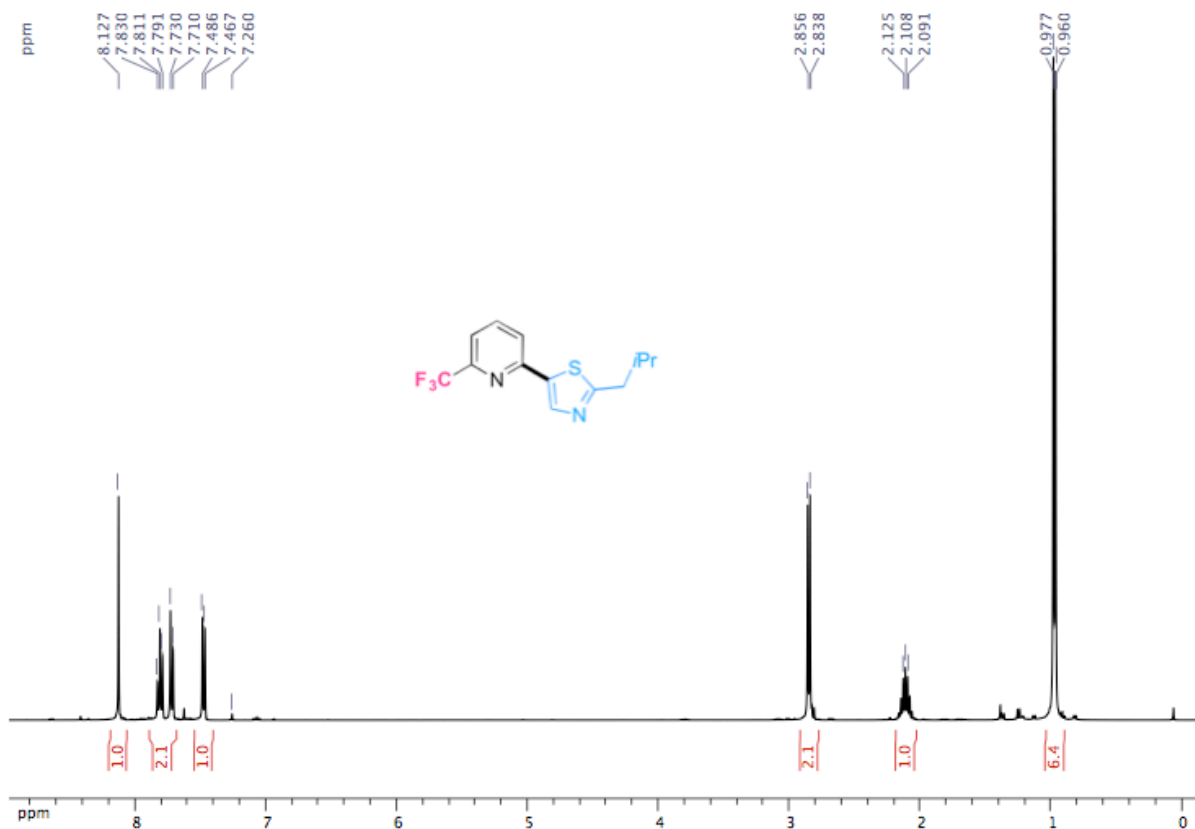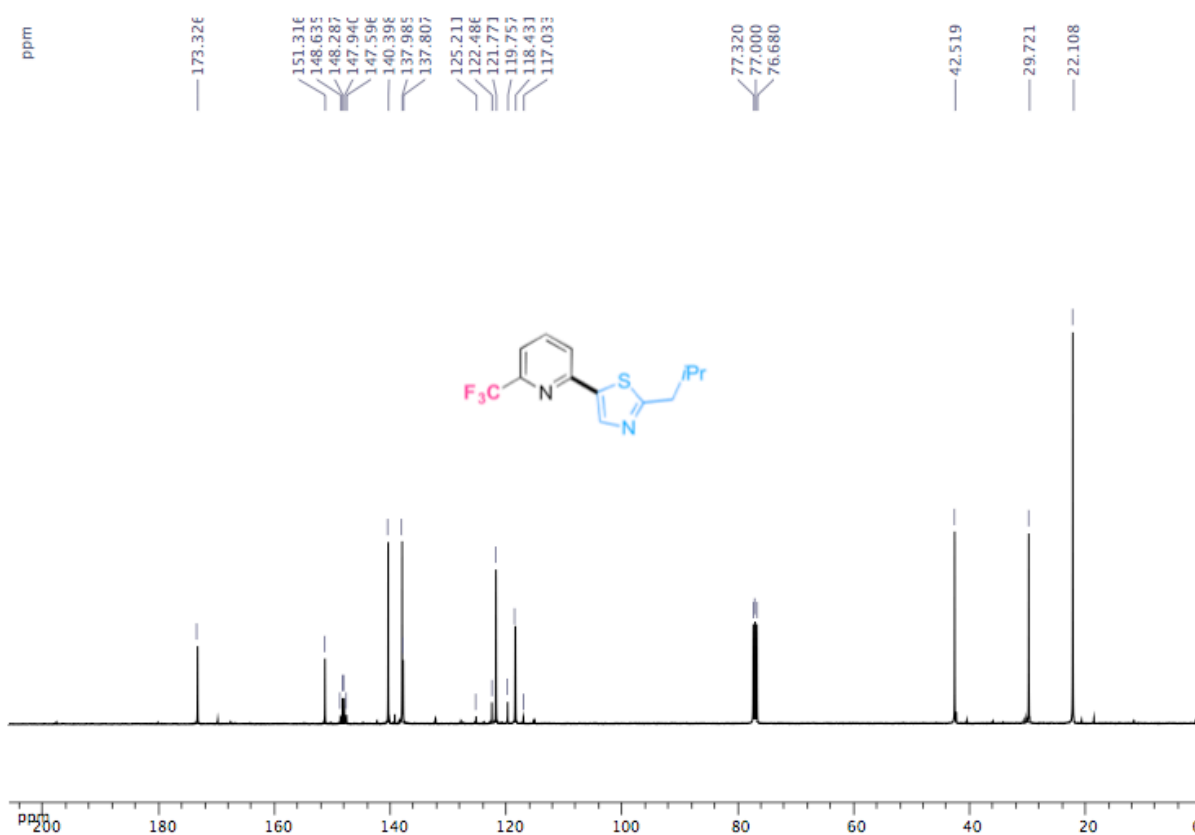

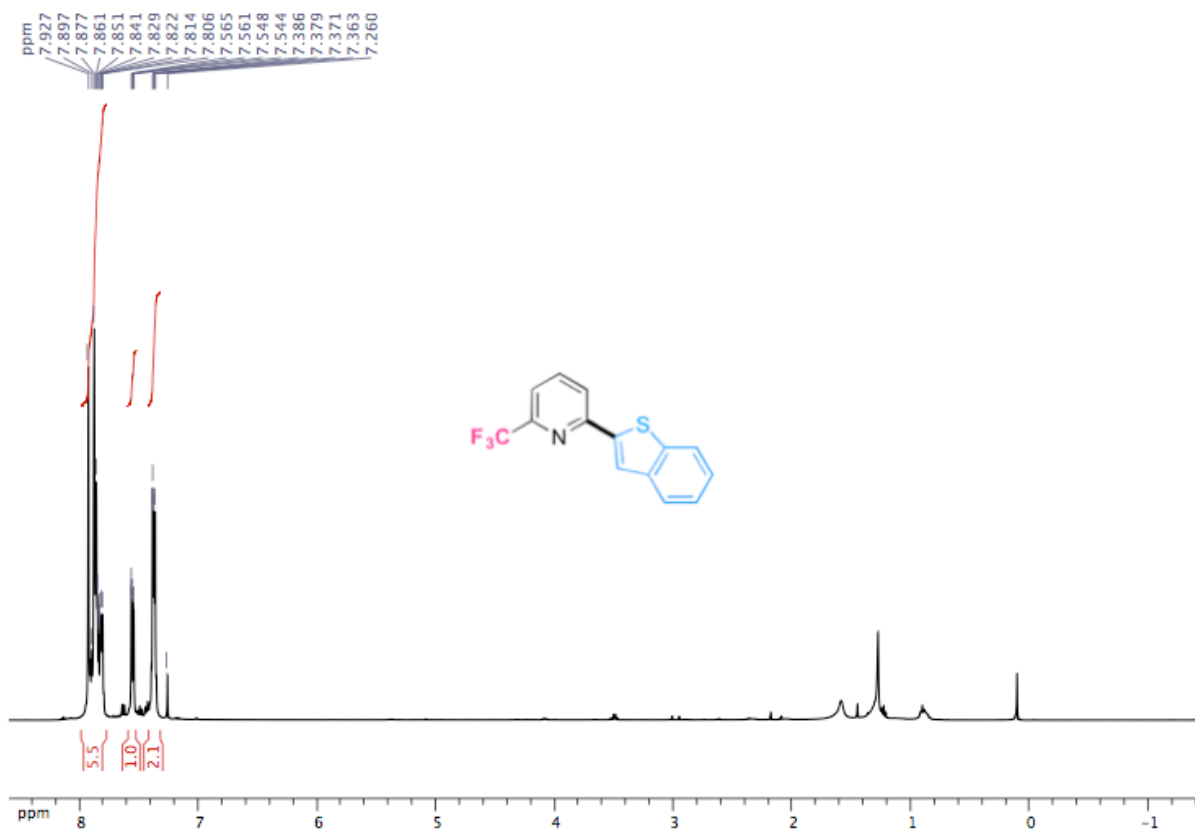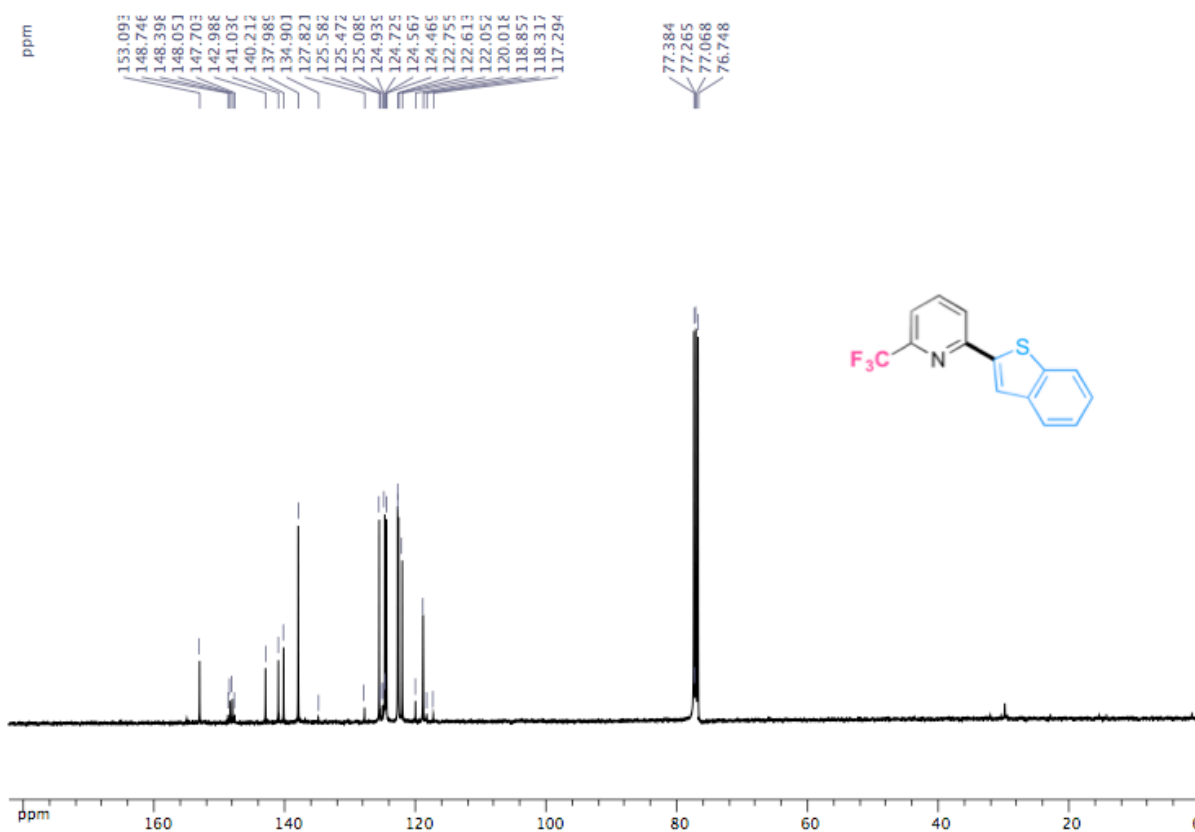

ppm  
 8.096  
 8.076  
 7.988  
 7.968  
 7.948  
 7.703  
 7.684  
 7.631  
 7.610  
 7.600  
 7.580  
 7.415  
 7.396  
 7.377  
 7.325  
 7.306  
 7.286

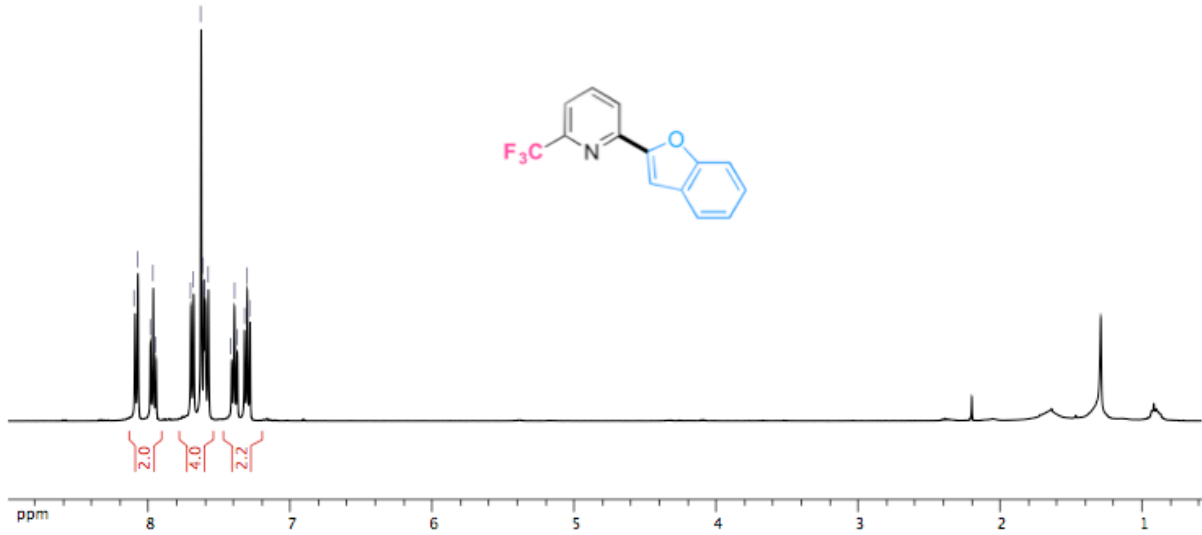

ppm  
 155.514  
 153.840  
 149.761  
 149.022  
 148.675  
 148.327  
 147.984  
 138.181  
 128.674  
 125.740  
 125.491  
 123.440  
 122.761  
 122.060  
 121.843  
 120.034  
 119.075  
 117.306  
 111.584  
 106.672

ppm  
 77.360  
 77.044  
 76.724

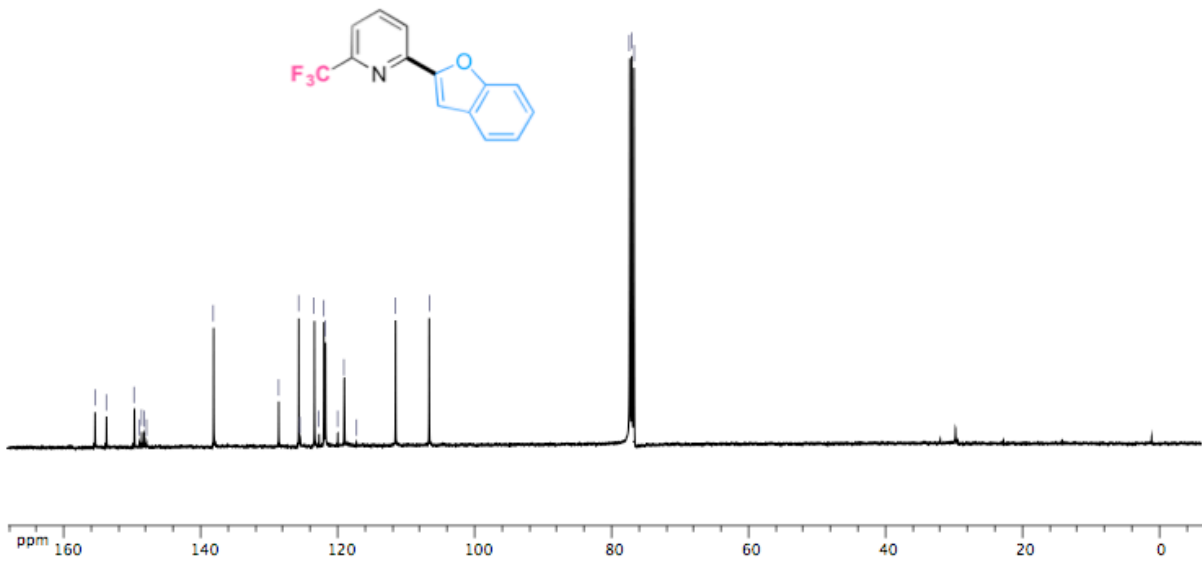



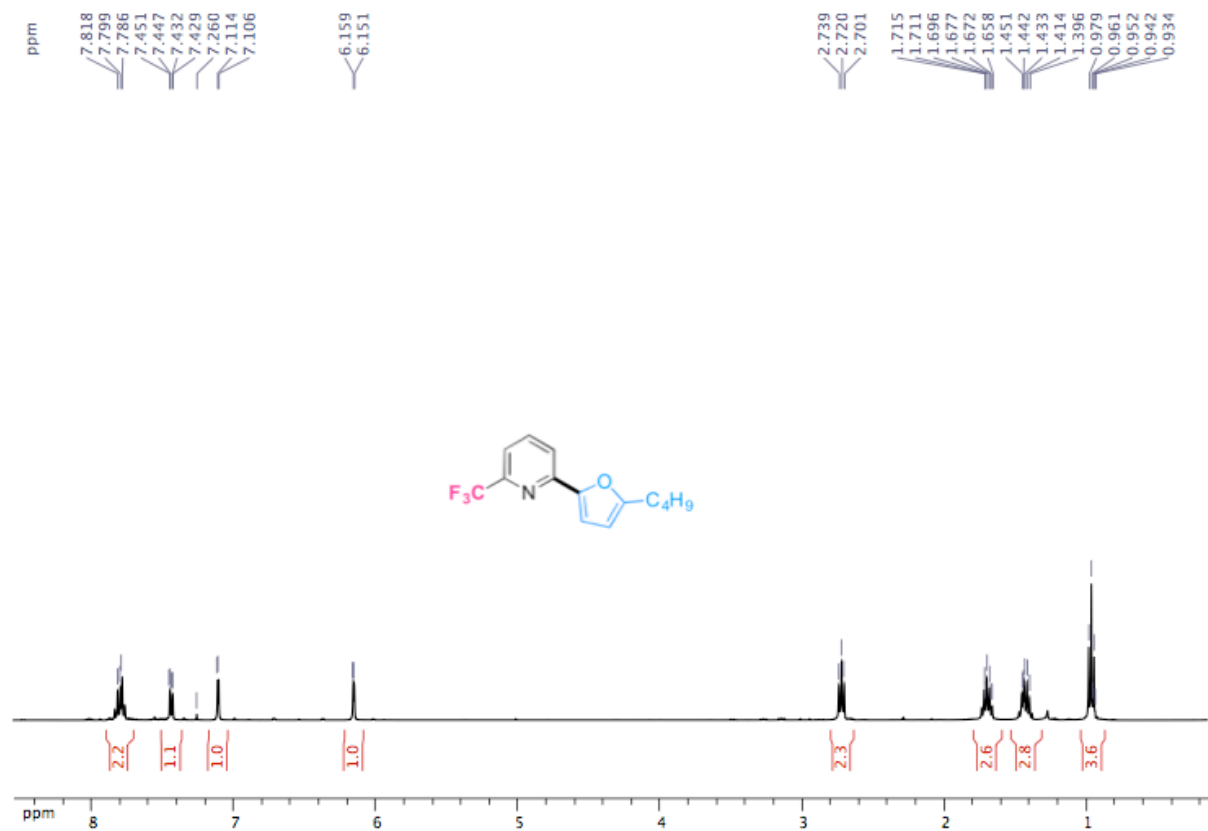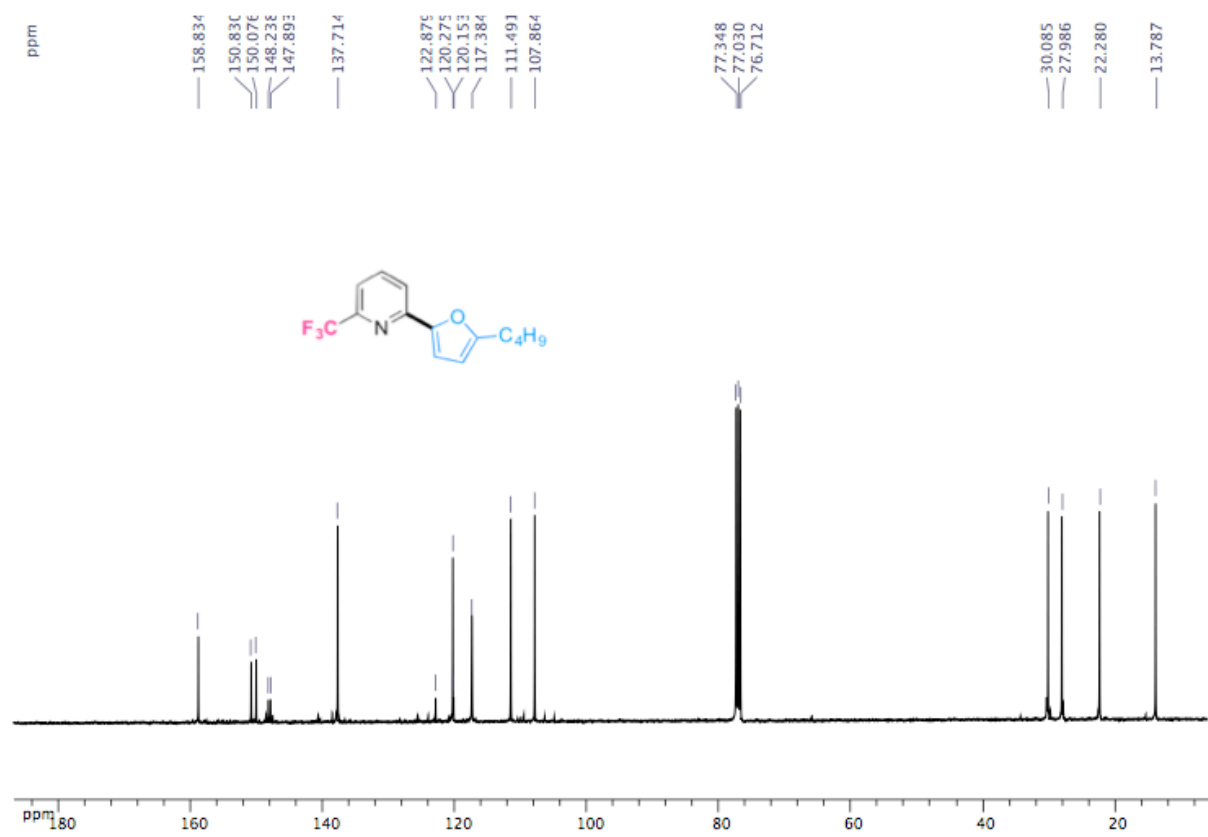

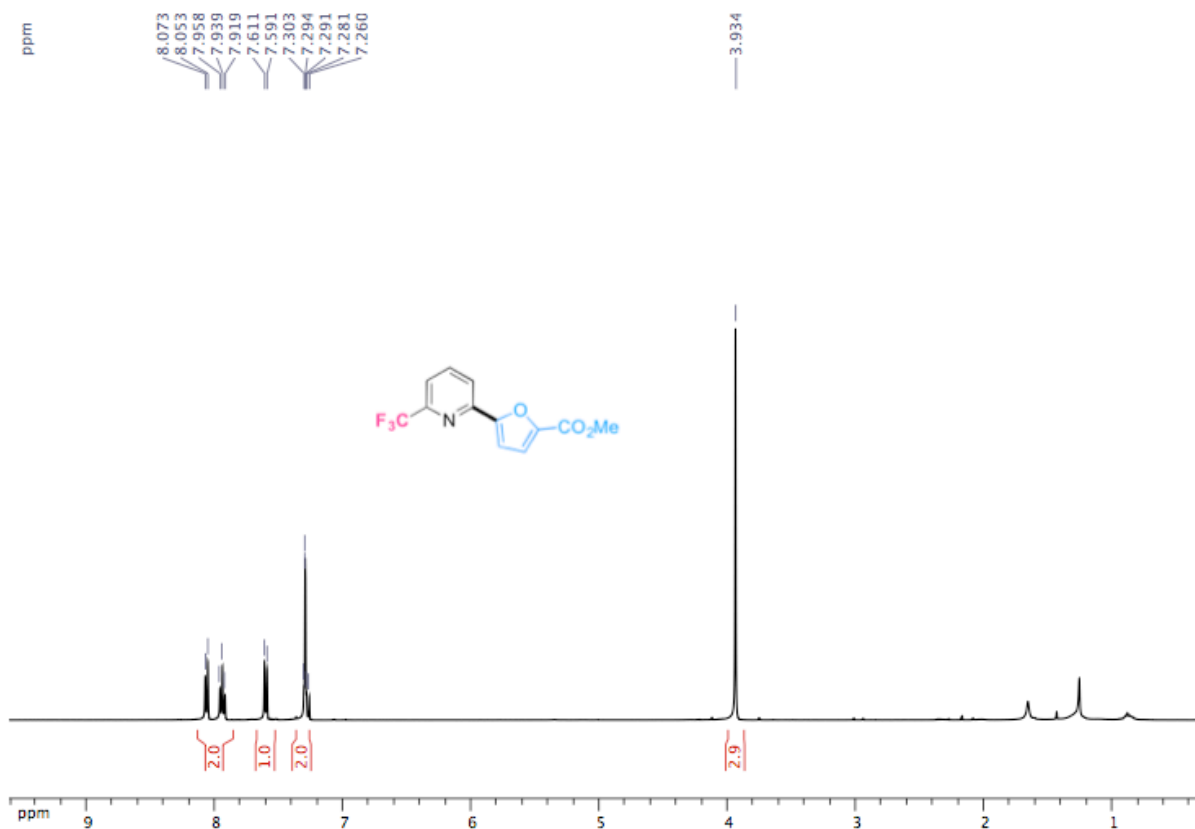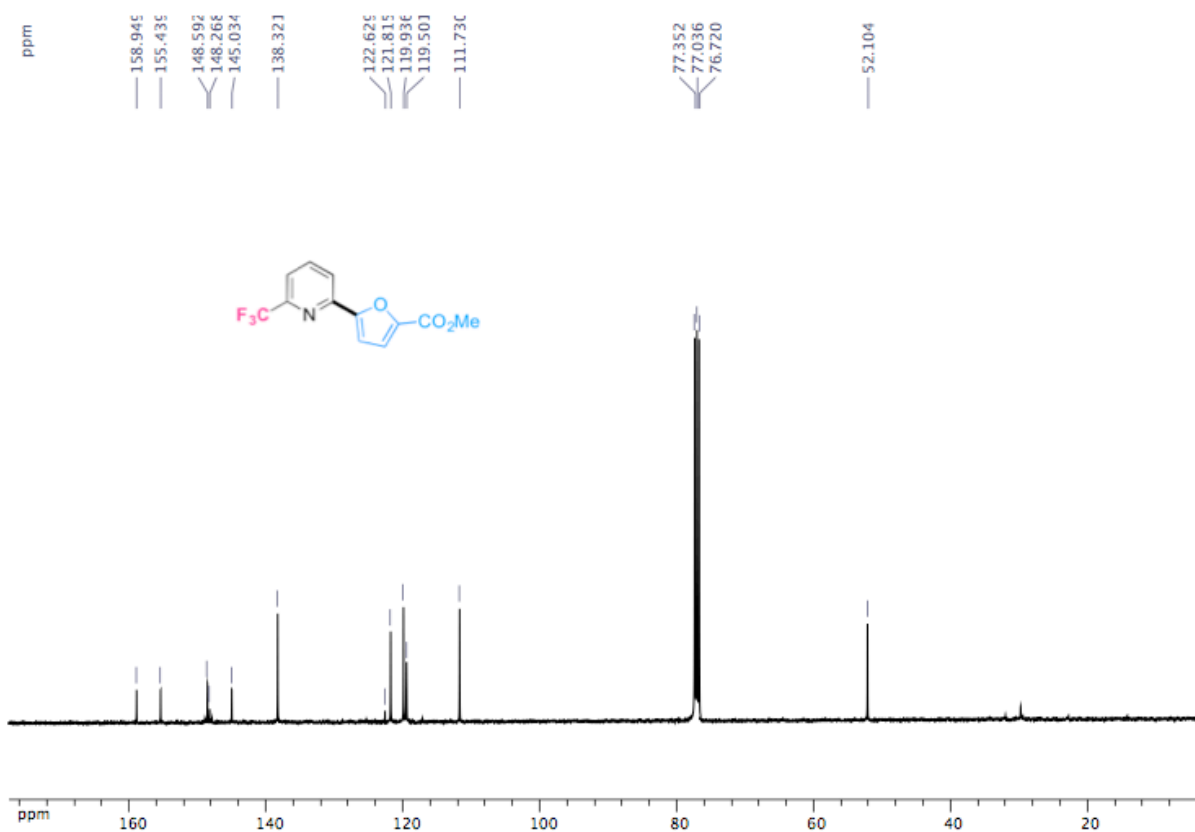

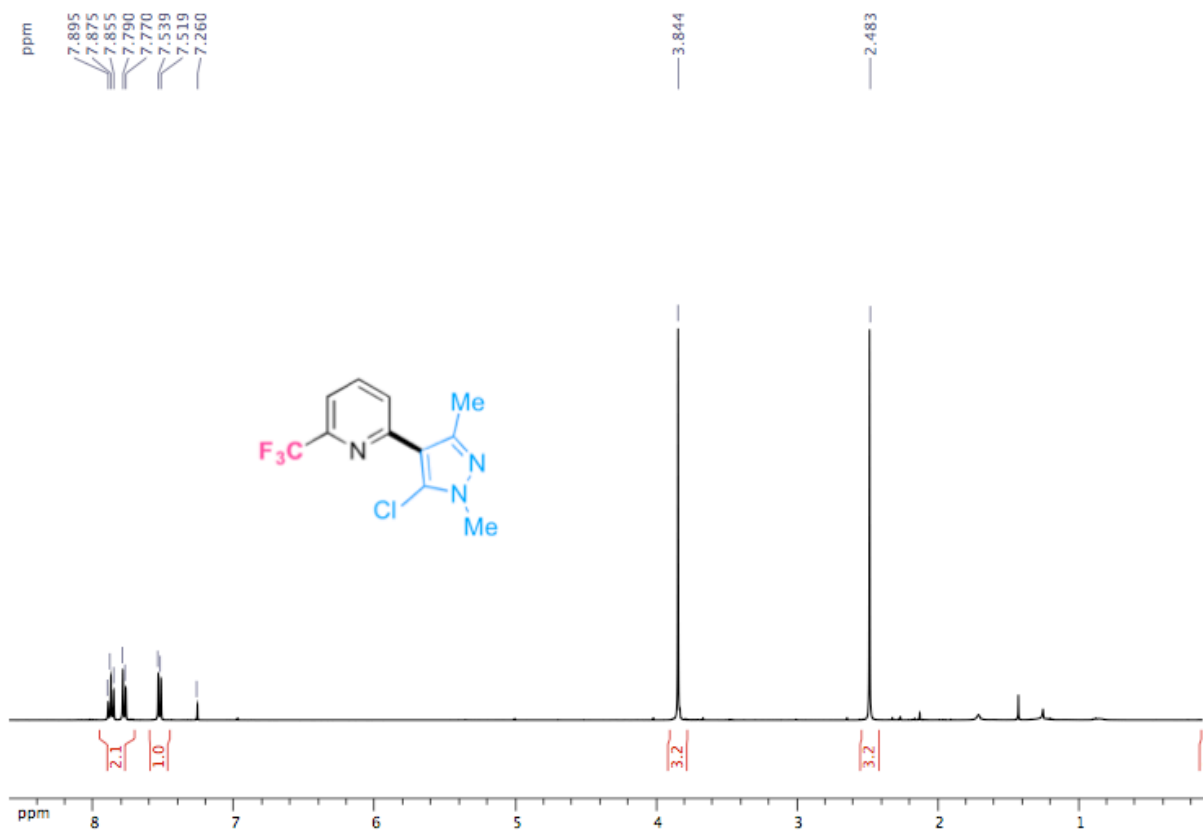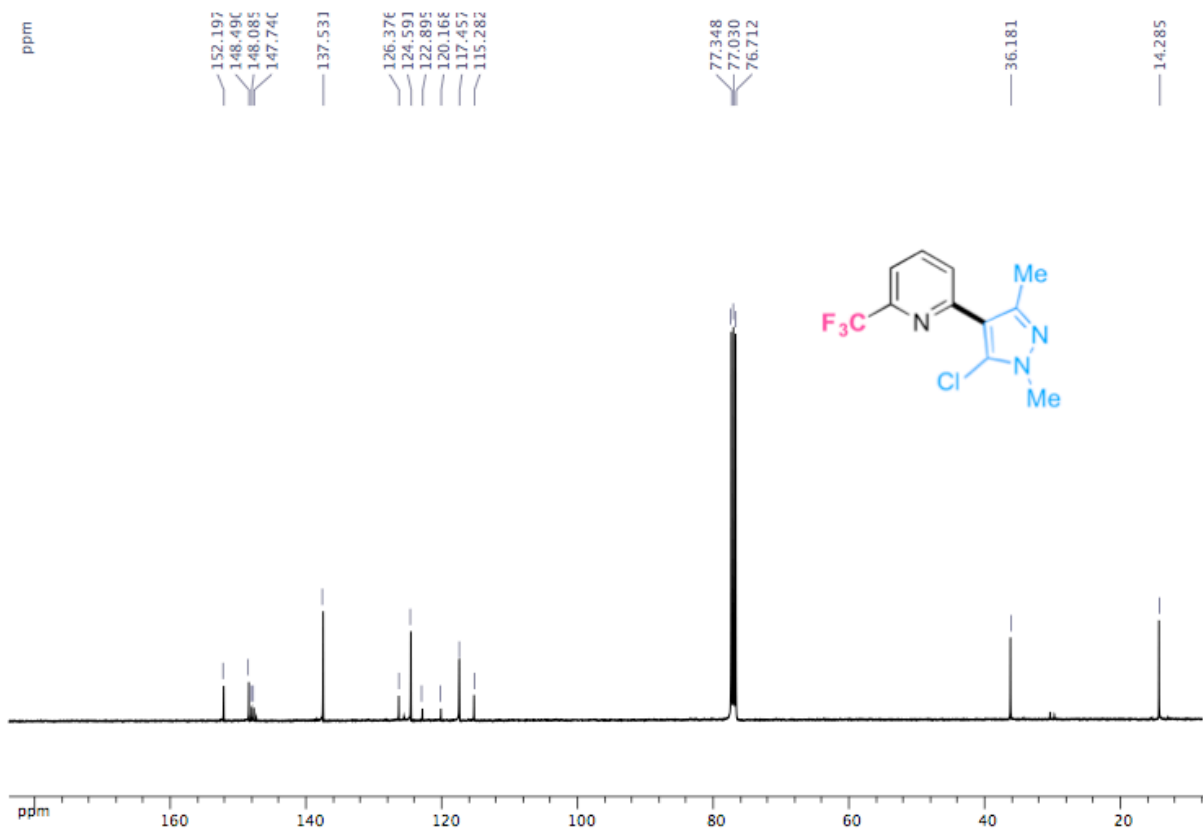

ppm  
 8.343  
 8.323  
 8.304  
 8.286  
 8.196  
 8.188  
 8.177  
 8.173  
 7.955  
 7.628  
 7.608  
 7.534  
 7.523  
 7.510  
 7.506  
 7.497  
 7.479  
 7.460  
 7.446  
 7.429  
 7.260

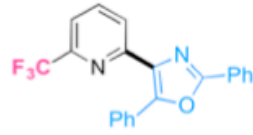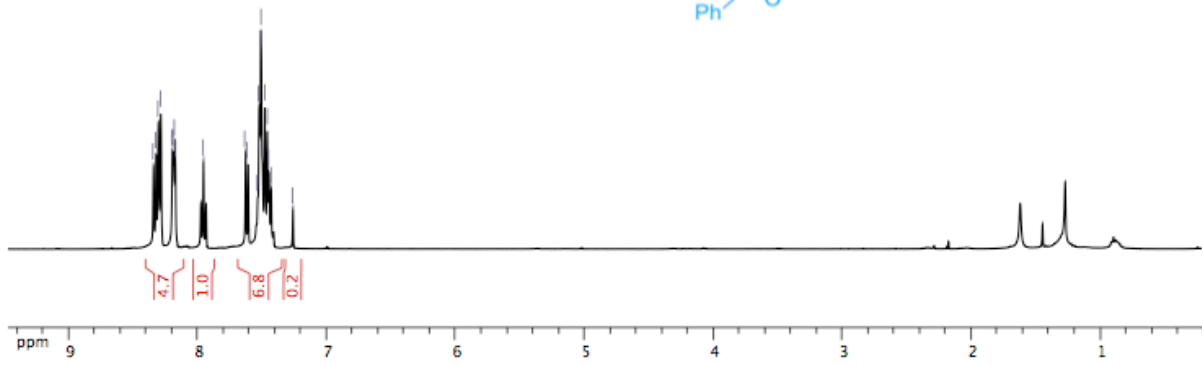

ppm  
 159.803  
 152.481  
 149.647  
 147.422  
 147.074  
 137.914  
 134.904  
 130.684  
 129.397  
 128.880  
 128.355  
 128.283  
 128.076  
 127.053  
 126.582  
 125.265  
 122.990  
 120.260  
 118.946  
 117.533  
 77.359  
 77.041  
 76.723

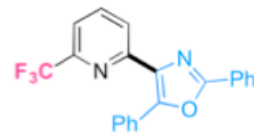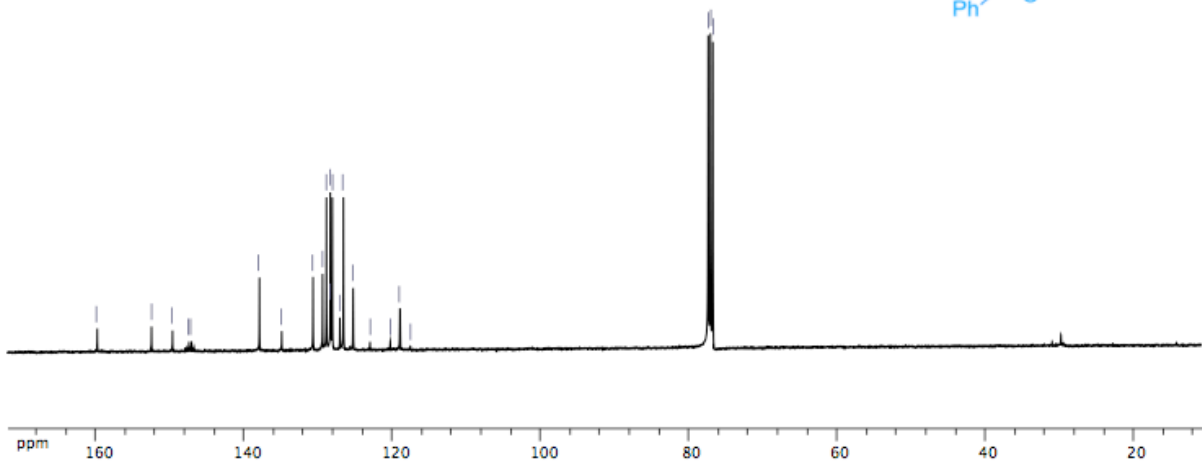

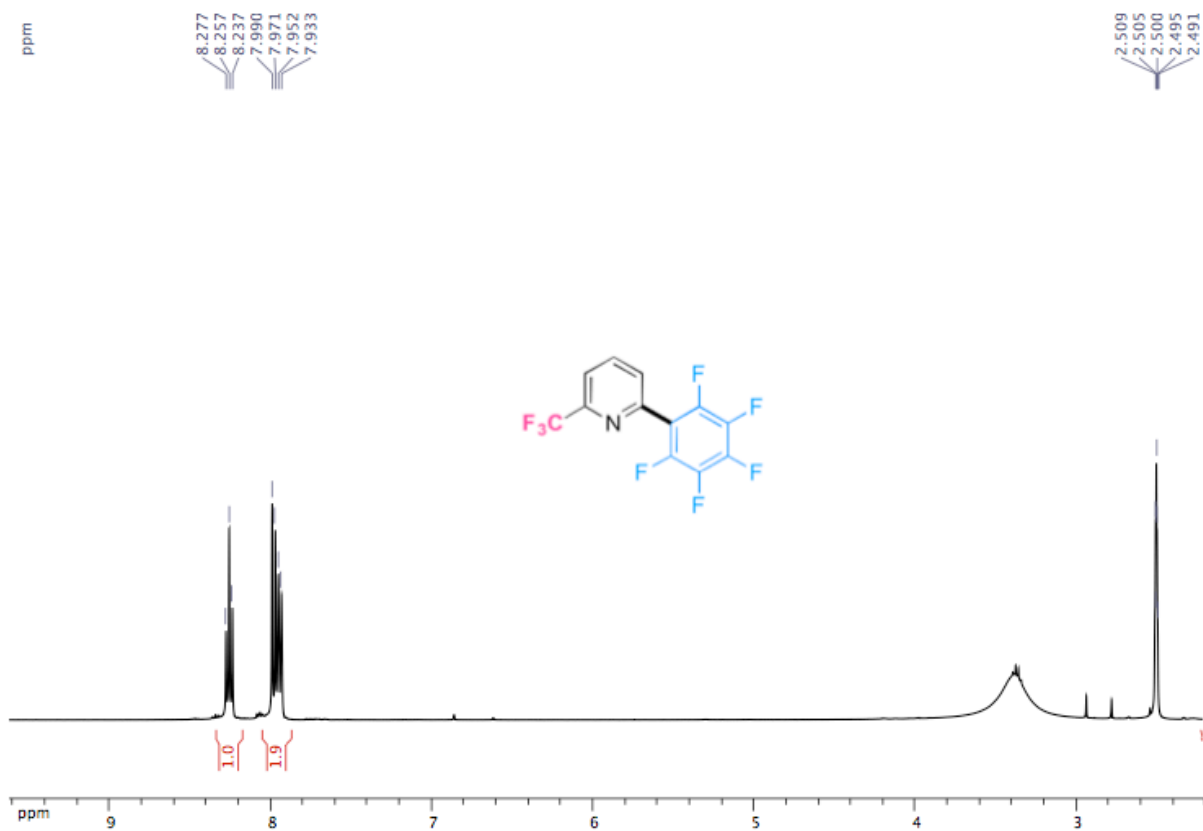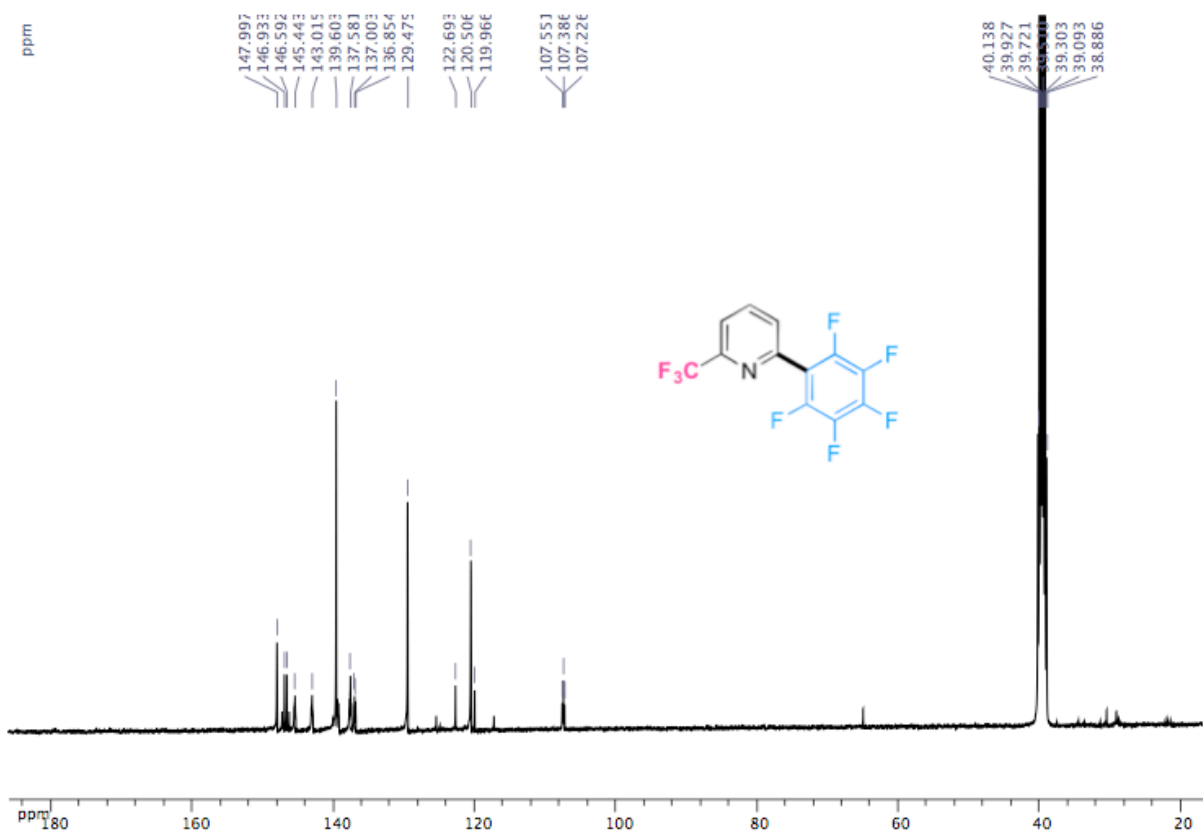

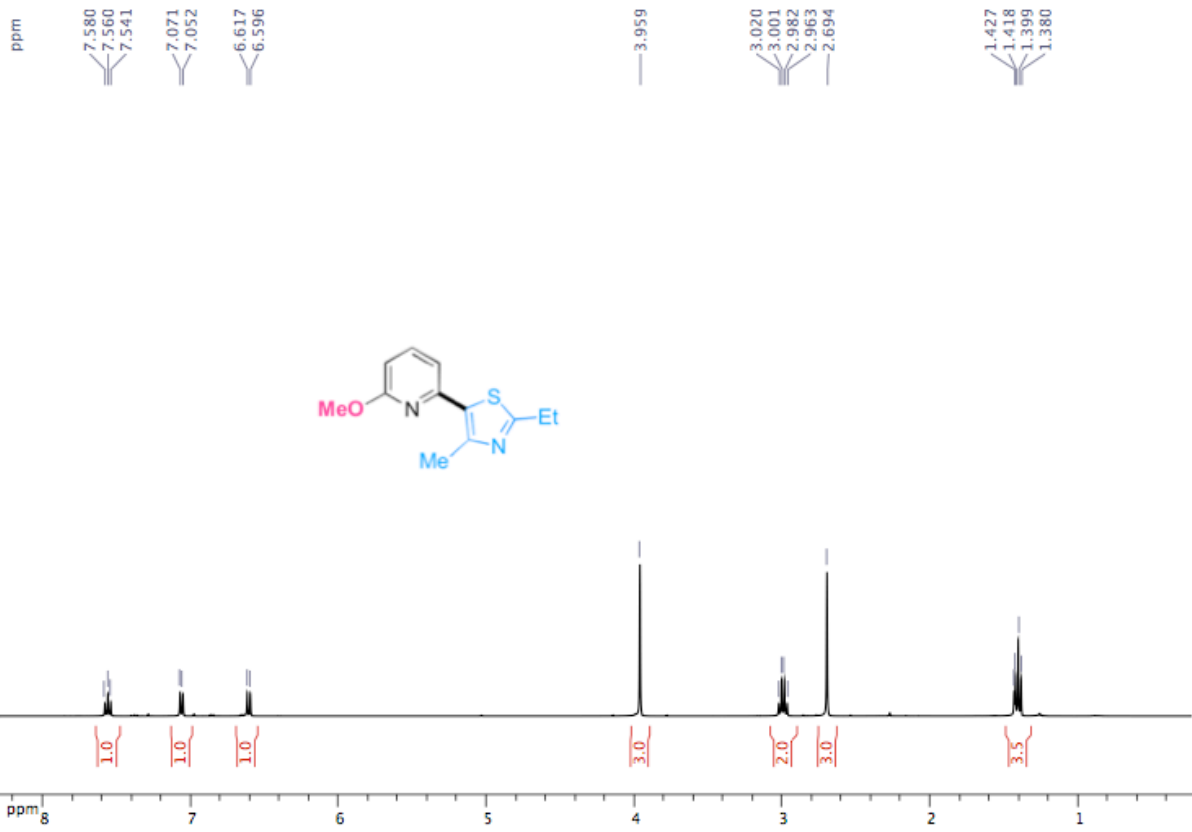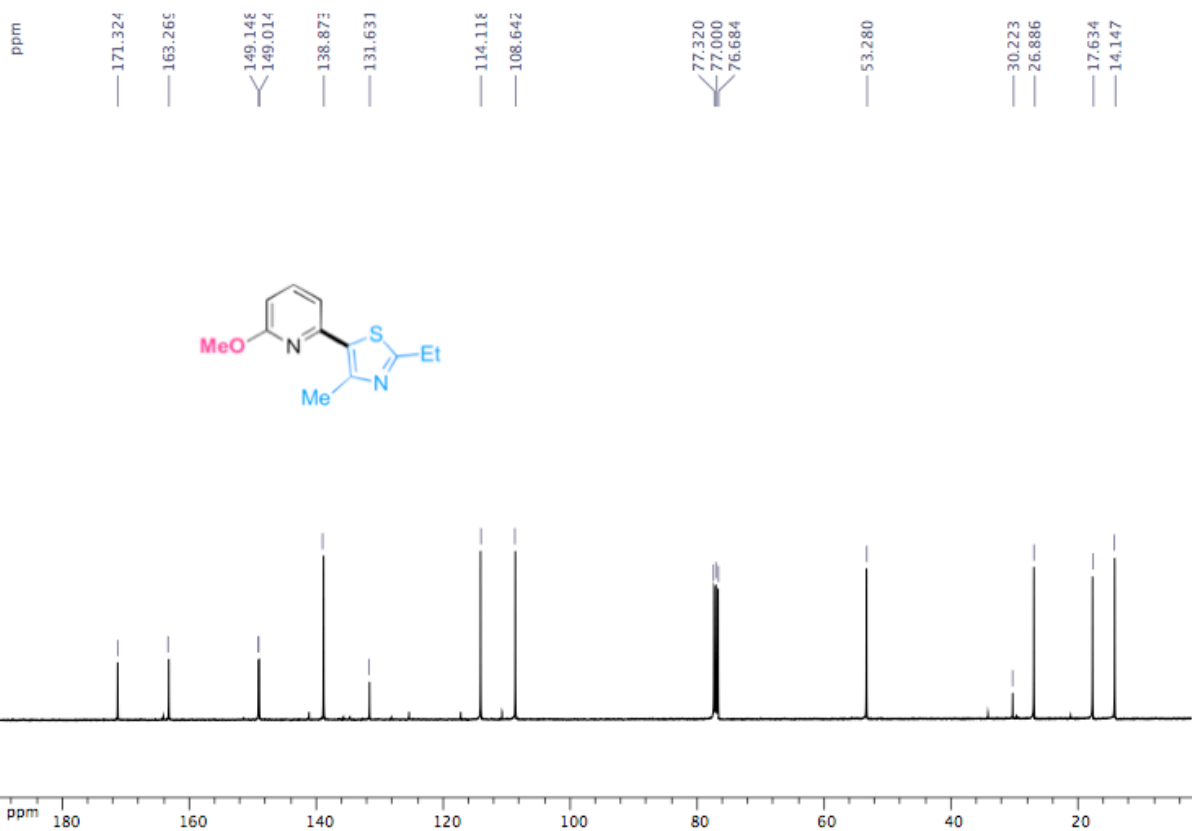

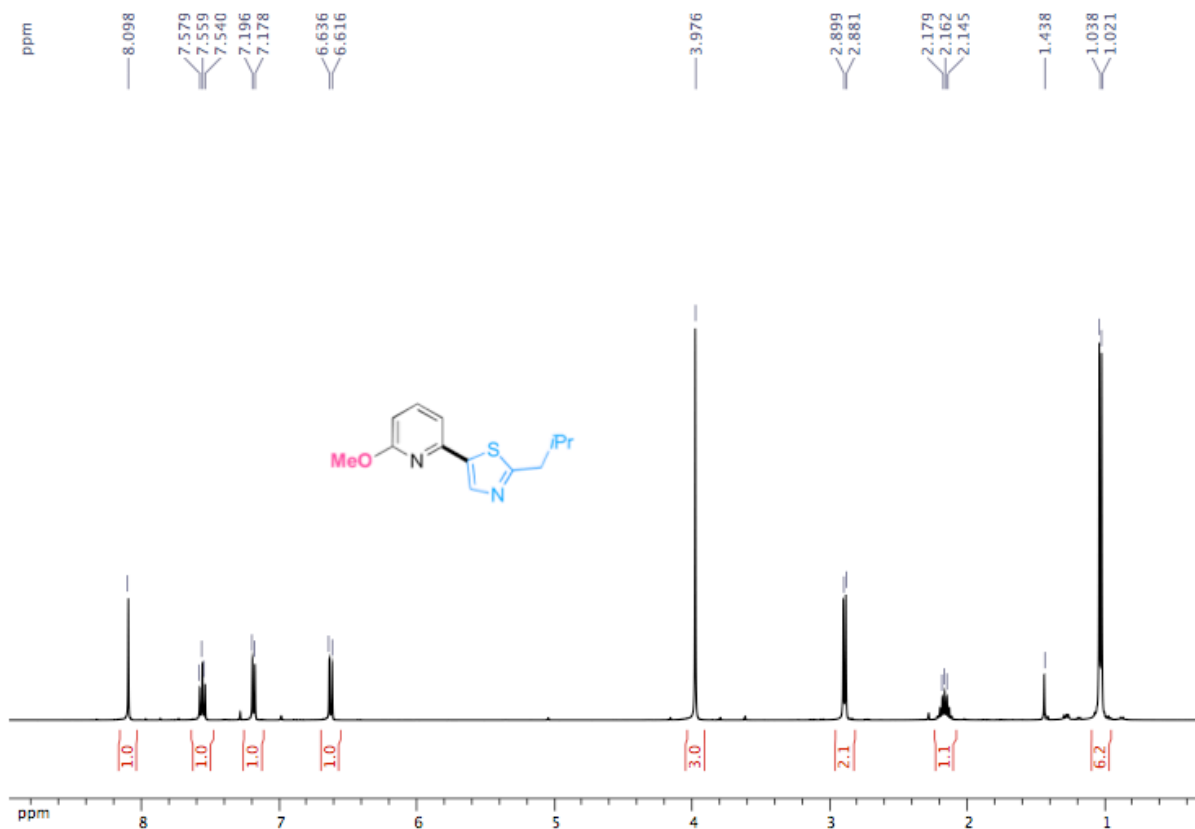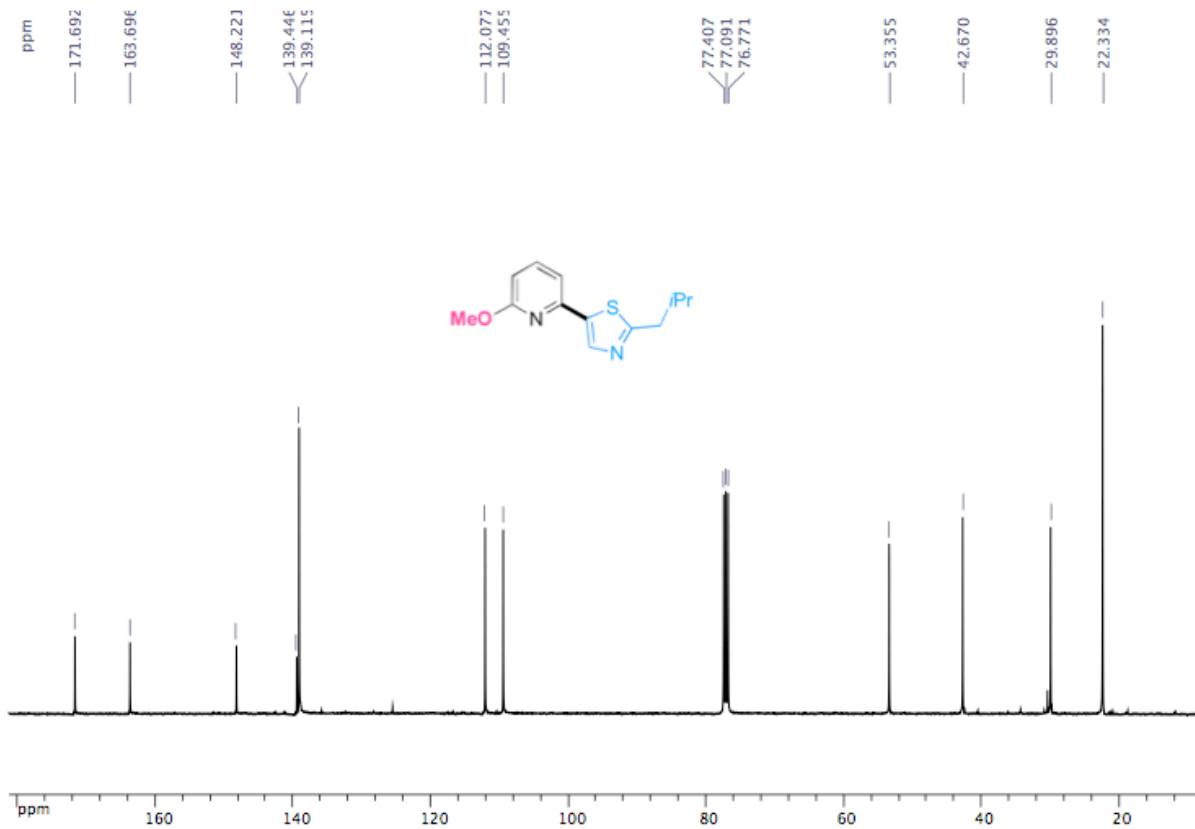



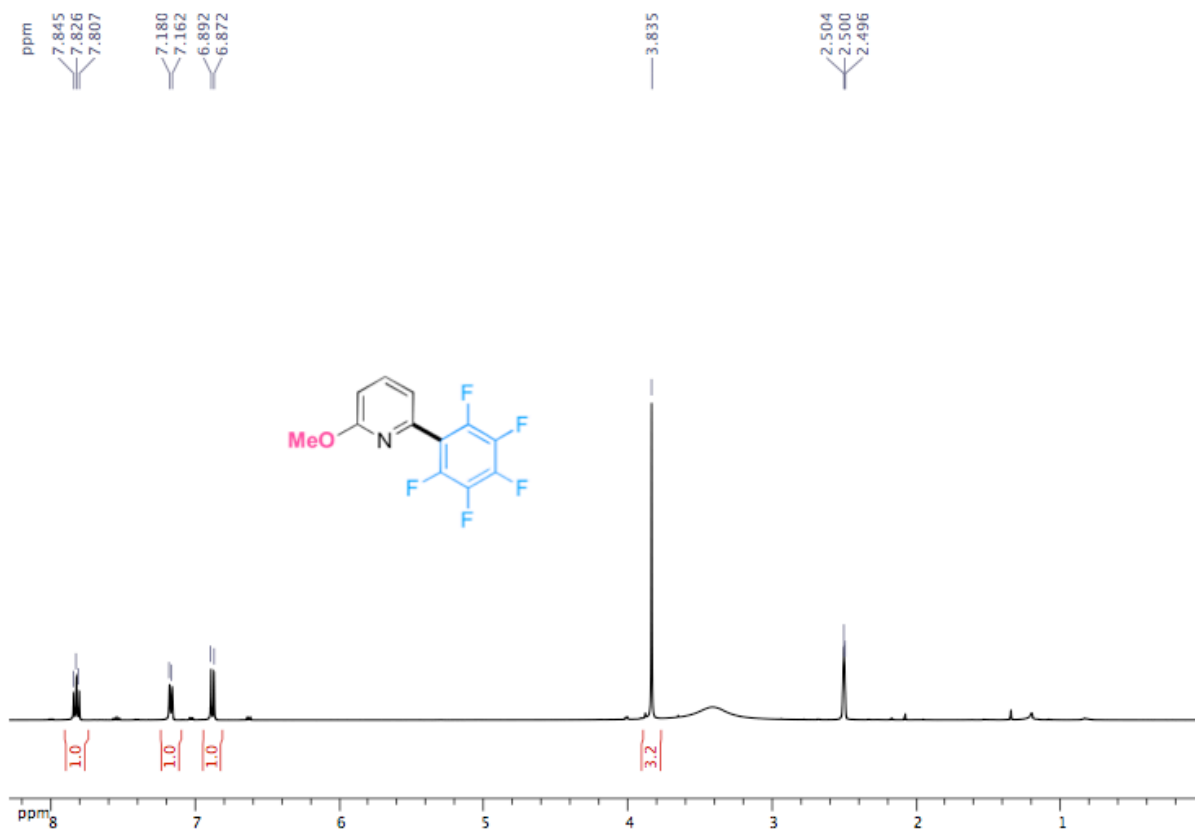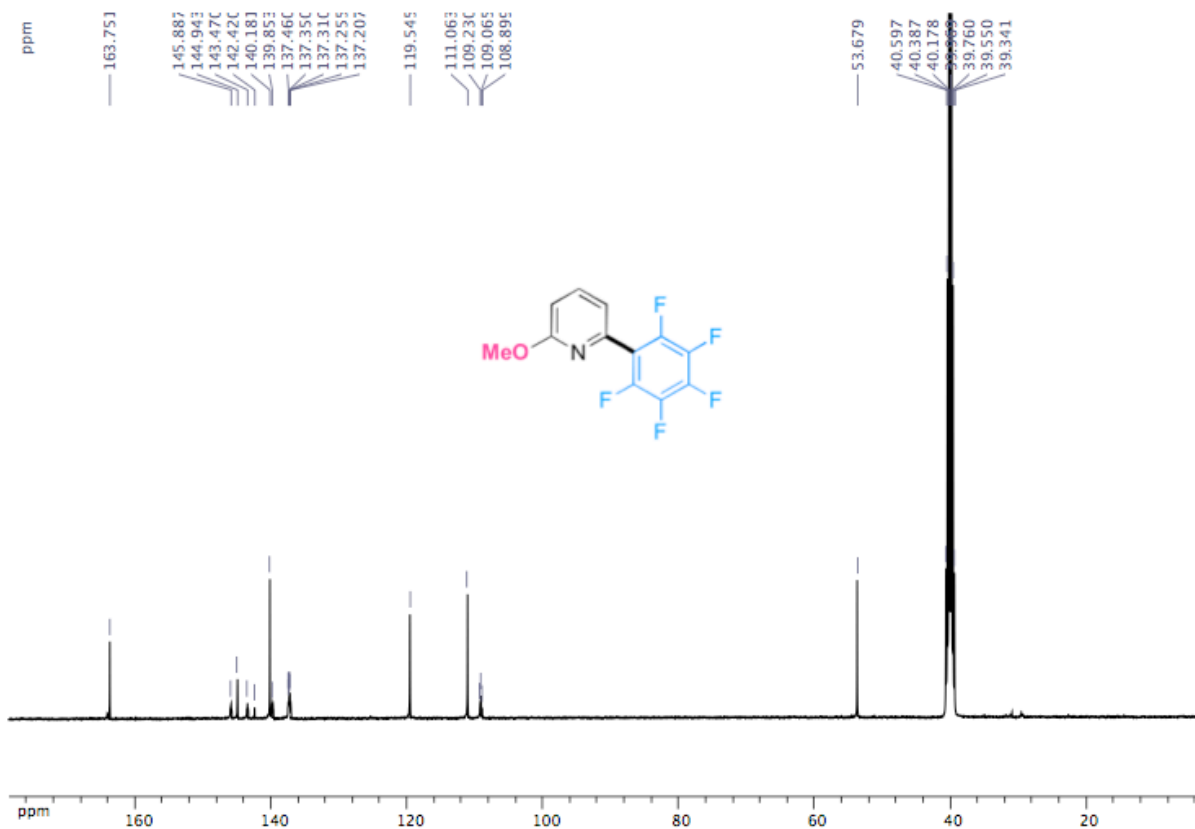

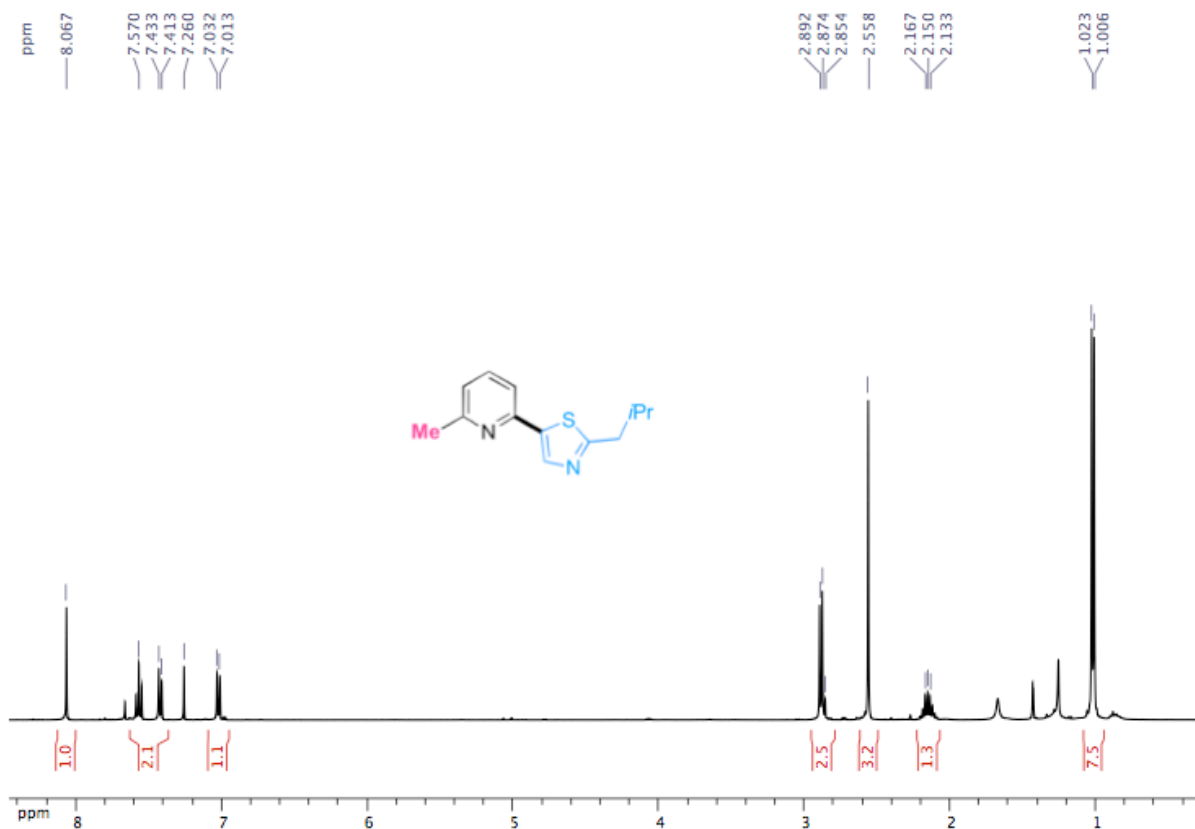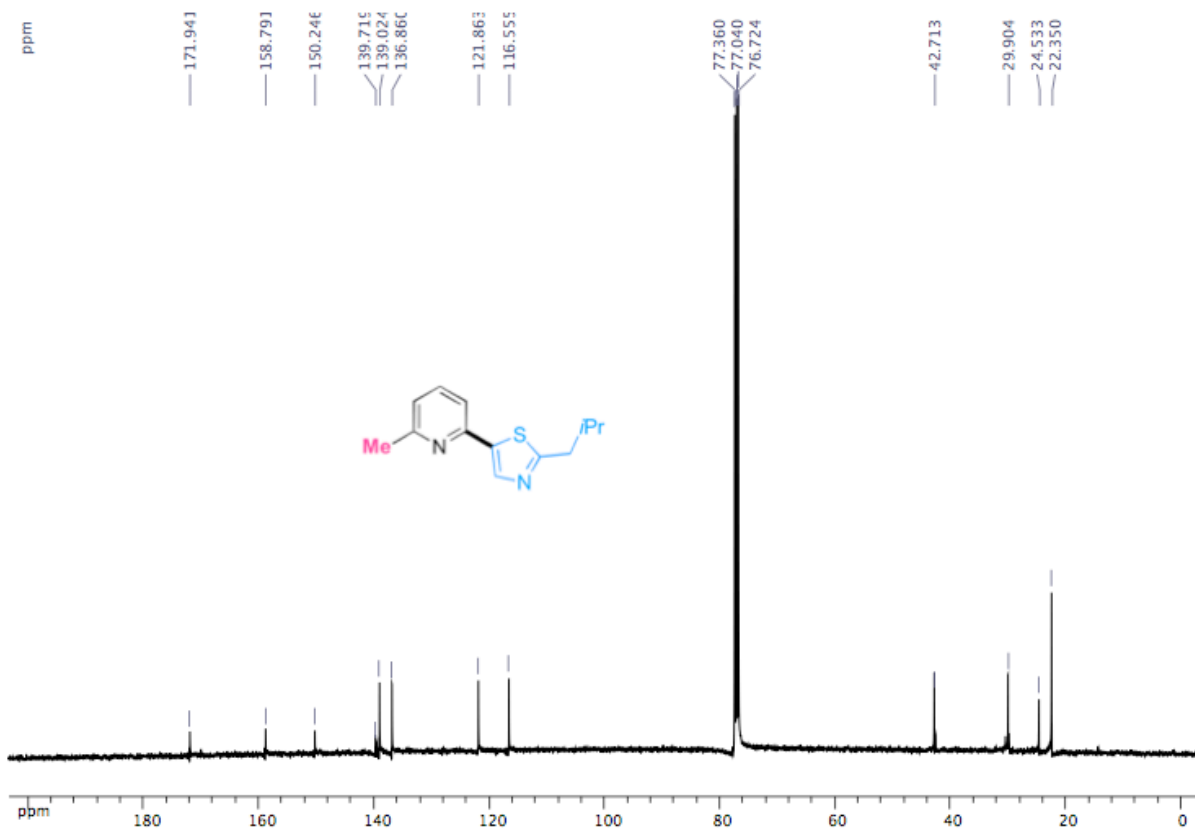

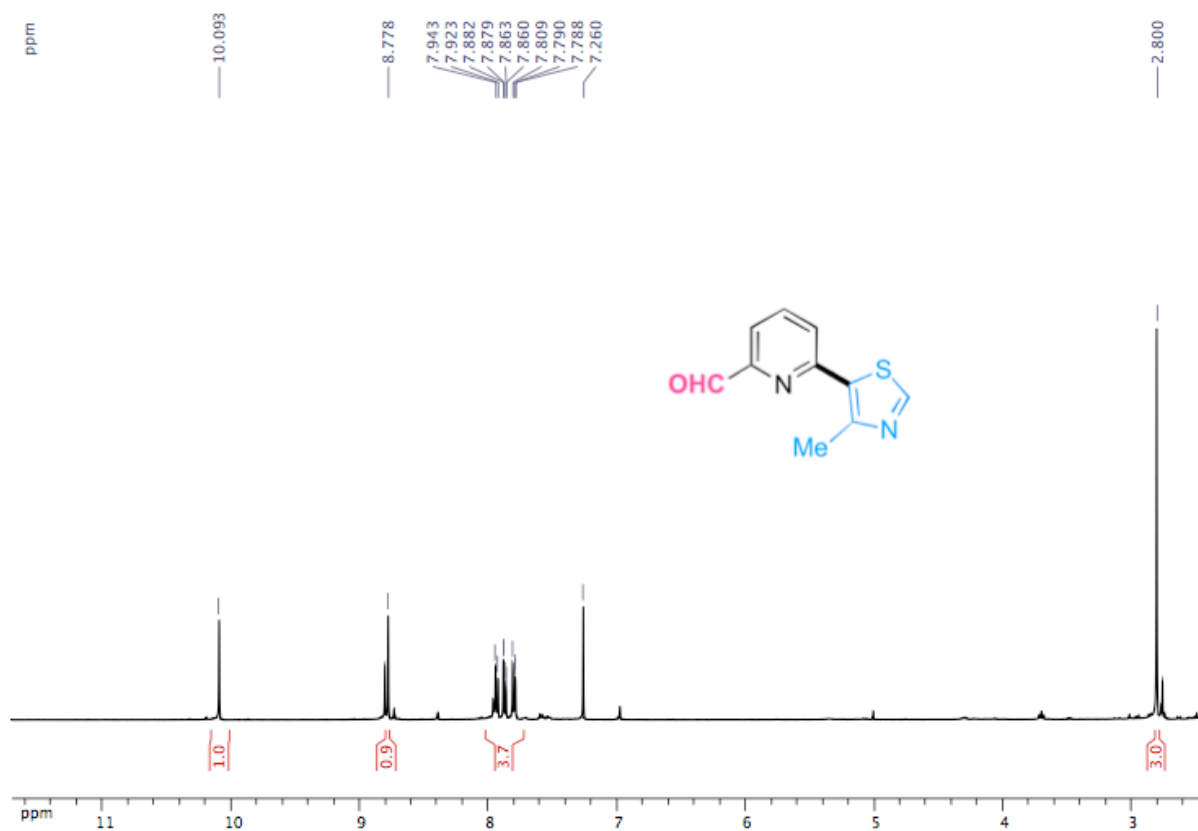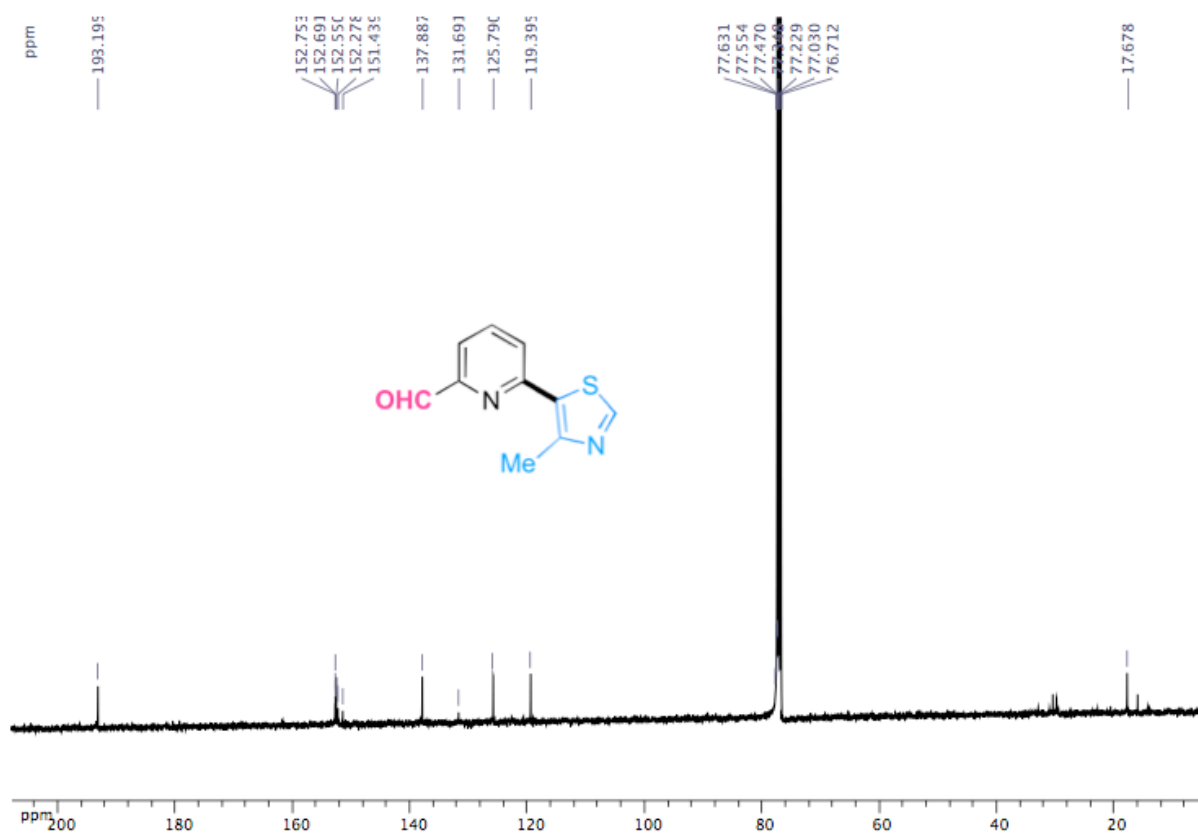

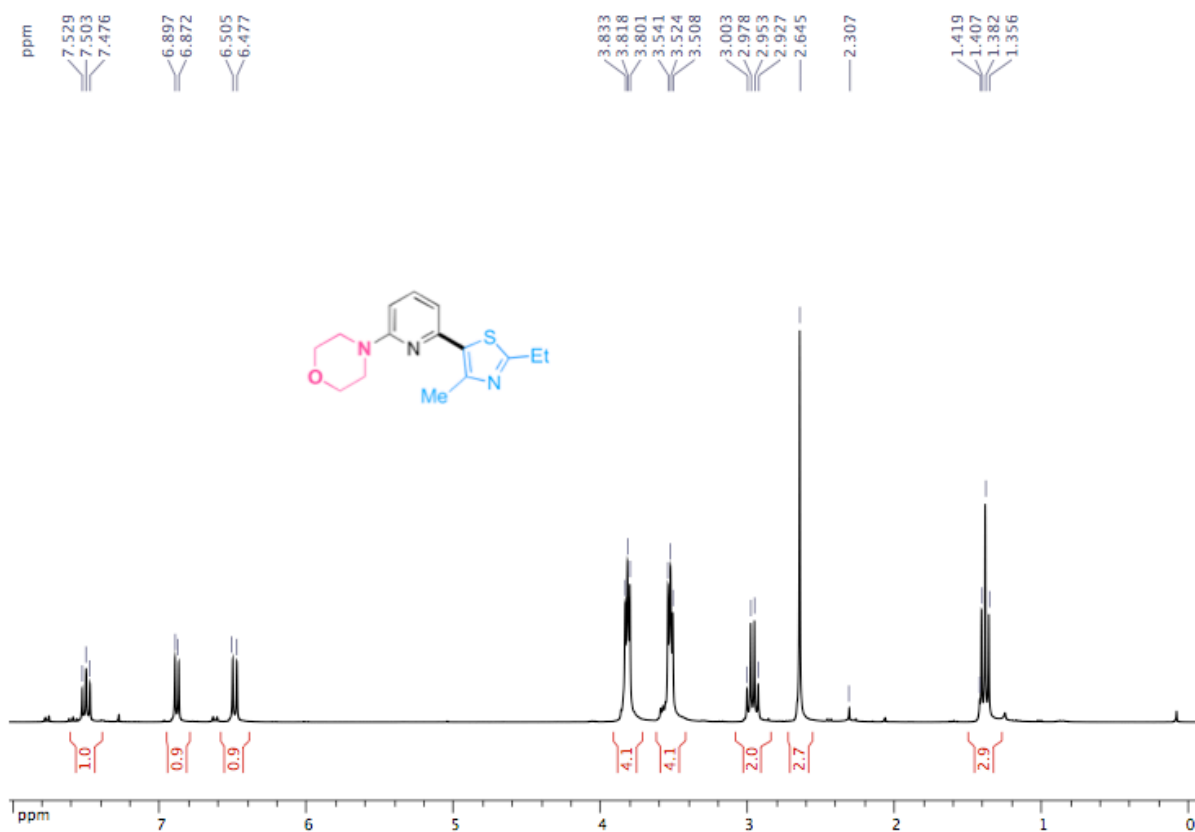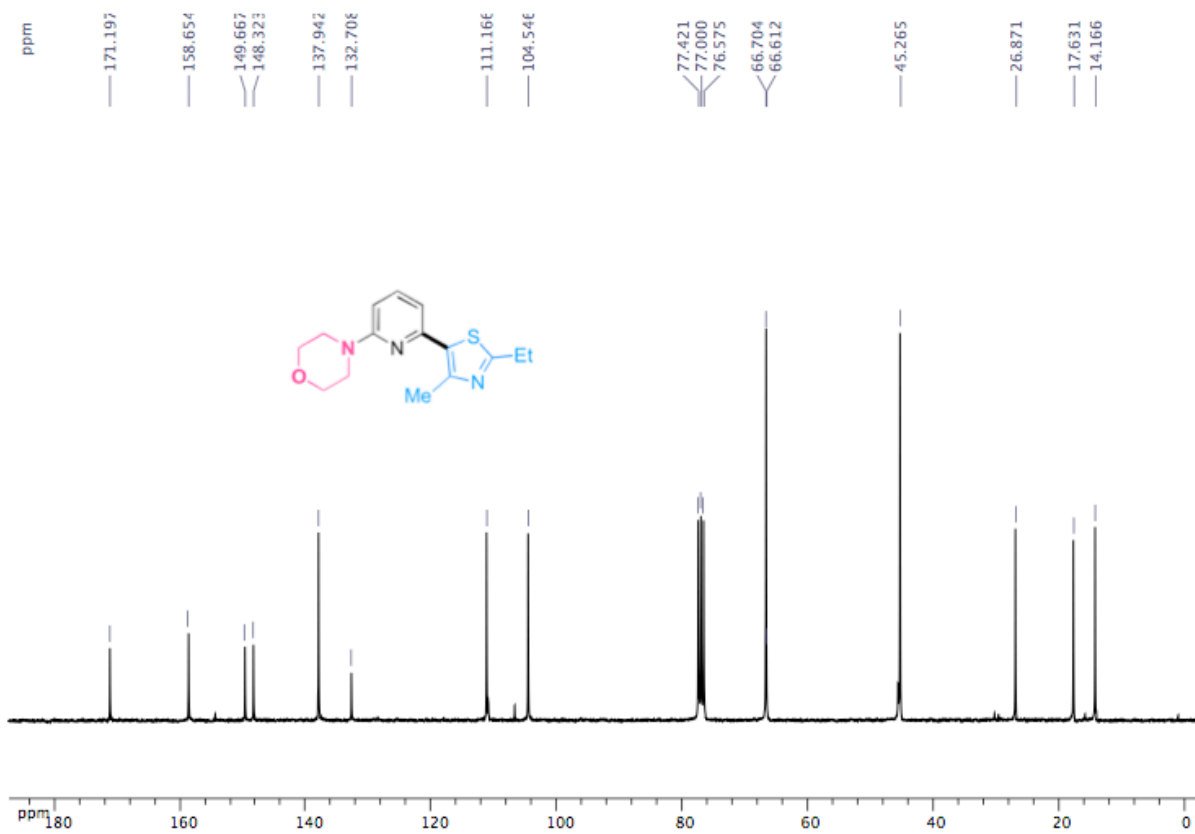

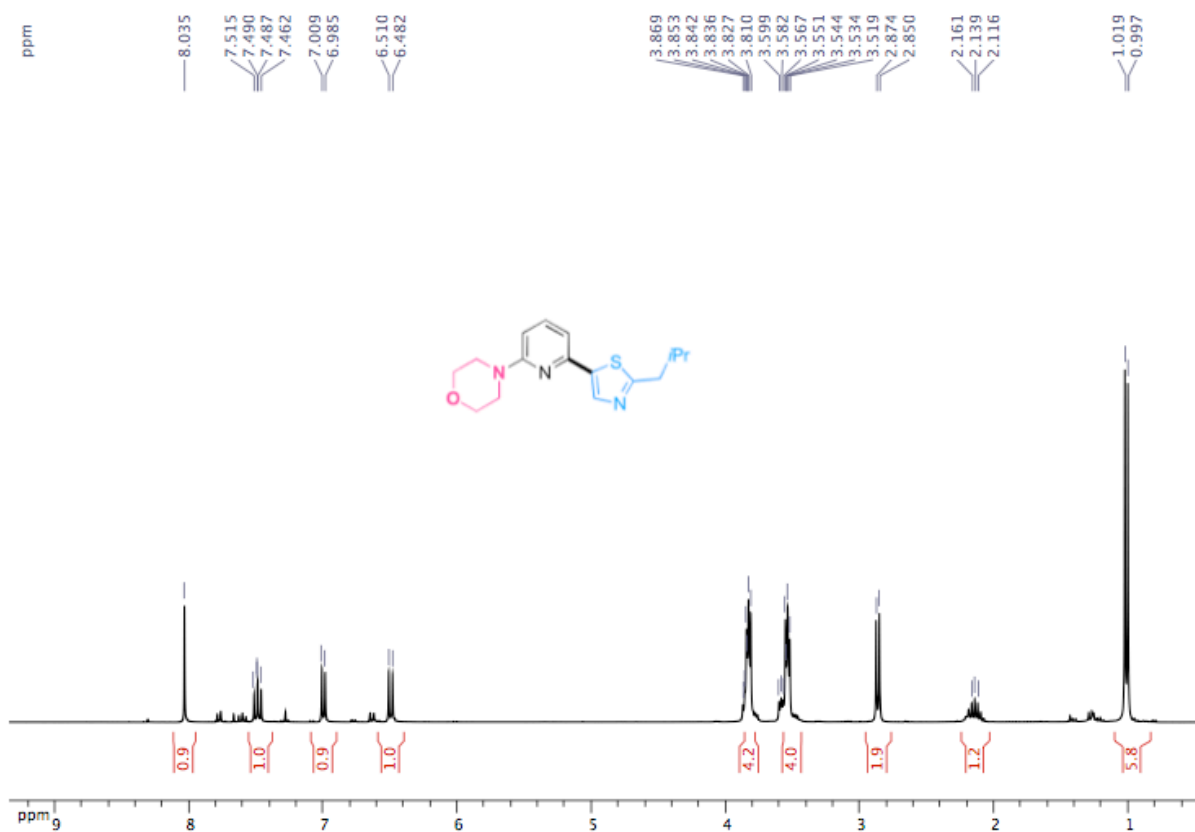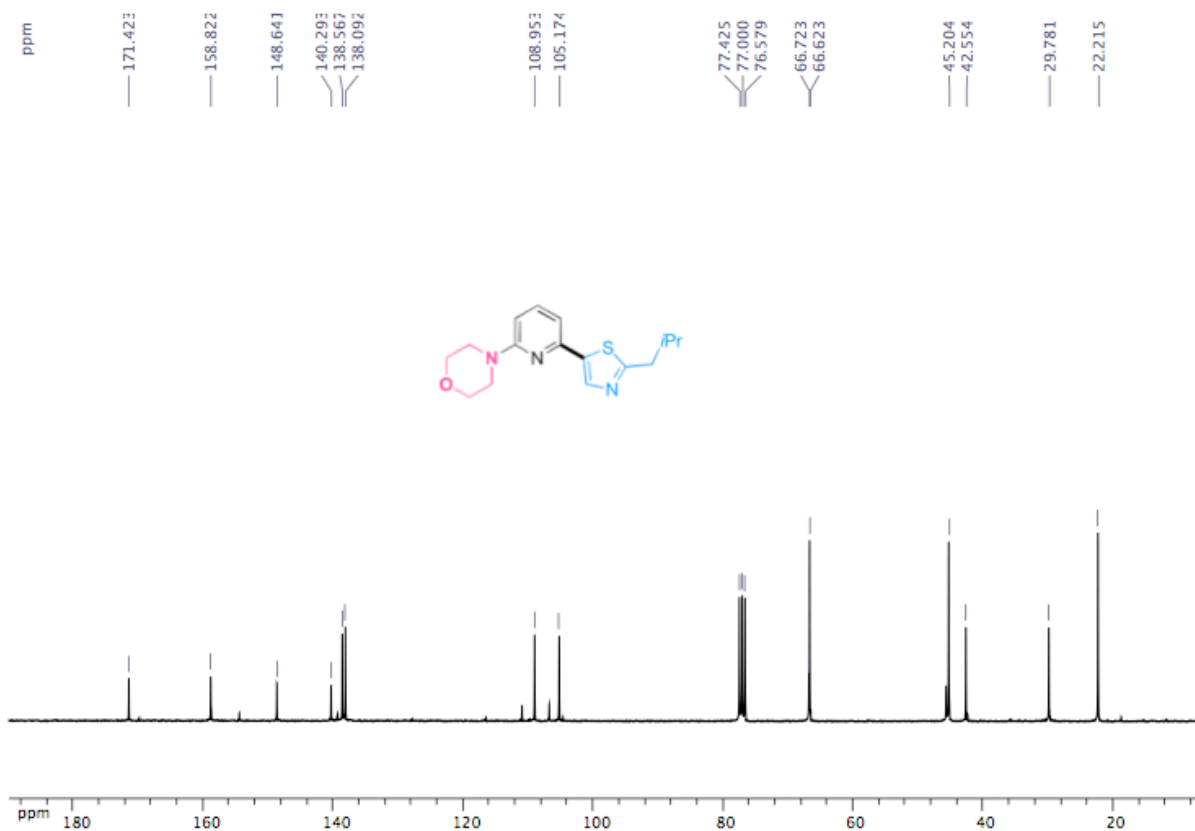

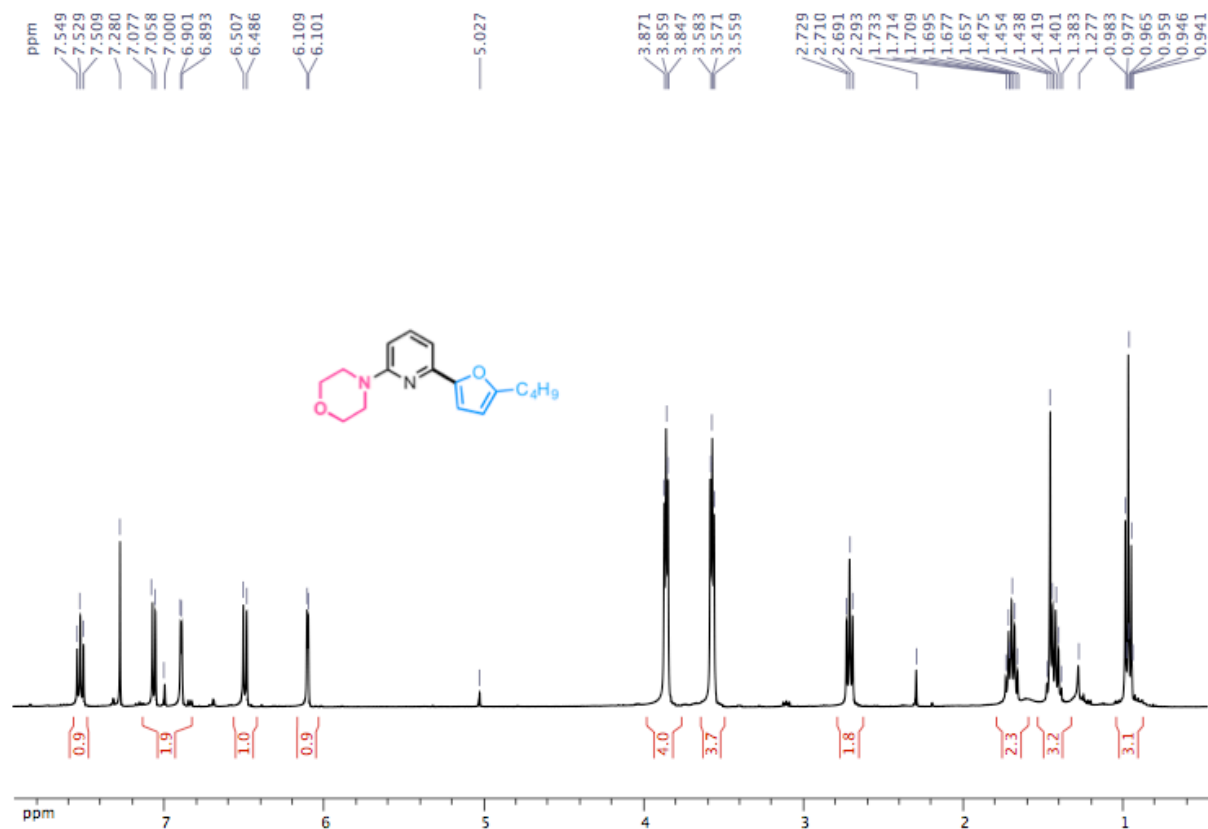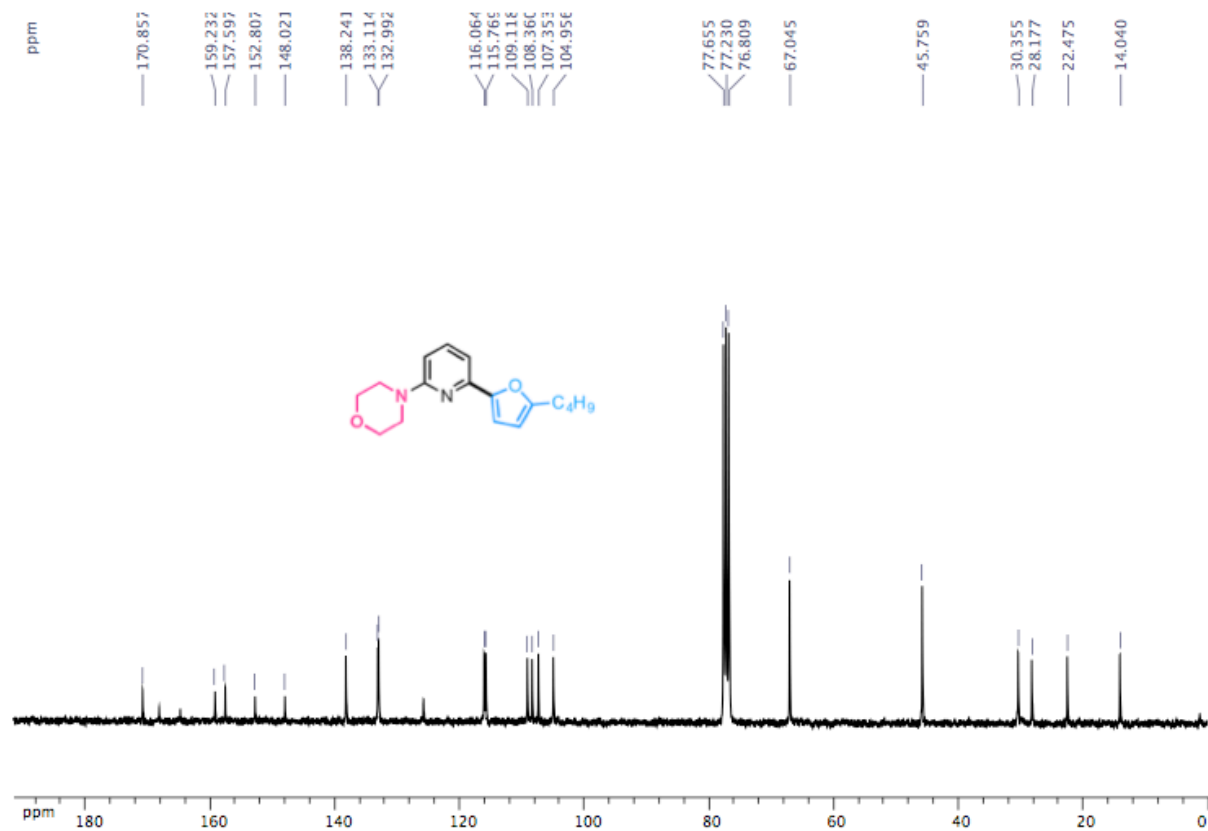

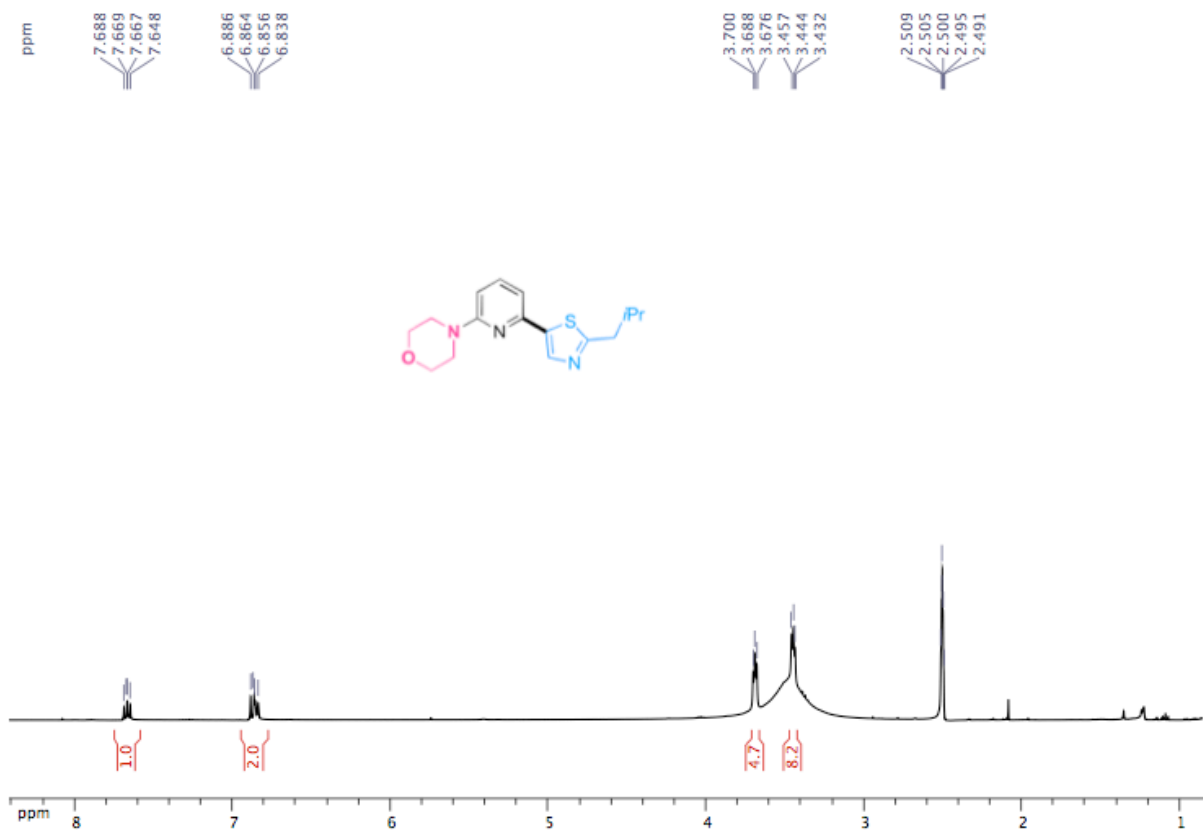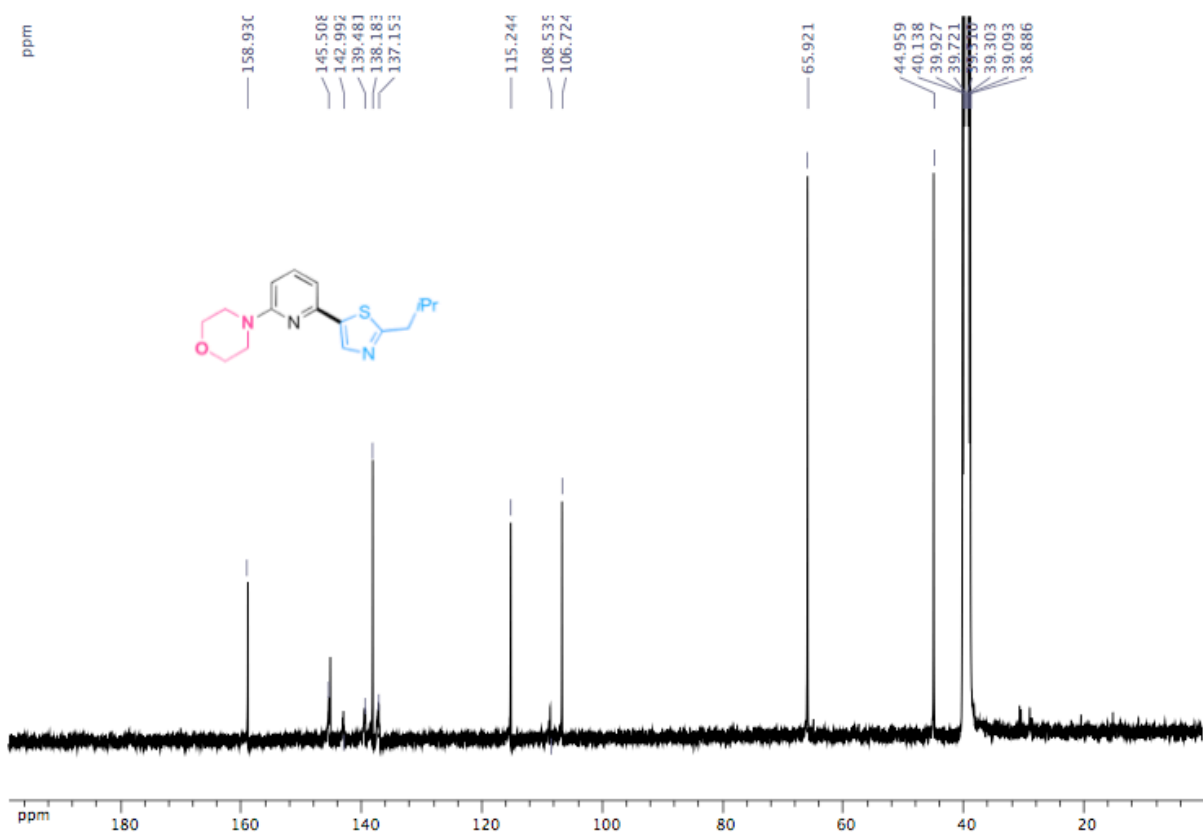

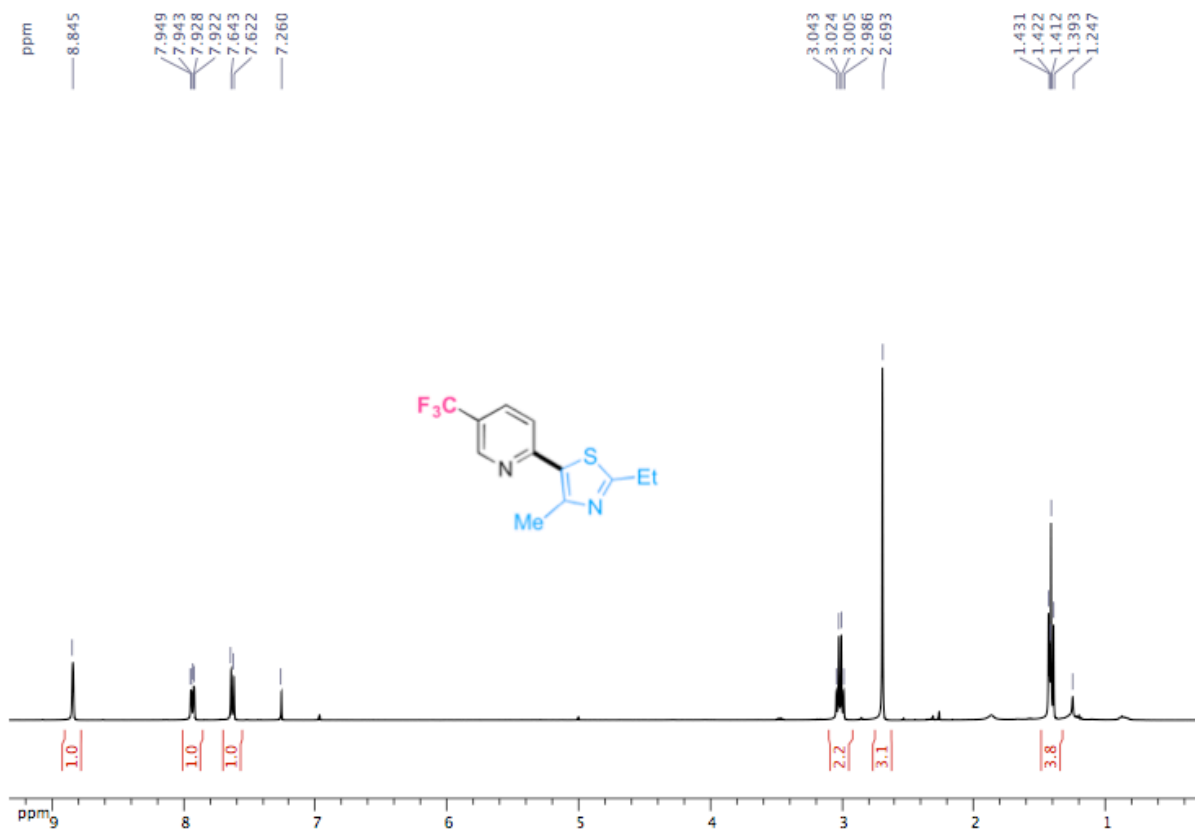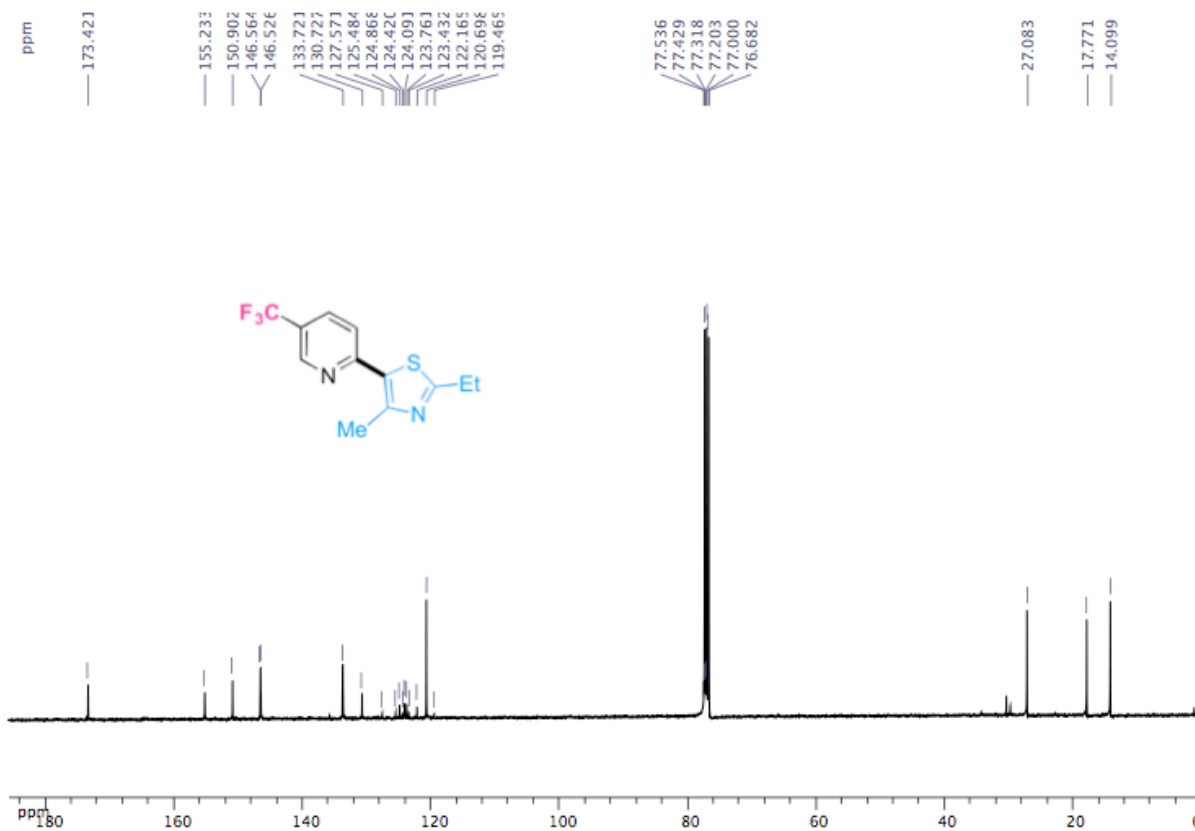



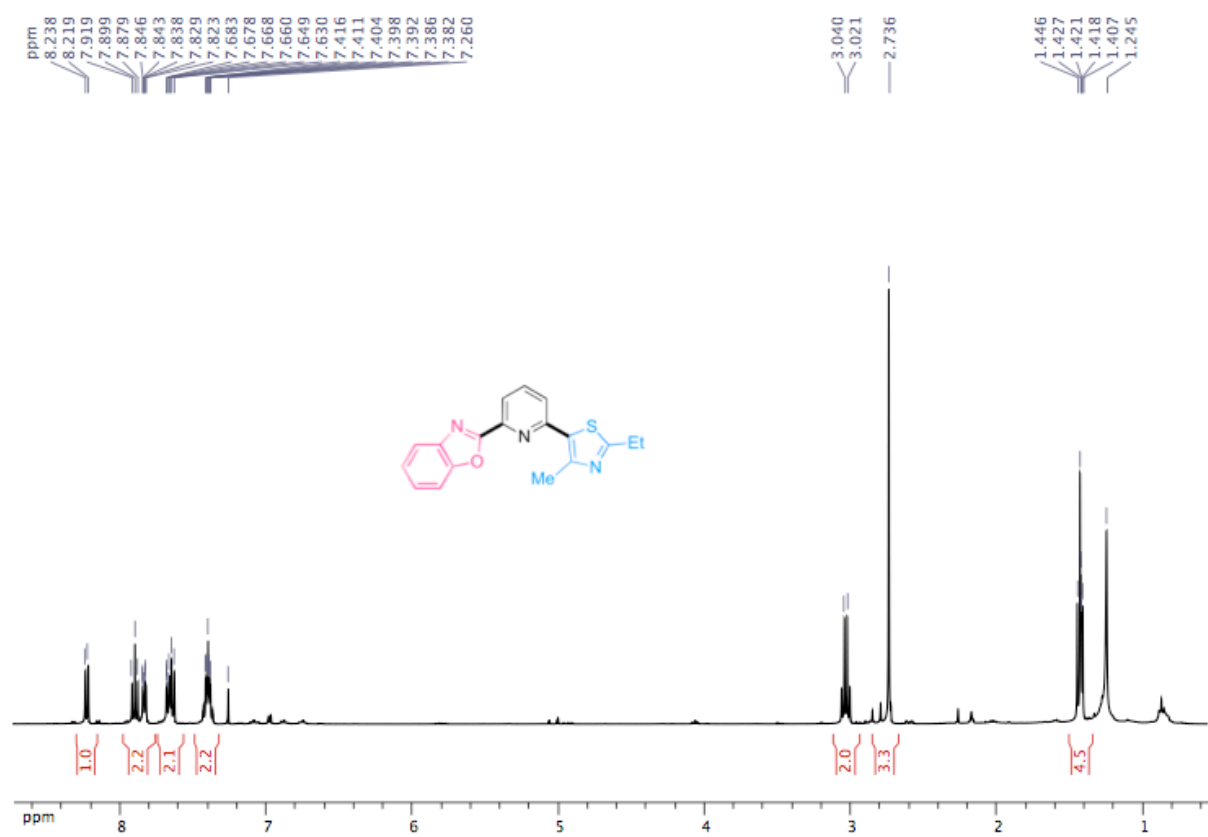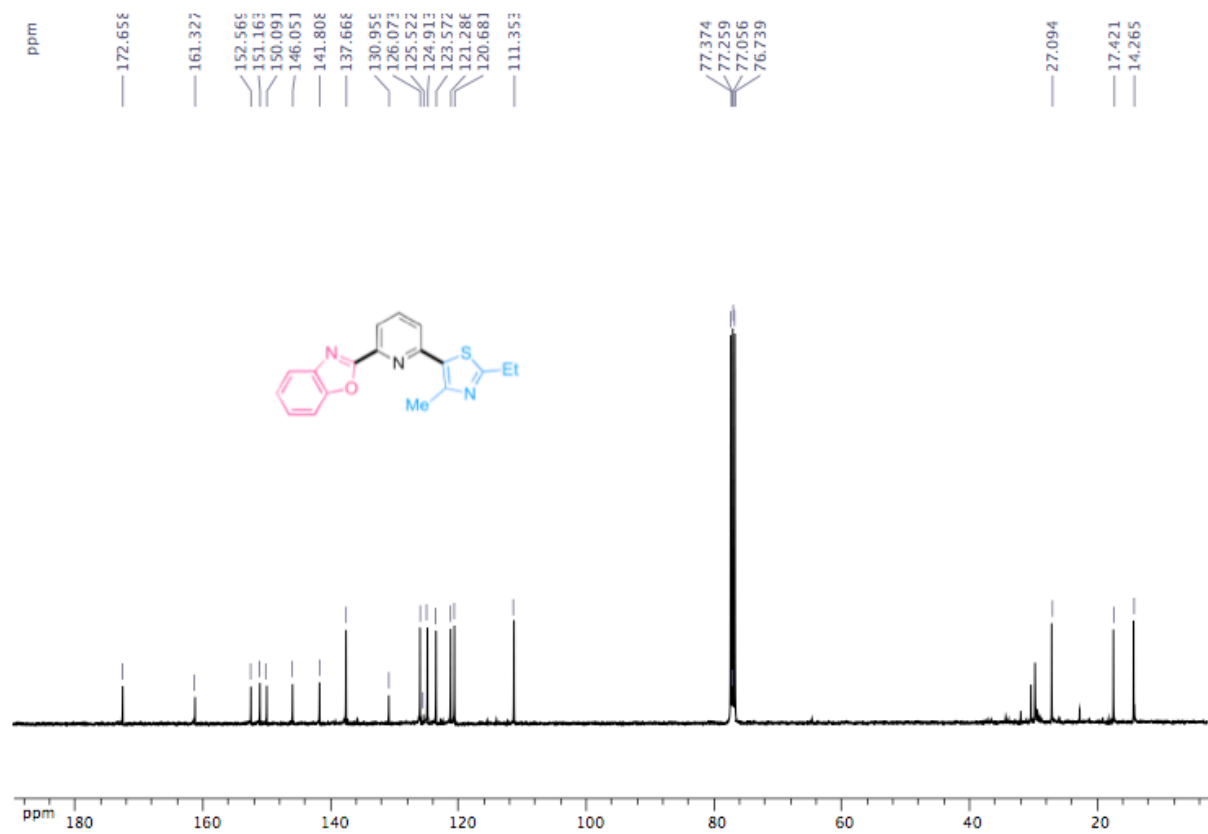

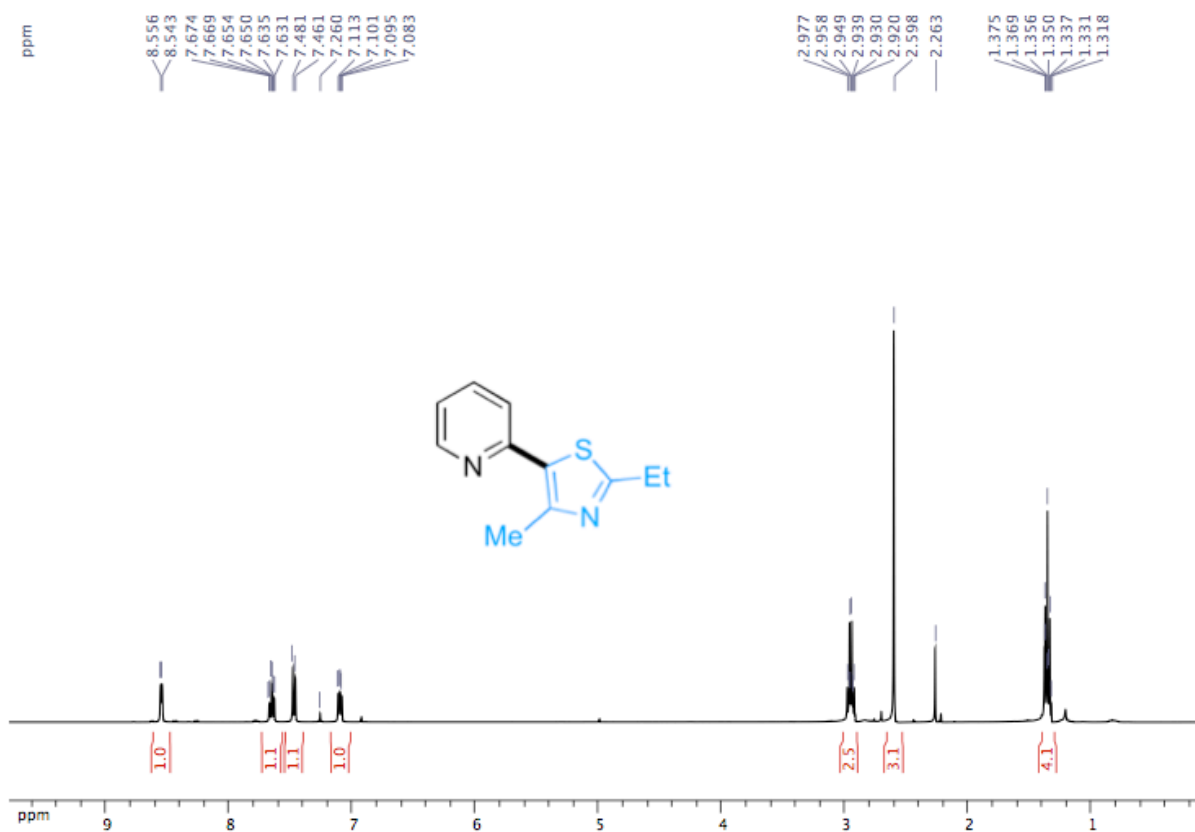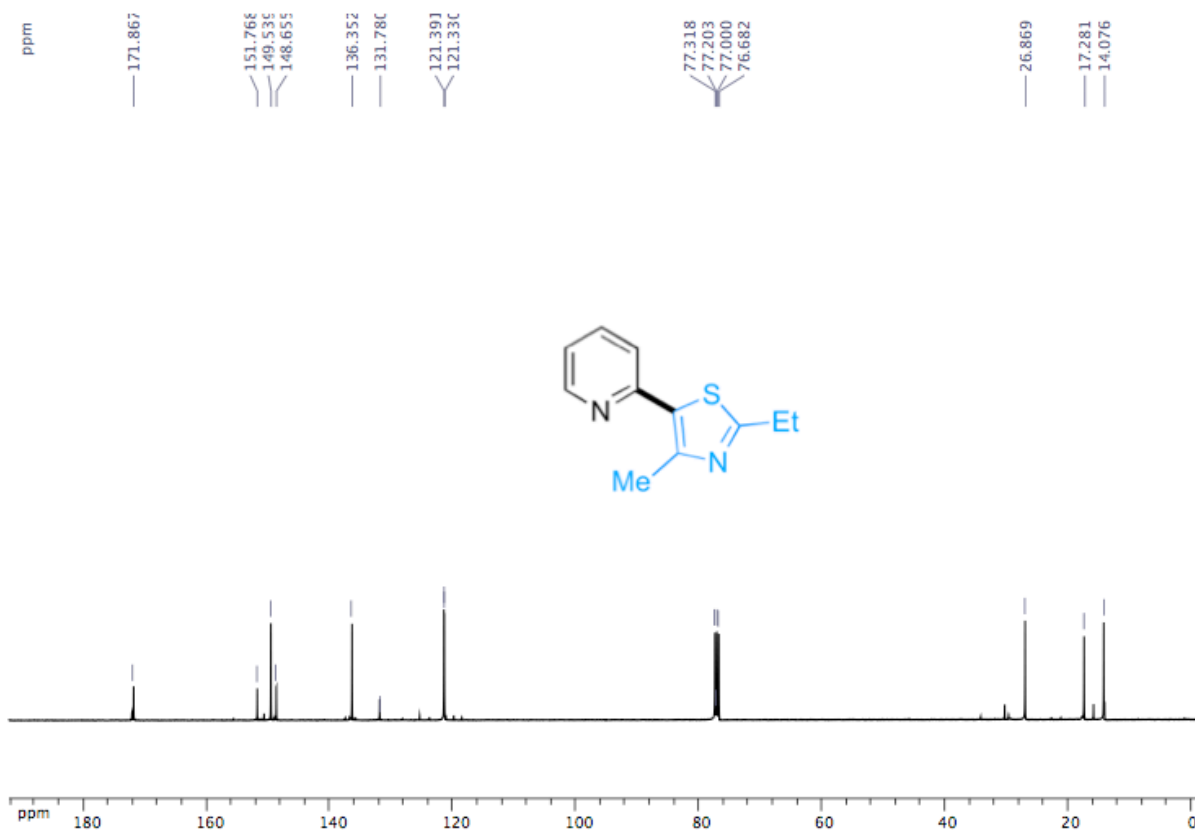

Supplement: c6ra01861k1.pdf [file c6ra01861k1.pdf]
